# Supplementary material for: Microarray Analysis of the Gene Expression Profile and Lipid Metabolism in Fat-1 Transgenic Cattle
Source: PLoS One. 2015 Oct 1;10(10):e0138874. doi: 10.1371/journal.pone.0138874 (PMC4591129; doi:10.1371/journal.pone.0138874)
Supplement: S2 Table — (XLS) [file pone.0138874.s004.xls]

## Sheet: Sheet1
S2 Table. Discrepancy of the expression and up regulation of transcripts in fat-1 transgenic cattle
ProbeName	p-value	FDR	Fold Change	Regulation	Gene Symbol	Description	Genbank Accession	Gene Name	Genomic Coordinates	RefSeqAccession
A_73_121381	0.00998144	0.0360812	1.80518	up	GGPS1	Bos taurus geranylgeranyl diphosphate synthase 1 (GGPS1), mRNA [NM_001079801]	NM_001079801	geranylgeranyl diphosphate synthase 1	chr28:8123195-8123253	NM_001079801
A_73_105021	0.0038366	0.0291957	2.14689	up					chr18:57971038-57970979
A_73_P080071	0.00762554	0.0342567	1.91832	up		neural precursor cell expressed, developmentally down-regulated 4, E3 ubiquitin protein ligase [Source:HGNC Symbol;Acc:7727] [ENSBTAT00000018331]	XM_002690890		chr10:54624684-54624743	XM_002690890
A_73_117484	0.032052	0.0451668	1.90893	up		Rep: CCNT1 protein - Bos taurus (Bovine), partial (23%) [TC426950]			chr6:31333932-31333873
A_73_P134811	0.0122554	0.0378336	1.75568	up		Hw_Fat_57_050812_D04 Bos taurus CF-24-HW fat cDNA library Bos taurus cDNA, mRNA sequence [DV778314]	DV778314		chr6:26922158-26922099
A_73_117305	0.025547	0.0429005	1.57786	up	FER	Bos taurus fer (fps/fes related) tyrosine kinase (FER), mRNA [NM_001191336]	NM_001191336	fer (fps/fes related) tyrosine kinase	chr7:110862579-110863966	NM_001191336
A_73_115189	0.00556933	0.0314574	2.53963	up	VNN1	Bos taurus vanin 1 (VNN1), mRNA [NM_001024556]	NM_001024556	vanin 1	chr9:71833330-71833299	NM_001024556
A_73_P440026	0.00929883	0.0351493	1.93568	up	SNX18	Bos taurus sorting nexin 18 (SNX18), mRNA [NM_001083731]	NM_001083731	sorting nexin 18	chr20:24571525-24571466	NM_001083731
A_73_P280546	0.0403986	0.0474259	1.99752	up	TTC28	Rep: Tetratricopeptide repeat protein 28 (TPR repeat protein 28). - Canis familiaris, partial (18%) [TC413565]	XM_002694620	tetratricopeptide repeat domain 28	chr17:69657108-69657049	XM_002694620
A_73_P081526	0.00687684	0.0334783	1.54325	up	SLC18B1	PREDICTED: Bos taurus chromosome 9 open reading frame, human C6orf192 (C9H6orf192), mRNA [XM_607492]	XM_607492	solute carrier family 18, subfamily B, member 1	chr9:71927557-71927498	XM_002690233
A_73_P167032	0.00622363	0.0322331	3.50747	up	LOC788835	PREDICTED: Bos taurus CD97 antigen-like (LOC788835), mRNA [XM_001789147]	XM_001789147	CD97 antigen-like	chr7:18672901-18672842	XM_002688898
A_73_P342056	0.0330627	0.0451668	2.7624	up	ALDH1A1	Bos taurus aldehyde dehydrogenase 1 family, member A1 (ALDH1A1), mRNA [NM_174239]	NM_174239	aldehyde dehydrogenase 1 family, member A1	chr8:49354527-49354468	NM_174239
A_73_P310201	0.00243064	0.0251024	1.77168	up	TPM1	Bos taurus tropomyosin 1 (alpha) (TPM1), mRNA [NM_001013590]	NM_001013590	tropomyosin 1 (alpha)	chr10:47059542-47058039	NM_001013590
A_73_107272	0.00722463	0.033759	1.56544	up	HTATIP2	Bos taurus HIV-1 Tat interactive protein 2, 30kDa (HTATIP2), mRNA [NM_001040563]	NM_001040563	HIV-1 Tat interactive protein 2, 30kDa	chr29:24811463-24811404	NM_001040563
A_73_118979	0.0404677	0.0474259	2.03427	up	CRYBA1	Bos taurus crystallin, beta A1 (CRYBA1), mRNA [NM_174523]	NM_174523	crystallin, beta A1	chr19:21152060-21152119	NM_174523
A_73_P121696	0.00137274	0.0222034	2.33092	up	PTPRB	Bos taurus protein tyrosine phosphatase, receptor type, B (PTPRB), mRNA [NM_001205297]	NM_001205297	protein tyrosine phosphatase, receptor type, B	chr5:43239251-43239310	NM_001205297
A_73_111877	0.0261055	0.0430154	1.64196	up	KCTD7	Bos taurus potassium channel tetramerisation domain containing 7 (KCTD7), mRNA [NM_001102545]	NM_001102545	potassium channel tetramerisation domain containing 7	chr25:28472354-28472413	NM_001102545
A_73_P059671	0.0361032	0.0465199	1.63847	up	LRP2BP	LRP2 binding protein [Source:HGNC Symbol;Acc:25434] [ENSBTAT00000006705]	XM_002698655	LRP2 binding protein	chr27:14674240-14674181	XM_002698655
A_73_114700	0.00718862	0.033759	3.32564	up	RET	Bos taurus ret proto-oncogene (RET), mRNA [NM_001191483]	NM_001191483	ret proto-oncogene	chr28:13593561-13594949	NM_001191483
A_73_P077946	0.0236079	0.0419443	2.05327	up	MTM1	Bos taurus myotubularin 1 (MTM1), mRNA [NM_001206425]	NM_001206425	myotubularin 1	chrX:33551440-33551499	NM_001206425
A_73_112007	0.00894137	0.0351263	1.60653	up	C9H6orf70	Bos taurus chromosome 9 open reading frame, human C6orf70 (C9H6orf70), mRNA [NM_001105255]	NM_001105255	chromosome 9 open reading frame, human C6orf70	chr9:105157054-105157113	NM_001105255
A_73_121257	0.023998	0.0420294	1.53277	up	GNG12	Bos taurus guanine nucleotide binding protein (G protein), gamma 12, mRNA (cDNA clone MGC:152342 IMAGE:8039218), complete cds. [BC142068]	BC142068	guanine nucleotide binding protein (G protein), gamma 12	chr3:77950475-77950534
A_73_114677	0.0416977	0.0479159	1.74511	up		Rep: IKAROS family zinc finger 2 - Bos taurus (Bovine), partial (13%) [TC459068]			chr10:84445249-84445308
A_73_111614	0.0463246	0.048938	1.89027	up		Rep: Soluble di-iron monooxygenase alpha subunit - uncultured bacterium, partial (11%) [TC469677]			chr4:56519384-56519443
A_73_P056626	0.00554858	0.0314574	1.98992	up	LOC506897	Rep: Olfactory receptor 51G2. - Canis familiaris, partial (97%) [TC398145]	XM_002693371	olfactory receptor, family 51, subfamily G, member 2-like	chr15:50742269-50742328	XM_002693371
A_73_P388036	0.0298166	0.0443448	1.96278	up	TRMT1L	Bos taurus tRNA methyltransferase 1 homolog (S. cerevisiae)-like (TRMT1L), mRNA [NM_001098121]	NM_001098121	tRNA methyltransferase 1 homolog (S. cerevisiae)-like	chr16:67643653-67641722	NM_001098121
A_73_115908	0.0443997	0.0486135	1.80504	up	SMPDL3A	Bos taurus sphingomyelin phosphodiesterase, acid-like 3A (SMPDL3A), mRNA [NM_001035019]	NM_001035019	sphingomyelin phosphodiesterase, acid-like 3A	chr9:28812024-28811965	NM_001035019
A_73_101999	0.0208072	0.0408446	5.20122	up	CA4	Bos taurus carbonic anhydrase IV (CA4), mRNA [NM_173897]	NM_173897	carbonic anhydrase IV	chr19:13109752-13109693	NM_173897
A_73_P277246	0.00827266	0.0347005	1.50603	up	PDZK1	Bos taurus PDZ domain containing 1 (PDZK1), mRNA [NM_001034611]	NM_001034611	PDZ domain containing 1	chr3:21800921-21800980	NM_001034611
A_73_121109	0.0436251	0.0483917	1.70688	up	ANKRD49	Bos taurus ankyrin repeat domain 49 (ANKRD49), mRNA [NM_001014965]	NM_001014965	ankyrin repeat domain 49	chr15:1734037-1734096	NM_001014965
A_73_P121361	0.0172601	0.0395568	2.07571	up		1372319 MARC 7BOV Bos taurus cDNA 5', mRNA sequence [DN536235]	DN536235		chr18:60919463-60919404
A_73_P059121	0.0137078	0.0385974	2.61849	up	RET	Bos taurus ret proto-oncogene (RET), mRNA [NM_001191483]	NM_001191483	ret proto-oncogene	chr28:13612752-13614268	NM_001191483
A_73_103105	0.0458304	0.0489114	1.55741	up	RP2	protein XRP2 [Source:RefSeq peptide;Acc:NP_001030480] [ENSBTAT00000049336]	BC153222	retinitis pigmentosa 2 (X-linked recessive)	chrX:90536279-90536338
A_73_117051	0.0123332	0.0378336	1.52673	up	METRNL	Bos taurus meteorin, glial cell differentiation regulator-like (METRNL), mRNA [NM_001206050]	NM_001206050	meteorin, glial cell differentiation regulator-like	chr19:50243941-50243882	NM_001206050
A_73_P071806	0.00485077	0.0306666	1.88221	up	AKT3	Bos taurus v-akt murine thymoma viral oncogene homolog 3 (protein kinase B, gamma) (AKT3), mRNA [NM_001191309]	NM_001191309	v-akt murine thymoma viral oncogene homolog 3 (protein kinase B, gamma)	chr16:34395951-34404311	NM_001191309
A_73_P035826	0.00999758	0.0360812	1.78601	up	SCD5	Bos taurus stearoyl-CoA desaturase 5 (SCD5), mRNA [NM_001076945]	NM_001076945	stearoyl-CoA desaturase 5	chr6:99233488-99233429	NM_001076945
A_73_P035506	0.0352527	0.0460676	8.60371	up	C16H1orf95	Bos taurus chromosome 16 open reading frame, human C1orf95 (C16H1orf95), mRNA [NM_001083770]	NM_001083770	chromosome 16 open reading frame, human C1orf95	chr16:30360057-30360116	NM_001083770
A_73_P033766	0.0358459	0.0463862	2.06626	up	ATP2B1	Bos taurus ATPase, Ca++ transporting, plasma membrane 1 (ATP2B1), mRNA [NM_174696]	NM_174696	ATPase, Ca++ transporting, plasma membrane 1	chr5:19540032-19539973	NM_174696
A_73_P094796	0.00133652	0.0218333	1.79651	up	LOC613365	Uncharacterized protein [Source:UniProtKB/TrEMBL;Acc:E1BL83] [ENSBTAT00000044793]	XM_002703684	formiminotransferase cyclodeaminase-like	chr2:88810163-88810104	XM_002703684
A_73_P161147	0.024378	0.0422221	1.60239	up	FKBP5	Bos taurus FK506 binding protein 5 (FKBP5), mRNA [NM_001192862]	NM_001192862	FK506 binding protein 5	chr23:9521464-9521405	NM_001192862
A_73_P067461	0.0114317	0.0374277	1.95922	up	ZNF208	Bos taurus zinc finger protein 540, mRNA (cDNA clone IMAGE:8041648), partial cds. [BC108220]	BC108220	zinc finger protein 208	chr18:47321142-47321201	XM_003587245
A_73_112575	0.011209	0.0374277	1.53915	up		Hw_Fat_47_050805_A05 Bos taurus CF-24-HW fat cDNA library Bos taurus cDNA, mRNA sequence [DV780662]	DV780662		chr24:32897804-32897863	XM_002697723
A_73_P090626	0.0138966	0.0385974	2.56817	up	AVIL	Bos taurus advillin (AVIL), mRNA [NM_001192529]	NM_001192529	advillin	chr5:56001700-56001759	NM_001192529
A_73_116573	0.00922061	0.0351493	5.55904	up	GSTM3	Bos taurus glutathione S-transferase mu 3 (brain) (GSTM3), mRNA [NM_001046560]	NM_001046560	glutathione S-transferase mu 3 (brain)	chr3:33770753-33770812	NM_001046560
A_73_P080386	0.0461704	0.0489114	2.17822	up	LOC100297513	Uncharacterized protein [Source:UniProtKB/TrEMBL;Acc:E1B846] [ENSBTAT00000018375]	XM_002700656	uncharacterized LOC100297513	chr10:76820198-76820139	XM_002691064
A_73_P117336	0.0157998	0.039183	1.6309	up	DPYD	Bos taurus dihydropyrimidine dehydrogenase (DPYD), mRNA [NM_174041]	NM_174041	dihydropyrimidine dehydrogenase	chr3:46486817-46486876	NM_174041
A_73_106794	0.0250394	0.0426897	1.64699	up		S-phase cyclin A-associated protein in the ER [Source:HGNC Symbol;Acc:13081] [ENSBTAT00000046397]	XM_001787809		chr21:32118901-32118842	XM_001787809
A_73_P511198	0.0427786	0.0481252	6.66292	up					chr18:063276064-063276005
A_73_P090436	0.0370356	0.046603	1.69811	up	ANO6	anoctamin 6 [Source:HGNC Symbol;Acc:25240] [ENSBTAT00000003770]	XM_600052	anoctamin 6	chr5:35059756-35059697	XM_002687355
A_73_105327	0.0427989	0.0481252	1.88406	up		Rep: Isoform M2 of P11974 - Oryctolagus cuniculus (Rabbit), partial (16%) [TC434921]			chr10:9493656-9493715
A_73_P314466	0.0326393	0.0451668	1.55834	up	KIAA0753	KIAA0753 [Source:HGNC Symbol;Acc:29110] [ENSBTAT00000020714]	XM_002695767	KIAA0753 ortholog	chr19:25879707-25879766	XM_002695767
A_73_P308686	0.0146693	0.0385974	1.59481	up		zinc finger protein 529 [Source:HGNC Symbol;Acc:29328] [ENSBTAT00000003306]	XM_002694950		chr18:47198407-47198466	XM_002694950
A_73_P115986	0.0484442	0.0496104	1.8379	up		mitogen-activated protein kinase kinase kinase 2 [Source:HGNC Symbol;Acc:6854] [ENSBTAT00000005525]	DV909548		chr2:5166182-5166241	XM_002685232
A_73_P056126	0.00217889	0.0243923	1.73031	up		Rep: Zinc finger protein 91 - Homo sapiens (Human), partial (13%) [TC455125]	XM_001787832		chr18:60703745-60703686	XM_001787832
A_73_105595	0.0363602	0.0465199	2.23472	up		Rep: immunoglobulin superfamily, member 6 - Bos Taurus, complete [TC455925]	XM_001787744		chr25:20343628-20343569	XM_001787744
A_73_P165422	0.0175908	0.0396658	1.8004	up		coiled-coil domain containing 150 [Source:HGNC Symbol;Acc:26834] [ENSBTAT00000012295]	XM_001787516		chr2:85642866-85645342	XM_002685477
A_73_P119371	0.0447504	0.0486199	1.66012	up	CDC14B	Bos taurus CDC14 cell division cycle 14 homolog B (S. cerevisiae) (CDC14B), mRNA [NM_001193238]	NM_001193238	CDC14 cell division cycle 14 homolog B (S. cerevisiae)	chr8:84644372-84643607	NM_001193238
A_73_111171	0.00468797	0.0303141	2.66835	up		Rep: PAOX protein - Bos taurus (Bovine), partial (6%) [TC421639]			chrX:35640231-35640172
A_73_P492438	0.0202132	0.0403793	1.61704	up					chr7:042577900-042577959
A_73_P165322	0.020519	0.04064	2.54471	up	LOC512486	Bos taurus interferon-induced guanylate-binding protein 1 (LOC512486), mRNA [NM_001244229]	NM_001244229	interferon-induced guanylate-binding protein 1	chr3:54307167-54307108	NM_001244229
A_73_117391	0.0121695	0.0377945	1.99201	up	MYOF	Bos taurus myoferlin (MYOF), mRNA [NM_001193212]	NM_001193212	myoferlin	chr26:14667662-14667603	NM_001193212
A_73_P166657	0.0346818	0.0457847	1.99693	up	P4HA1	Bos taurus prolyl 4-hydroxylase, alpha polypeptide I (P4HA1), mRNA [NM_001075770]	NM_001075770	prolyl 4-hydroxylase, alpha polypeptide I	chr28:29270775-29270716	NM_001075770
A_73_P270051	0.0446735	0.0486199	1.58423	up	ZNF547	Bos taurus zinc finger protein 547 (ZNF547), mRNA [NM_001105360]	NM_001105360	zinc finger protein 547	chr18:64760279-64760220	NM_001105360
A_73_P172987	0.00466541	0.0303141	1.90864	up		1395351 MARC 7BOV Bos taurus cDNA 5', mRNA sequence [DN546217]	DN546217		chrX:91962347-91962288
A_73_P042981	0.00100208	0.0204442	23.9576	up	GNG4	Bos taurus guanine nucleotide binding protein (G protein), gamma 4 (GNG4), mRNA [NM_001103324]	NM_001103324	guanine nucleotide binding protein (G protein), gamma 4	chr28:8340202-8340143	NM_001103324
A_73_120710	0.00109229	0.0206523	4.54189	up	DEFB1	Bos taurus defensin, beta 1 (DEFB1), mRNA [NM_175703]	NM_175703	defensin, beta 1	chr27:5483546-5483487	NM_175703
A_73_115121	0.032482	0.0451668	1.51845	up	PPP1R14C	Bos taurus protein phosphatase 1, regulatory (inhibitor) subunit 14C (PPP1R14C), mRNA [NM_001078068]	NM_001078068	protein phosphatase 1, regulatory (inhibitor) subunit 14C	chr9:88500566-88500625	NM_001078068
A_73_102904	0.0119681	0.0377945	1.68141	up	AAED1	Bos taurus AhpC/TSA antioxidant enzyme domain containing 1 (AAED1), mRNA [NM_001076436]	NM_001076436	AhpC/TSA antioxidant enzyme domain containing 1	chr8:84801833-84801816	NM_001076436
A_73_105911	0.0192073	0.0399943	1.65519	up	GPR180	Bos taurus G protein-coupled receptor 180 (GPR180), mRNA [NM_001164031]	NM_001164031	G protein-coupled receptor 180	chr12:69663137-69663196	NM_001164031
A_73_116908	0.0284373	0.0435953	1.69451	up	C4H7orf41	Bos taurus chromosome 4 open reading frame, human C7orf41 (C4H7orf41), mRNA [NM_001101246]	NM_001101246	chromosome 4 open reading frame, human C7orf41	chr4:66611015-66610957	NM_001101246
A_73_115871	0.0314826	0.04496	1.62355	up	TUBA1D	Bos taurus tubulin, alpha 3d (TUBA1D), mRNA [NM_001046410]	NM_001046410	tubulin, alpha 3d	chr2:107942427-107942485	NM_001046410
A_73_P124921	0.0116983	0.0376985	1.61575	up		chromosome 7 open reading frame 63 [Source:HGNC Symbol;Acc:26107] [ENSBTAT00000004561]	DV892775		chr4:74983753-74983812	XM_003582110
A_73_108377	0.000952	0.0204442	1.84951	up	GTF2H3	Bos taurus general transcription factor IIH, polypeptide 3, 34kDa (GTF2H3), mRNA [NM_001079589]	NM_001079589	general transcription factor IIH, polypeptide 3, 34kDa	chr17:54277255-54277196	NM_001079589
A_73_P035176	0.00562289	0.0314574	5.00272	up	CDO1	Bos taurus cysteine dioxygenase, type I (CDO1), mRNA [NM_001034465]	NM_001034465	cysteine dioxygenase, type I	chr10:4598890-4598831	NM_001034465
A_73_P054836	0.0334194	0.0453739	1.67339	up	CDADC1	Bos taurus cytidine and dCMP deaminase domain containing 1 (CDADC1), mRNA [NM_001206518]	NM_001206518	cytidine and dCMP deaminase domain containing 1	chr12:18986867-18990773	NM_001206518
A_73_113516	5.16e-05	0.00960991	5.36531	up	CA5A	Bos taurus carbonic anhydrase VA, mitochondrial (CA5A), nuclear gene encoding mitochondrial protein, mRNA [NM_001192409]	NM_001192409	carbonic anhydrase VA, mitochondrial	chr18:13389805-13389746	NM_001192409
A_73_100441	0.0483469	0.0495833	2.56275	up	SAG	Bos taurus S-antigen; retina and pineal gland (arrestin) (SAG), mRNA [NM_181000]	NM_181000	S-antigen; retina and pineal gland (arrestin)	chr3:113655662-113660330	NM_181000
A_73_P092846	0.0418072	0.0479211	2.03182	up	FAM102B	family with sequence similarity 102, member B [Source:HGNC Symbol;Acc:27637] [ENSBTAT00000007157]		family with sequence similarity 102, member B	chr3:34839118-34839059
A_73_100400	0.0264116	0.0430401	1.56296	up	CYP4V2	Bos taurus cytochrome P450, family 4, subfamily V, polypeptide 2 (CYP4V2), mRNA [NM_001034373]	NM_001034373	cytochrome P450, family 4, subfamily V, polypeptide 2	chr27:15323286-15323345	NM_001034373
A_73_106506	0.00247919	0.0251866	1.79584	up	SNX29	Bos taurus sorting nexin 29 (SNX29), mRNA [NM_001076862]	NM_001076862	sorting nexin 29	chr25:11037750-11110567	NM_001076862
A_73_P325876	0.0405745	0.0474259	1.5099	up	MCART1	Bos taurus mitochondrial carrier triple repeat 1 (MCART1), nuclear gene encoding mitochondrial protein, mRNA [NM_001099394]	NM_001099394	mitochondrial carrier triple repeat 1	chr8:62436868-62436809	NM_001099394
A_73_P428656	0.0279554	0.0435098	2.27527	up	PKN2	Bos taurus protein kinase N2 (PKN2), mRNA [NM_001193242]	NM_001193242	protein kinase N2	chr3:55254109-55253969	NM_001193242
A_73_104652	0.0142707	0.0385974	1.5638	up	CLIC5	Bos taurus chloride intracellular channel 5 (CLIC5), nuclear gene encoding mitochondrial protein, mRNA [NM_174276]	NM_174276	chloride intracellular channel 5	chr23:19173631-19167562	NM_174276
A_73_P118051	0.0495242	0.0498576	1.56833	up		LB01717.CR_M15 GC_BGC-17 Bos taurus cDNA clone IMAGE:8094233, mRNA sequence [DV815794]	DV815794		chr17:67763931-67763990
A_73_110289	0.0119126	0.0377945	1.74034	up		Rep: Predicted protein - Sclerotinia sclerotiorum (strain ATCC 18683 / 1980 / Ss-1) (Whitemold) (Whetzelinia sclerotiorum), partial (18%) [TC422760]			chr3:84743091-84743032
A_73_P245596	0.0312476	0.04496	1.71033	up	CLEC4D	Bos taurus C-type lectin domain family 4, member D (CLEC4D), mRNA [NM_001193117]	NM_001193117	C-type lectin domain family 4, member D	chr5:102151927-102152489	NM_001193117
A_73_P089961	0.0165685	0.039183	1.72901	up	NCAPD2	Bos taurus non-SMC condensin I complex, subunit D2 (NCAPD2), mRNA [NM_001206711]	NM_001206711	non-SMC condensin I complex, subunit D2	chr5:104244652-104244593	NM_001206711
A_73_P150601	0.0323636	0.0451668	1.55724	up	PKIB	Bos taurus protein kinase (cAMP-dependent, catalytic) inhibitor beta (PKIB), mRNA [NM_001114518]	NM_001114518	protein kinase (cAMP-dependent, catalytic) inhibitor beta	chr9:28881076-28881017	NM_001114518
A_73_P037196	0.0276771	0.0434505	3.29714	up	CHN1	Bos taurus chimerin (chimaerin) 1 (CHN1), transcript variant 1, mRNA [NM_001075349]	NM_001075349	chimerin (chimaerin) 1	chr2:22081061-22081120	NM_001075349
A_73_111502	0.0443622	0.0485985	1.7644	up	PBRM1	PREDICTED: Bos taurus polybromo 1 (PBRM1), mRNA [XM_583018]	XM_583018	polybromo 1	chr22:48836382-48836441	XM_583018
A_73_106645	0.0185638	0.0397356	2.09352	up	MSMO1	Bos taurus methylsterol monooxygenase 1 (MSMO1), mRNA [NM_001098863]	NM_001098863	methylsterol monooxygenase 1	chr17:505623-505682	NM_001098863
A_73_121449	0.0298611	0.0443764	2.40961	up		Rep: Predicted protein - Aspergillus oryzae, partial (6%) [TC408820]			chr21:69476436-69476495
A_73_P048031	0.0338488	0.0455331	1.58408	up	ALOX5AP	Bos taurus arachidonate 5-lipoxygenase-activating protein (ALOX5AP), mRNA [NM_001076293]	NM_001076293	arachidonate 5-lipoxygenase-activating protein	chr12:30137061-30137002	NM_001076293
A_73_P074881	0.0353388	0.0460676	1.53038	up	CASP1	Bos taurus Casp1 mRNA for caspase-1, partial cds. [AB285205]	AB285205	caspase 1, apoptosis-related cysteine peptidase (interleukin 1, beta, convertase)	chr15:3472093-3472152	XM_002692921
A_73_P066936	0.0227813	0.0415352	1.57435	up	N4BP1	Bos taurus NEDD4 binding protein 1 (N4BP1), mRNA [NM_001191433]	NM_001191433	NEDD4 binding protein 1	chr18:17033419-17033360	NM_001191433
A_73_109102	0.0251236	0.0427077	4.30286	up		Uncharacterized protein [Source:UniProtKB/TrEMBL;Acc:F1N6D1] [ENSBTAT00000048097]	BC148021		chr19:14639924-14639865	XM_003583536
A_73_P078006	0.00543291	0.0314574	2.20968	up	PLXNB3	plexin B3 [Source:HGNC Symbol;Acc:9105] [ENSBTAT00000013391]	XM_580392	plexin B3	chrX:39910653-39910712	XM_002699723
A_73_115119	0.0315197	0.04496	3.72283	up		Rep: Uncharacterized protein ENSP00000375250 - Homo sapiens (Human), partial (13%) [TC418188]			chr24:45140651-45140710
A_73_P051886	0.0154036	0.0390737	1.75721	up	CPM	carboxypeptidase D [Source:RefSeq peptide;Acc:NP_001094556] [ENSBTAT00000017941]	BC151504	carboxypeptidase M	chr5:45158626-45158685	XM_003582207
A_73_P254656	0.00182039	0.0235268	1.62597	up	HMGCR	Bos taurus 3-hydroxy-3-methylglutaryl-CoA reductase (HMGCR), mRNA [NM_001105613]	NM_001105613	3-hydroxy-3-methylglutaryl-CoA reductase	chr10:6712621-6712680	NM_001105613
A_73_P050466	0.033654	0.0454507	1.52533	up	S100A12	Bos taurus S100 calcium binding protein A12 (S100A12), mRNA [NM_174651]	NM_174651	S100 calcium binding protein A12	chr3:17165200-17165259	NM_174651
A_73_P081916	0.00566839	0.0315179	1.50015	up		WD repeat domain 27 [Source:HGNC Symbol;Acc:21248] [ENSBTAT00000061523]	XM_002705262		chr9:105027746-105013059	XM_002690399
A_73_120398	0.0378851	0.0467603	2.50976	up	ACAD11	Bos taurus acyl-CoA dehydrogenase family, member 11 (ACAD11), mRNA [NM_001075893]	NM_001075893	acyl-CoA dehydrogenase family, member 11	chr1:138015583-138015642	NM_001075893
A_73_P063986	0.0239269	0.0420167	1.94179	up	CYB5A	Bos taurus cytochrome b5 type A (microsomal) (CYB5A), mRNA [NM_174033]	NM_174033	cytochrome b5 type A (microsomal)	chr24:4445620-4445679	NM_174033
A_73_P202847	0.0154449	0.0390737	3.1953	up	SPIC	Bos taurus Spi-C transcription factor (Spi-1/PU.1 related) (SPIC), mRNA [NM_001076421]	NM_001076421	Spi-C transcription factor (Spi-1/PU.1 related)	chr5:65676125-65676184	NM_001076421
A_73_109292	0.0265821	0.0430799	1.54593	up	LOC510844	Uncharacterized protein [Source:UniProtKB/TrEMBL;Acc:E1BPV9] [ENSBTAT00000019489]	XM_003583394	zinc finger homeobox protein 3-like	chr18:38491621-38491680	XM_003583394
A_73_104100	0.0272447	0.0433284	2.08267	up					chr2:19612662-19612721
A_73_101732	0.0313776	0.04496	2.22796	up	GMPR	Bos taurus guanosine monophosphate reductase (GMPR), mRNA [NM_001075977]	NM_001075977	guanosine monophosphate reductase	chr23:40616699-40616640	NM_001075977
A_73_113928	0.00865518	0.0351263	2.17928	up		BovGen_07461 normal cattle brain Bos taurus cDNA clone RZPDp1056N0218Q 5', mRNA sequence [CO879135]	CO879135		chr13:38285384-38285443
A_73_P113611	0.0280611	0.0435953	2.06093	up		syntaxin 2 [Source:HGNC Symbol;Acc:3403] [ENSBTAT00000061491]	BC118465		chr17:47331028-47331087	XM_003583302
A_73_100249	0.00126015	0.0213945	2.88391	up	DSTN	Bos taurus destrin (actin depolymerizing factor) (DSTN), mRNA [NM_001015586]	NM_001015586	destrin (actin depolymerizing factor)	chr13:38279565-38279624	NM_001015586
A_73_117359	0.0151892	0.0389548	2.03546	up					chr23:19386593-19386534
A_73_P281601	0.0282661	0.0435953	2.26227	up	KLHL7	Bos taurus kelch-like 7 (Drosophila) (KLHL7), mRNA [NM_001076037]	NM_001076037	kelch-like 7 (Drosophila)	chr4:31921977-31922036	NM_001076037
A_73_119837	0.00140862	0.0224718	5.36807	up	LAMB1	Bos taurus laminin, beta 1 (LAMB1), mRNA [NM_001206519]	NM_001206519	laminin, beta 1	chr4:49263572-49263513	NM_001206519
A_73_P349011	0.00429446	0.0301621	2.61607	up	PSME4	Bos taurus proteasome (prosome, macropain) activator subunit 4 (PSME4), mRNA [NM_001205952]	NM_001205952	proteasome (prosome, macropain) activator subunit 4	chr11:36430279-36430220	NM_001205952
A_73_P072346	0.0387502	0.0471667	2.65275	up	XPR1	Bos taurus xenotropic and polytropic retrovirus receptor 1 (XPR1), mRNA [NM_001192883]	NM_001192883	xenotropic and polytropic retrovirus receptor 1	chr16:63502012-63502071	NM_001192883
A_73_P288436	0.0114922	0.0374277	1.65795	up	FRMD4B	Bos taurus FERM domain containing 4B (FRMD4B), mRNA [NM_001102099]	NM_001102099	FERM domain containing 4B	chr22:32497751-32497810	NM_001102099
A_73_116753	0.000602	0.0181226	2.68191	up	KIAA1009	Bos taurus KIAA1009 ortholog (KIAA1009), mRNA [NM_001206593]	NM_001206593	KIAA1009 ortholog	chr9:66210911-66210970	NM_001206593
A_73_100808	0.00170328	0.0231873	1.77401	up	PTPRR	Bos taurus protein tyrosine phosphatase, receptor type, R (PTPRR), transcript variant 1, mRNA [NM_001015662]	NM_001015662	protein tyrosine phosphatase, receptor type, R	chr5:43112627-43112686	NM_001015662
A_73_P197282	0.0347242	0.0457847	1.51483	up	BACH1	Uncharacterized protein [Source:UniProtKB/TrEMBL;Acc:E1BJL3] [ENSBTAT00000005416]	XM_002684612	BTB and CNC homology 1, basic leucine zipper transcription factor 1	chr1:6167192-6158022	XM_002684612
A_73_P500699	0.0488867	0.0497944	1.77168	up		Rep: GatB/Yqey domain protein - Syntrophobacter fumaroxidans (strain DSM 10017 / MPOB), partial (7%) [TC469257]	XM_863952		chr3:94600174-94600115	XM_863952
A_73_P292076	0.00714427	0.033759	11.0099	up	CA4	Bos taurus carbonic anhydrase IV (CA4), mRNA [NM_173897]	NM_173897	carbonic anhydrase IV	chr19:13109944-13109885	NM_173897
A_73_P105411	0.0402576	0.0474259	2.20071	up	CCDC88A	Bos taurus coiled-coil domain containing 88A (CCDC88A), mRNA [NM_001206209]	NM_001206209	coiled-coil domain containing 88A	chr11:37906832-37906773	NM_001206209
A_73_P432691	0.0486559	0.0497274	2.07803	up		Rep: ABC transporter, ATP-binding protein - Sorangium cellulosum (strain So ce56) (Polyangium cellulosum (strainSo ce56)), partial (6%) [TC418343]			chr25:16554518-16554459
A_73_P268901	0.0399664	0.0474259	1.92568	up	C20H5orf42	PREDICTED: Bos taurus chromosome 20 open reading frame, human C5orf42 (C20H5orf42), mRNA [XM_613463]	XM_613463	chromosome 20 open reading frame, human C5orf42	chr20:37107651-37109178	XM_002696374
A_73_P368016	0.0347343	0.0457847	1.62339	up	HERC4	Bos taurus HECT and RLD domain containing E3 ubiquitin protein ligase 4 (HERC4), mRNA [NM_001076894]	NM_001076894	HECT and RLD domain containing E3 ubiquitin protein ligase 4	chr28:24596898-24596839	NM_001076894
A_73_107122	0.0162236	0.039183	1.66831	up		Rep: Glucocorticoid-induced transcript 1 protein - Homo sapiens (Human), partial (13%) [TC455674]	XM_614289		chr4:17143519-17143578	XM_614289
A_73_P210002	0.0127191	0.0381385	2.20267	up	CDO1	Bos taurus cysteine dioxygenase, type I (CDO1), mRNA [NM_001034465]	NM_001034465	cysteine dioxygenase, type I	chr10:4600015-4599118	NM_001034465
A_73_104289	0.0113383	0.0374277	1.59065	up	SCARB2	Bos taurus scavenger receptor class B, member 2 (SCARB2), mRNA [NM_001102153]	NM_001102153	scavenger receptor class B, member 2	chr6:92797938-92797879	NM_001102153
A_73_120026	0.0116894	0.0376985	1.91314	up	SERINC2	Bos taurus serine incorporator 2 (SERINC2), mRNA [NM_001035285]	NM_001035285	serine incorporator 2	chr2:122817661-122817720	NM_001035285
A_73_101188	0.0382223	0.0469333	1.52723	up	STRN	Bos taurus striatin, calmodulin binding protein (STRN), mRNA [NM_001206104]	NM_001206104	striatin, calmodulin binding protein	chr11:19337749-19337690	NM_001206104
A_73_109541	0.00628475	0.0322331	1.62928	up					chr25:018839446-018839505
A_73_P068282	0.0403857	0.0474259	2.40987	up		PREDICTED: Bos taurus zinc finger protein 347-like (LOC100851792), miscRNA [XR_138955]	XR_138955		chr18:59712104-59712163	XM_003583488
A_73_P032673	0.0281604	0.0435953	1.6288	up	WTAP	Bos taurus Wilms tumor 1 associated protein (WTAP), transcript variant 1, mRNA [NM_001113254]	NM_001113254	Wilms tumor 1 associated protein	chr9:97459892-97459951	NM_001113254
A_73_P130161	0.00500937	0.0308106	3.11948	up	LOC782062	PREDICTED: Bos taurus leukocyte immunoglobulin-like receptor, subfamily B, member 5-like (LOC782062), mRNA [XM_003585344]	XM_003585344	leukocyte immunoglobulin-like receptor, subfamily B, member 5-like	chr18:63199950-63200009	XM_003585344
A_73_P412691	0.00218599	0.0243923	1.6897	up	IGLL1	Bos taurus immunoglobulin lambda-like polypeptide 1 (IGLL1), mRNA [NM_001083800]	NM_001083800	immunoglobulin lambda-like polypeptide 1	chr17:073152647-073152704	NM_001083800
A_73_114241	0.00863246	0.0351263	1.59449	up	CDK3	Bos taurus cyclin-dependent kinase 3 (CDK3), mRNA [NM_001099178]	NM_001099178	cyclin-dependent kinase 3	chr19:56275661-56275602	NM_001099178
A_73_112783	0.00879079	0.0351263	2.78739	up		Rep: Homer protein homolog 1 - Bos taurus (Bovine), complete [TC392383]			chr10:10349713-10349654
A_73_118792	0.0208438	0.0408446	2.01434	up	ARSB	Bos taurus arylsulfatase B (ARSB), mRNA [NM_001101175]	NM_001101175	arylsulfatase B	chr10:9789473-9789414	NM_001101175
A_73_111161	0.0118702	0.0377945	39.9919	up	EXOC3L4	Bos taurus exocyst complex component 3-like 4 (EXOC3L4), mRNA [NM_001205930]	NM_001205930	exocyst complex component 3-like 4	chr21:69428089-69428148	NM_001205930
A_73_P511868	0.0159	0.039183	2.1373	up		JID602700865.R1 CSEQFXL15 thyroid and parathyroid Bos taurus cDNA, mRNA sequence [CB171346]	CB171346		chr6:108853079-108853034
A_73_P306096	0.0284217	0.0435953	5.40735	up	LPL	Bos taurus lipoprotein lipase (LPL), mRNA [NM_001075120]	NM_001075120	lipoprotein lipase	chr8:67510021-67510080	NM_001075120
A_73_P093441	0.0117046	0.0376985	2.44242	up	ZFYVE9	zinc finger, FYVE domain containing 9 [Source:HGNC Symbol;Acc:6775] [ENSBTAT00000063202]	XM_863952	zinc finger, FYVE domain containing 9	chr3:94600483-94600424	XM_863952
A_73_P439076	0.0326025	0.0451668	2.58013	up	GIN1	Bos taurus gypsy retrotransposon integrase 1 (GIN1), mRNA [NM_001024473]	NM_001024473	gypsy retrotransposon integrase 1	chr7:104538449-104538301	NM_001024473
A_73_P428671	0.00664279	0.0328978	1.75748	up	ORC2	Bos taurus origin recognition complex, subunit 2 (ORC2), mRNA [NM_001101942]	NM_001101942	origin recognition complex, subunit 2	chr2:89990649-89989809	NM_001101942
A_73_P459291	0.0240814	0.042085	1.64715	up	PBRM1	Bos taurus polybromo 1, mRNA (cDNA clone IMAGE:8085719), partial cds. [BC113295]	BC113295	polybromo 1	chr22:48834072-48834131	XM_002697017
A_73_P261406	0.00616949	0.0322331	2.33057	up	COMMD10	Bos taurus COMM domain containing 10 (COMMD10), mRNA [NM_001083489]	NM_001083489	COMM domain containing 10	chr7:38950443-38950384	NM_001083489
A_73_P035821	0.00180983	0.0235268	4.21361	up	RASGEF1C	Bos taurus RasGEF domain family, member 1C (RASGEF1C), mRNA [NM_001103259]	NM_001103259	RasGEF domain family, member 1C	chr7:1013435-1013494	NM_001103259
A_73_118297	0.0362812	0.0465199	3.32567	up	BROX	Bos taurus BRO1 domain and CAAX motif containing (BROX), mRNA [NM_001205894]	NM_001205894	BRO1 domain and CAAX motif containing	chr16:26927655-26927714	NM_001205894
A_73_103750	0.0489528	0.0497944	2.17406	up	CSGALNACT2	Bos taurus chondroitin sulfate N-acetylgalactosaminyltransferase 2 (CSGALNACT2), mRNA [NM_001205653]	NM_001205653	chondroitin sulfate N-acetylgalactosaminyltransferase 2	chr28:13677971-13678030	NM_001205653
A_73_P093136	0.00367385	0.0288784	2.36783	up	CRYZ	Bos taurus crystallin, zeta (quinone reductase) (CRYZ), mRNA [NM_174025]	NM_174025	crystallin, zeta (quinone reductase)	chr3:70274501-70274560	NM_174025
A_73_102139	0.0369499	0.046603	1.76594	up		C61751A FLM Bos taurus cDNA clone C6175 3', mRNA sequence [EE929813]	EE929813		chr10:104003765-104003706
A_73_P478588	0.000346	0.0178726	1.69983	up	ACAD11	Bos taurus acyl-CoA dehydrogenase family, member 11 (ACAD11), mRNA [NM_001075893]	NM_001075893	acyl-CoA dehydrogenase family, member 11	chr1:138091064-138091994	NM_001075893
A_73_P364721	0.0104456	0.0366494	1.83818	up	FEZ2	Bos taurus fasciculation and elongation protein zeta 2 (zygin II) (FEZ2), transcript variant 2, mRNA [NM_001205335]	NM_001205335	fasciculation and elongation protein zeta 2 (zygin II)	chr11:19075227-19075168	NM_001205335
A_73_119435	0.0464355	0.0489689	1.58648	up	CLIC4	Bos taurus chloride intracellular channel 4 (CLIC4), nuclear gene encoding mitochondrial protein, mRNA [NM_001080218]	NM_001080218	chloride intracellular channel 4	chr2:128710532-128710473	NM_001080218
A_73_P074971	0.0353967	0.0460676	2.16112	up		KDEL (Lys-Asp-Glu-Leu) containing 2 [Source:HGNC Symbol;Acc:28496] [ENSBTAT00000011476]	DV931389		chr15:18417898-18417839	XM_002692967
A_73_118444	0.0430745	0.0482236	2.19304	up					chr5:7678212-7678271
A_73_P040971	0.00272322	0.0264938	2.65418	up	SEZ6L2	Bos taurus seizure related 6 homolog (mouse)-like 2 (SEZ6L2), mRNA [NM_001045927]	NM_001045927	seizure related 6 homolog (mouse)-like 2	chr25:26639071-26640146	NM_001045927
A_73_P072331	0.0029917	0.0273949	1.74649	up	TOR1AIP1	torsin-1A-interacting protein 1 [Source:RefSeq peptide;Acc:NP_001073813] [ENSBTAT00000033967]		torsin A interacting protein 1	chr16:62577353-62577412
A_73_P080411	0.00275317	0.0265204	2.00505	up	MPP5	Bos taurus membrane protein, palmitoylated 5 (MAGUK p55 subfamily member 5) (MPP5), mRNA [NM_001205951]	NM_001205951	membrane protein, palmitoylated 5 (MAGUK p55 subfamily member 5)	chr10:79579271-79579330	NM_001205951
A_73_P078726	0.00361598	0.0286777	2.23683	up	PIGA	phosphatidylinositol glycan anchor biosynthesis, class A [Source:HGNC Symbol;Acc:8957] [ENSBTAT00000010060]	XM_002700395	phosphatidylinositol glycan anchor biosynthesis, class A	chrX:135430606-135430665	XM_002700395
A_73_106944	0.0148662	0.0386711	2.37452	up	CRIP3	Bos taurus cysteine-rich protein 3 (CRIP3), mRNA [NM_001192689]	NM_001192689	cysteine-rich protein 3	chr23:16873185-16873033	NM_001192689
A_73_P114226	0.0363165	0.0465199	2.10024	up	UCHL3	Bos taurus ubiquitin carboxyl-terminal esterase L3 (ubiquitin thiolesterase) (UCHL3), mRNA [NM_001040541]	NM_001040541	ubiquitin carboxyl-terminal esterase L3 (ubiquitin thiolesterase)	chr12:50997358-50997417	NM_001040541
A_73_113841	0.0347135	0.0457847	1.62472	up					chr4:67761886-67761827
A_73_P447831	0.0470267	0.0491997	2.64195	up	CHN1	Bos taurus chimerin (chimaerin) 1 (CHN1), transcript variant 1, mRNA [NM_001075349]	NM_001075349	chimerin (chimaerin) 1	chr2:22080493-22080552	NM_001075349
A_73_103968	0.000627	0.0181226	3.20019	up					chr15:52497277-52497218
A_73_112891	0.0200497	0.0402776	1.86696	up	PHACTR2	phosphatase and actin regulator 2 [Source:HGNC Symbol;Acc:20956] [ENSBTAT00000037722]	XM_600433	phosphatase and actin regulator 2	chr9:82330143-82330202	XM_600433
A_73_111729	0.0462863	0.048938	1.57482	up		Mdm1 nuclear protein homolog (mouse) [Source:HGNC Symbol;Acc:29917] [ENSBTAT00000026305]	XM_003582208		chr5:45673088-45673147	XM_003582208
A_73_P320471	0.0155574	0.0391379	2.92185	up	TMEM2	Bos taurus transmembrane protein 2 (TMEM2), mRNA [NM_001192415]	NM_001192415	transmembrane protein 2	chr8:48261365-48261306	NM_001192415
A_73_113839	0.0276791	0.0434505	2.52932	up	SLC24A3	solute carrier family 24 (sodium/potassium/calcium exchanger), member 3 [Source:HGNC Symbol;Acc:10977] [ENSBTAT00000015768]	XM_868421	solute carrier family 24 (sodium/potassium/calcium exchanger), member 3	chr13:39608224-39608283	XM_868421
A_73_P081366	0.014079	0.0385974	1.53595	up	RRAGD	Bos taurus Ras-related GTP binding D (RRAGD), mRNA [NM_001192828]	NM_001192828	Ras-related GTP binding D	chr9:61743444-61743503	NM_001192828
A_73_119727	0.0232078	0.0418408	2.38995	up	LOC534587	lin-9 homolog (C. elegans) [Source:HGNC Symbol;Acc:30830] [ENSBTAT00000047257]	BI775146	protein lin-9 homolog	chr16:30053947-30052615	XM_003583225
A_73_P064156	0.00880344	0.0351263	1.63165	up		oxysterol binding protein-like 1A [Source:HGNC Symbol;Acc:16398] [ENSBTAT00000007419]	EH201852		chr24:32896764-32896823	XM_002697723
A_73_P249721	0.0448852	0.0486251	2.29681	up	PROX1	Bos taurus prospero homeobox 1 (PROX1), mRNA [NM_001193232]	NM_001193232	prospero homeobox 1	chr16:71414139-71414080	NM_001193232
A_73_P311126	0.0414184	0.0477563	1.52028	up	SPPL2A	signal peptide peptidase like 2A [Source:HGNC Symbol;Acc:30227] [ENSBTAT00000015701]	XM_608794	signal peptide peptidase-like 2A	chr10:59812867-59812925	XM_608794
A_73_107598	0.0431153	0.0482419	1.6868	up		Rep: A86L protein - Paramecium bursaria Chlorella virus 1 (PBCV-1), partial (20%) [TC445363]			chr7:24298048-24298107
A_73_116819	0.0207742	0.0408446	2.43331	up		Rep: Guanylate cyclase soluble subunit alpha-1 - Bos taurus (Bovine), complete [TC407473]			chr17:44600542-44600483
A_73_P039291	0.0399538	0.0474259	2.63615	up	PEX11A	Bos taurus peroxisomal biogenesis factor 11 alpha (PEX11A), mRNA [NM_001075721]	NM_001075721	peroxisomal biogenesis factor 11 alpha	chr21:21523753-21523694	NM_001075721
A_73_112128	0.0361339	0.0465199	1.76378	up	UROS	Bos taurus uroporphyrinogen III synthase (UROS), mRNA [NM_001191369]	NM_001191369	uroporphyrinogen III synthase	chr26:45635934-45635875	NM_001191369
A_73_P127506	0.00214126	0.0243923	1.88422	up	NRP1	Bos taurus neuropilin 1 (NRP1), mRNA [NM_001205660]	NM_001205660	neuropilin 1	chr13:20059122-20059181	NM_001205660
A_73_112726	0.000506	0.0181226	1.88973	up		Rep: Taste receptor type 2 - Bos taurus (Bovine), partial (25%) [TC407648]			chr15:18415642-18415583
A_73_119071	0.0139954	0.0385974	3.00712	up		Rep: MGC137916 protein - Bos taurus (Bovine), partial (33%) [TC472582]			chr25:13657712-13657771
A_73_P215167	0.00649092	0.0327743	1.505	up		Rep: LON peptidase N-terminal domain and RING finger protein 3 (RING finger protein 127). - Canis familiaris, partial (28%) [TC466345]			chrX:3274430-3274489
A_73_P094911	0.0438944	0.0484757	1.95048	up	INO80D	Bos taurus INO80 complex subunit D (INO80D), mRNA [NM_001205940]	NM_001205940	INO80 complex subunit D	chr2:94807027-94800051	NM_001205940
A_73_P078846	0.0477662	0.0494617	2.30958	up	ANKRD31	PREDICTED: Bos taurus ankyrin repeat domain 31 (ANKRD31), mRNA [XM_593928]	XM_593928	ankyrin repeat domain 31	chr10:6470774-6470715	XM_002690414
A_73_P308996	0.00193529	0.0236639	2.32368	up		PTPRF interacting protein, binding protein 2 (liprin beta 2) [Source:HGNC Symbol;Acc:9250] [ENSBTAT00000021483]	XM_003583112		chr15:45671179-45671120	XM_003583112
A_73_120315	0.0402909	0.0474259	1.91907	up	EXOC5	Bos taurus exocyst complex component 5 (EXOC5), mRNA [NM_001192711]	NM_001192711	exocyst complex component 5	chr10:69864112-69864053	NM_001192711
A_73_P466483	0.000647	0.0181226	2.26836	up	SGOL1	Bos taurus shugoshin-like 1 (S. pombe) (SGOL1), mRNA [NM_001081617]	NM_001081617	shugoshin-like 1 (S. pombe)	chr1:44963741-44963682	NM_001081617
A_73_P105476	0.00625999	0.0322331	1.78177	up		Bos taurus cDNA clone IMAGE:8629062, partial cds. [BC149877]	BC149877		chr21:20355803-20355744	XM_002696546
A_73_119127	0.01194	0.0377945	1.95255	up	SHCBP1L	Bos taurus SHC SH2-domain binding protein 1-like (SHCBP1L), mRNA [NM_001046290]	NM_001046290	SHC SH2-domain binding protein 1-like	chr16:65424740-65424681	NM_001046290
A_73_P415876	0.0311266	0.04496	1.85185	up	NLN	Bos taurus neurolysin (metallopeptidase M3 family) (NLN), nuclear gene encoding mitochondrial protein, mRNA [NM_001033989]	NM_001033989	neurolysin (metallopeptidase M3 family)	chr20:13718428-13718369	NM_001033989
A_73_P100541	0.0405242	0.0474259	2.24791	up	GHSR	Bos taurus growth hormone secretagogue receptor (GHSR), mRNA [NM_001143736]	NM_001143736	growth hormone secretagogue receptor	chr1:95799102-95799161	NM_001143736
A_73_P082156	0.0403691	0.0474259	2.12973	up	LOXL3	Bos taurus lysyl oxidase-like 3 (LOXL3), mRNA [NM_001192969]	NM_001192969	lysyl oxidase-like 3	chr11:10089035-10089276	NM_001192969
A_73_P073991	0.044547	0.0486199	2.64588	up	MCM8	Bos taurus minichromosome maintenance complex component 8 (MCM8), mRNA [NM_001193036]	NM_001193036	minichromosome maintenance complex component 8	chr13:48532446-48532505	NM_001193036
A_73_P266796	0.0492593	0.0498451	1.70828	up	RASD2	Bos taurus RASD family, member 2 (RASD2), mRNA [NM_001081594]	NM_001081594	RASD family, member 2	chr5:74115280-74115339	NM_001081594
A_73_P125101	0.0139222	0.0385974	2.02189	up		LB02618.CR_D23 GC_BGC-26 Bos taurus cDNA clone IMAGE:8216425, mRNA sequence [DV881326]	DV881326		chr19:26251380-26251320
A_73_P366361	0.00014	0.0162196	2.22496	up	SPATS2L	Bos taurus spermatogenesis associated, serine-rich 2-like (SPATS2L), mRNA [NM_001192987]	NM_001192987	spermatogenesis associated, serine-rich 2-like	chr2:89439489-89439548	NM_001192987
A_73_113419	0.00527374	0.0314574	1.80253	up	PDE4DIP	phosphodiesterase 4D interacting protein [Source:RefSeq peptide;Acc:NP_001095372] [ENSBTAT00000061284]	BC154385	phosphodiesterase 4D interacting protein	chr3:22916631-22916572
A_73_P337821	0.000307	0.0178726	1.83243	up		spectrin repeat containing, nuclear envelope 1 [Source:HGNC Symbol;Acc:17089] [ENSBTAT00000012328]	BC149857		chr9:90277309-90277250	XM_001787739
A_73_P050616	0.0246462	0.0424617	2.41194	up	ZNF502	Bos taurus zinc finger protein 502 (ZNF502), mRNA [NM_001103101]	NM_001103101	zinc finger protein 502	chr22:16523697-16523756	NM_001103101
A_73_P050341	0.0304265	0.0445714	1.79864	up	FYTTD1	Bos taurus forty-two-three domain containing 1 (FYTTD1), mRNA [NM_001001137]	NM_001001137	forty-two-three domain containing 1	chr1:70954820-70954761	NM_001001137
A_73_105318	0.000697	0.0192395	5.09884	up	RGNEF	Bos taurus 190 kDa guanine nucleotide exchange factor (RGNEF), mRNA [NM_001102307]	NM_001102307	190 kDa guanine nucleotide exchange factor	chr20:7603385-7603326	NM_001102307
A_73_P455751	0.0241598	0.042085	2.57507	up	CUL4B	cullin 4B [Source:HGNC Symbol;Acc:2555] [ENSBTAT00000024713]	XM_588651	cullin 4B	chrX:4754028-4754087	XM_002699510
A_73_P464983	0.0289312	0.0439822	1.75484	up		HW_liver_54_050811_E12 Bos taurus CF-24-HW liver cDNA library Bos taurus cDNA, mRNA sequence [DV790541]	DV790541		chr8:44046008-44045949	XM_002689629
A_73_P078361	0.0115751	0.0376374	2.49616	up		4057674 BARC 8BOV Bos taurus cDNA clone 8BOV_3P02 5', mRNA sequence [CK833674]	CK833674		chrX:84360066-84359711	XM_605075
A_73_P330796	0.0459243	0.0489114	2.01121	up	MSMO1	Bos taurus methylsterol monooxygenase 1 (MSMO1), mRNA [NM_001098863]	NM_001098863	methylsterol monooxygenase 1	chr17:504859-504918	NM_001098863
A_73_P070371	0.037846	0.0467603	1.87792	up		LPS-responsive vesicle trafficking, beach and anchor containing [Source:HGNC Symbol;Acc:1742] [ENSBTAT00000061161]	XM_002694326		chr17:7533388-7533447	XM_002694326
A_73_117476	0.025244	0.0427077	1.51661	up	PPBP	pro-platelet basic protein (chemokine (C-X-C motif) ligand 7) [Source:HGNC Symbol;Acc:9240] [ENSBTAT00000046001]	XM_864771	pro-platelet basic protein (chemokine (C-X-C motif) ligand 7)	chr6:90665470-90665529	XM_864771
A_73_P087831	0.0461519	0.0489114	1.95326	up	SDAD1	Bos taurus SDA1 domain containing 1 (SDAD1), mRNA [NM_001102489]	NM_001102489	SDA1 domain containing 1	chr6:92556195-92551944	NM_001102489
A_73_P103186	0.0464509	0.0489689	1.87076	up	ACBD5	Bos taurus acyl-CoA binding domain containing 5 (ACBD5), mRNA [NM_181038]	NM_181038	acyl-CoA binding domain containing 5	chr13:18063027-18062968	NM_181038
A_73_109067	0.0136714	0.0385974	2.46559	up		1616421 MARC 11BOV Bos taurus cDNA 5', mRNA sequence [EB726659]	EB726659		chr20:62427709-62427768	XM_601963
A_73_108260	0.0278693	0.0434877	4.39694	up	LPL	Bos taurus lipoprotein lipase (LPL), mRNA [NM_001075120]	NM_001075120	lipoprotein lipase	chr8:67510727-67510786	NM_001075120
A_73_P361046	0.0136955	0.0385974	1.57365	up	TPMT	Bos taurus thiopurine S-methyltransferase (TPMT), mRNA [NM_001075531]	NM_001075531	thiopurine S-methyltransferase	chr23:39224522-39224581	NM_001075531
A_73_106972	0.0405673	0.0474259	1.58303	up	PRODH	Bos taurus proline dehydrogenase (oxidase) 1 (PRODH), nuclear gene encoding mitochondrial protein, mRNA [NM_001075185]	NM_001075185	proline dehydrogenase (oxidase) 1	chr17:74054408-74054349	NM_001075185
A_73_114608	0.0373804	0.046603	2.48131	up	BLZF1	Bos taurus basic leucine zipper nuclear factor 1 (BLZF1), mRNA [NM_001045899]	NM_001045899	basic leucine zipper nuclear factor 1	chr16:37860822-37860881	NM_001045899
A_73_P094461	0.0162601	0.039183	4.88294	up	IFIH1	PREDICTED: Bos taurus interferon induced with helicase C domain 1 (IFIH1), mRNA [XM_615590]	XM_615590	interferon induced with helicase C domain 1	chr2:34272453-34272512	XM_615590
A_73_P331461	0.0440162	0.0484757	1.57675	up	SEPP1	Bos taurus selenoprotein P, plasma, 1 (SEPP1), mRNA [NM_174459]	NM_174459	selenoprotein P, plasma, 1	chr20:31793223-31793283	NM_174459
A_73_P103371	0.0383888	0.047081	1.74355	up	KIF5B	Bos taurus kinesin family member 5B (KIF5B), mRNA [NM_001192365]	NM_001192365	kinesin family member 5B	chr13:33640013-33640072	NM_001192365
A_73_P399651	0.030855	0.044876	1.67621	up		Rep: Teashirt homolog 3 (Zinc finger protein 537). - Canis familiaris, partial (12%) [TC447423]	XM_003587231		chr18:41991293-41991234	XM_003587231
A_73_118370	0.0208958	0.0408446	1.54656	up	GPSM2	Bos taurus G-protein signaling modulator 2 (GPSM2), mRNA [NM_001192355]	NM_001192355	G-protein signaling modulator 2	chr3:34545937-34545878	NM_001192355
A_73_P378931	0.027867	0.0434877	2.33558	up	ZFP62	PREDICTED: Bos taurus zinc finger protein 62 homolog (mouse) (ZFP62), mRNA [XM_583727]	XM_583727	zinc finger protein 62 homolog (mouse)	chr7:41404253-41404242	XM_002689031
A_73_P059196	0.0471955	0.0492961	1.58254	up	RUFY2	Bos taurus RUN and FYVE domain containing 2 (RUFY2), mRNA [NM_001206707]	NM_001206707	RUN and FYVE domain containing 2	chr28:24941702-24940251	NM_001206707
A_73_P067446	0.0270249	0.0432443	1.72715	up	ZNF382	Bos taurus zinc finger protein 382 (ZNF382), mRNA [NM_001191438]	NM_001191438	zinc finger protein 382	chr18:47152376-47152317	NM_001191438
A_73_P078376	0.0179599	0.0397356	2.92275	up		Uncharacterized protein [Source:UniProtKB/TrEMBL;Acc:F1MF62] [ENSBTAT00000061423]	DN534598		chrX:84504388-84504329	XM_002700041
A_73_P377105	0.0340057	0.0455931	1.51917	up	SLMO2	Bos taurus slowmo homolog 2 (Drosophila) (SLMO2), mRNA [NM_001035476]	NM_001035476	slowmo homolog 2 (Drosophila)	chr13:57861993-57862165	NM_001035476
A_73_P112156	0.00193225	0.0236639	3.40165	up	CRLF2	cytokine receptor-like factor 2 [Source:HGNC Symbol;Acc:14281] [ENSBTAT00000026955]	XM_608251	cytokine receptor-like factor 2	chr29:50372396-50372337	XM_608251
A_73_P101626	0.000295	0.0177679	2.69302	up	HMMR	Bos taurus hyaluronan-mediated motility receptor (RHAMM) (HMMR), mRNA [NM_001206621]	NM_001206621	hyaluronan-mediated motility receptor (RHAMM)	chr7:77287503-77287562	NM_001206621
A_73_108860	0.020345	0.0405028	2.25361	up	PANX1	Bos taurus pannexin 1 (PANX1), mRNA [NM_001245925]	NM_001245925	pannexin 1	chr29:591531-591472	NM_001245925
A_73_P494128	0.0385099	0.0471218	1.87594	up		Rep: Rogdi protein - Xenopus tropicalis (Western clawed frog) (Silurana tropicalis), partial (6%) [TC477063]			chr11:28873108-28873167
A_73_P071951	0.0205856	0.0406536	1.69932	up		kinesin family member 1B [Source:HGNC Symbol;Acc:16636] [ENSBTAT00000006538]	EH198735		chr16:44081521-44081175	XM_002694045
A_73_P052631	0.00450389	0.0301699	2.5022	up		GB
A_73_P250036	0.0188048	0.039827	1.65995	up		Bos taurus TNFAIP3 interacting protein 2, mRNA (cDNA clone MGC:157398 IMAGE:8387795), complete cds. [BC149434]	BC149434		chr6:108124403-108124462	XM_003583981
A_73_P085311	0.00974678	0.0357966	2.36886	up					chr7:054123129-054123188
A_73_P085711	0.0453359	0.0486251	2.10191	up	SLCO4C1	Bos taurus solute carrier organic anion transporter family, member 4C1 (SLCO4C1), mRNA [NM_001192846]	NM_001192846	solute carrier organic anion transporter family, member 4C1	chr7:103696362-103694688	NM_001192846
A_73_106428	0.00448842	0.0301699	1.50536	up					chr10:38299162-38299104
A_73_108071	0.0445681	0.0486199	1.76664	up	PSMA4	Bos taurus proteasome (prosome, macropain) subunit, alpha type, 4 (PSMA4), mRNA [NM_001034381]	NM_001034381	proteasome (prosome, macropain) subunit, alpha type, 4	chr21:31450334-31450393	NM_001034381
A_73_109429	0.0330535	0.0451668	1.99631	up		Rep: Beta-galactosidase protective protein - Homo sapiens (Human), partial (38%) [TC442962]			chr2:130086454-130086513
A_73_115770	0.0263706	0.0430154	1.66372	up	PRMT3	Bos taurus protein arginine methyltransferase 3 (PRMT3), mRNA [NM_001102076]	NM_001102076	protein arginine methyltransferase 3	chr29:24699383-24699153	NM_001102076
A_73_113786	0.0296568	0.0442879	2.02836	up		Rep: Chromosome undetermined SCAF14653, whole genome shotgun sequence - Tetraodon nigroviridis (Green puffer), partial (5%) [TC437282]			chr2:52281837-52281896
A_73_113777	0.0404745	0.0474259	2.33738	up	SLCO4C1	Bos taurus solute carrier organic anion transporter family, member 4C1 (SLCO4C1), mRNA [NM_001192846]	NM_001192846	solute carrier organic anion transporter family, member 4C1	chr7:103689333-103689274	NM_001192846
A_73_118986	0.0420776	0.0479211	2.61604	up	RIBC1	Bos taurus RIB43A domain with coiled-coils 1 (RIBC1), mRNA [NM_001075585]	NM_001075585	RIB43A domain with coiled-coils 1	chrX:96261228-96261287	NM_001075585
A_73_100871	0.0100209	0.0360893	1.81032	up					chr13:33288750-33288691
A_73_P273836	0.0144268	0.0385974	1.78119	up	GCC2	Bos taurus GRIP and coiled-coil domain containing 2 (GCC2), mRNA [NM_001192259]	NM_001192259	GRIP and coiled-coil domain containing 2	chr11:44692542-44692483	NM_001192259
A_73_117852	0.00520678	0.0313636	2.09757	up	COMMD10	Bos taurus COMM domain containing 10 (COMMD10), mRNA [NM_001083489]	NM_001083489	COMM domain containing 10	chr7:38949715-38949656	NM_001083489
A_73_P315176	0.0272028	0.0433284	2.96752	up		Rep: Nudix (Nucleoside diphosphate linked moiety X)-type motif 1 (Nudix (Nucleoside diphosphate linked moiety X)-type motif 1, isoform CRA_b) - Homo sapiens (Human), partial (93%) [TC411178]			chr25:41521724-41521665
A_73_104086	0.0308771	0.0448762	3.79399	up					chr27:34694544-34694603
A_73_P059556	0.00488371	0.0306666	2.93109	up	DEFB1	Bos taurus defensin, beta 1 (DEFB1), mRNA [NM_175703]	NM_175703	defensin, beta 1	chr27:5483475-5483416	NM_175703
A_73_113509	0.0296761	0.0442879	3.91134	up	TBC1D19	Bos taurus TBC1 domain family, member 19 (TBC1D19), mRNA [NM_001076938]	NM_001076938	TBC1 domain family, member 19	chr6:47723266-47723325	NM_001076938
A_73_120185	0.0327462	0.0451668	2.73706	up		Rep: Olfactory receptor 8, rat orthologue of mouse MOR121-1 - Rattus norvegicus (Rat), partial (98%) [TC399097]	XM_601686		chr23:28985314-28985373	XM_601686
A_73_P116221	0.0011839	0.0210219	2.18327	up	WDR52	PREDICTED: Bos taurus WD repeat domain 52 (WDR52), mRNA [XM_591373]	XM_591373	WD repeat domain 52	chr1:58469088-58469029	XM_002684775
A_73_101103	0.0313587	0.04496	2.24911	up	OR8D4	olfactory receptor, family 8, subfamily D, member 4 [Source:HGNC Symbol;Acc:14840] [ENSBTAT00000052482]	XM_589475	olfactory receptor, family 8, subfamily D, member 4	chr29:26828107-26828048	XM_589475
A_73_108169	0.0461094	0.0489114	1.89514	up	RG9MTD1	Bos taurus RNA (guanine-9-) methyltransferase domain containing 1 (RG9MTD1), nuclear gene encoding mitochondrial protein, mRNA [NM_001046323]	NM_001046323	RNA (guanine-9-) methyltransferase domain containing 1	chr1:46340321-46340262	NM_001046323
A_73_P102361	0.00228342	0.0247433	1.84976	up	TLR6	Bos taurus toll-like receptor 6 (TLR6), mRNA [NM_001001159]	NM_001001159	toll-like receptor 6	chr6:59686802-59686778	NM_001001159
A_73_117303	0.0303185	0.0445503	2.38242	up	TNRC6A	trinucleotide repeat containing 6A [Source:HGNC Symbol;Acc:11969] [ENSBTAT00000023950]	XM_614640	trinucleotide repeat containing 6A	chr25:22723464-22723523	XM_614640
A_73_112735	0.016841	0.0393442	1.51257	up	DTX3L	Bos taurus deltex 3-like (Drosophila) (DTX3L), mRNA [NM_001192396]	NM_001192396	deltex 3-like (Drosophila)	chr1:67594984-67595043	NM_001192396
A_73_P434811	0.025087	0.0426897	1.64289	up	POLK	Bos taurus polymerase (DNA directed) kappa (POLK), mRNA [NM_001102258]	NM_001102258	polymerase (DNA directed) kappa	chr10:6932447-6932506	NM_001102258
A_73_P115361	0.0170955	0.0395568	2.20964	up	FRYL	Bos taurus FRY-like (FRYL), mRNA [NM_001206589]	NM_001206589	FRY-like	chr6:68829625-68829566	NM_001206589
A_73_121355	0.0458822	0.0489114	2.11293	up		Rep: Possible 3-hydroxyacid dehydrogenase - Synechococcus sp. (strain WH7805), partial (7%) [TC419130]	XM_003582585		chr8:111914957-111914898	XM_003582585
A_73_101058	0.0151368	0.0389517	2.39497	up		oculocutaneous albinism II [Source:HGNC Symbol;Acc:8101] [ENSBTAT00000012974]	XM_001789671		chr2:347156-347097	XM_001789671
A_73_P076321	0.00227946	0.0247433	1.93604	up		Rep: Cytosolic carboxypeptidase 2 (EC 3.4.17.-) (ATP/GTP-binding protein- like 2). - Canis familiaris, partial (86%) [TC440021]	XM_001788748		chr15:78661629-78661570	XM_001788748
A_73_P165627	0.00190963	0.0236639	2.77153	up	LOC617654	PREDICTED: Bos taurus glyceraldehyde-3-phosphate dehydrogenase-like (LOC617654), miscRNA [XR_083674]	XR_083674	glyceraldehyde-3-phosphate dehydrogenase-like	chr5:42210174-42210115	XR_082761
A_73_116841	0.000634	0.0181226	1.51151	up					chr17:044593794-044593735
A_73_117635	0.00462545	0.0303141	1.82186	up	TRH	Bos taurus thyrotropin-releasing hormone (TRH), mRNA [NM_001101221]	NM_001101221	thyrotropin-releasing hormone	chr20:031474104-031474163	NM_001101221
A_73_102937	0.0315822	0.0450041	1.98379	up	RHOBTB1	Bos taurus Rho-related BTB domain containing 1 (RHOBTB1), mRNA [NM_001082453]	NM_001082453	Rho-related BTB domain containing 1	chr28:16729167-16729108	NM_001082453
A_73_P168292	0.00243181	0.0251024	5.96073	up	LOC782922	Bos taurus prostaglandin F synthetase II-like (LOC782922), mRNA [NM_001166224]	NM_001166224	prostaglandin F synthetase II-like	chr13:44064852-44064793	NM_001166224
A_73_P283456	0.0367479	0.046603	1.56471	up		Rep: ISCps6, transposase - Leeuwenhoekiella blandensis MED217, partial (8%) [TC415620]			chr17:45458005-45458064
A_73_P103936	0.0159062	0.039183	1.7726	up	ZNF165	Bos taurus zinc finger protein 165, mRNA (cDNA clone MGC:140342 IMAGE:8187388), complete cds. [BC114828]	BC114828	zinc finger protein 165	chr23:30335458-30335399
A_73_P032161	0.0132527	0.0385179	3.54029	up	SNCB	Bos taurus synuclein, beta (SNCB), mRNA [NM_001075360]	NM_001075360	synuclein, beta	chr7:39448032-39447973	NM_001075360
A_73_P074646	0.00467667	0.0303141	2.42995	up	LOC618696	Uncharacterized protein [Source:UniProtKB/TrEMBL;Acc:E1BBG5] [ENSBTAT00000057206]	XR_083836	trophoblast Kunitz domain protein 1-like	chr13:74691867-74691926	XR_082904
A_73_P408021	0.00118195	0.0210219	1.86451	up	ZNF566	Bos taurus zinc finger protein 566 (ZNF566), mRNA [NM_001077017]	NM_001077017	zinc finger protein 566	chr18:47264856-47264915	NM_001077017
A_73_P248824	0.00166777	0.0230619	4.57911	up		Rep: MGC157238 protein - Bos taurus (Bovine), partial (77%) [TC416150]			chr3:54809642-54809701
A_73_P194721	0.043308	0.048378	1.53469	up	PNRC2	Bos taurus proline-rich nuclear receptor coactivator 2 (PNRC2), mRNA [NM_001076957]	NM_001076957	proline-rich nuclear receptor coactivator 2	chr2:129539905-129538976	NM_001076957
A_73_P167292	0.00789986	0.0343955	1.60523	up	OXCT1	Bos taurus 3-oxoacid CoA transferase 1 (OXCT1), nuclear gene encoding mitochondrial protein, mRNA [NM_001076070]	NM_001076070	3-oxoacid CoA transferase 1	chr20:32728062-32728121	NM_001076070
A_73_100847	0.00167382	0.0230619	12.874	up		Uncharacterized protein [Source:UniProtKB/TrEMBL;Acc:E1BI74] [ENSBTAT00000039859]			chr15:52289888-52289947
A_73_P309631	0.0176947	0.0396674	1.75228	up	WDHD1	Bos taurus WD repeat and HMG-box DNA binding protein 1 (WDHD1), mRNA [NM_001192766]	NM_001192766	WD repeat and HMG-box DNA binding protein 1	chr10:67684694-67682580	NM_001192766
A_73_102184	0.00215796	0.0243923	1.66353	up	NEGR1	Bos taurus neuronal growth regulator 1 (NEGR1), mRNA [NM_001205414]	NM_001205414	neuronal growth regulator 1	chr3:74146771-74146830	NM_001205414
A_73_P061936	0.0347148	0.0457847	1.82572	up	FKBP5	Bos taurus FK506 binding protein 5 (FKBP5), mRNA [NM_001192862]	NM_001192862	FK506 binding protein 5	chr23:9559638-9559579	NM_001192862
A_73_115010	0.0343768	0.0457019	2.74866	up		Rep: Sensory axon guidance protein 3, isoform a - Caenorhabditis elegans, partial (4%) [TC399805]			chr10:12218069-12218010
A_73_P097906	0.0213836	0.0410334	1.7756	up		Bos taurus clone NG010005B20E04 mRNA, complete sequence. [AY563767]	AY563767		chr25:1690716-1690657
A_73_110649	0.000358	0.0178726	3.49735	up	PCDHGA4	PREDICTED: Bos taurus protocadherin gamma subfamily A, 6 (PCDHGA6), mRNA [XM_002689259]	XM_002689259	protocadherin gamma subfamily A, 4	chr7:54142844-54146911	XM_002689259
A_73_P039406	0.0304429	0.0445714	2.4636	up	KIAA1456	Bos taurus putative methyltransferase KIAA1456 homolog (KIAA1456), mRNA [NM_001076832]	NM_001076832	putative methyltransferase KIAA1456 homolog	chr27:23063385-23063326	NM_001076832
A_73_P097593	0.000917	0.0204442	2.69524	up		Bos taurus clone H33 mRNA sequence. [DQ347628]	DQ347628		chr23:031817925-031817866
A_73_P096526	0.0386865	0.0471667	1.52248	up	USP13	Bos taurus ubiquitin specific peptidase 13 (isopeptidase T-3) (USP13), mRNA [NM_001191266]	NM_001191266	ubiquitin specific peptidase 13 (isopeptidase T-3)	chr1:87951455-87951396	NM_001191266
A_73_107172	0.011124	0.0374277	1.64231	up	TSLP	BE04008B1H06 Normalized and Subtracted bovine embryonic and extraembryonic tissue Bos taurus cDNA clone BE04008B1H06 5, mRNA sequence [CN436174]	CN436174	thymic stromal lymphopoietin	chr10:87743387-87743328	XM_001787527
A_73_112283	0.020415	0.0405126	1.60884	up	FCN1	Ficolin-2 [Source:UniProtKB/Swiss-Prot;Acc:Q5I2E5] [ENSBTAT00000065623]	BC123902	ficolin (collagen/fibrinogen domain containing) 1	chr11:106831755-106831814
A_73_P488478	0.0104902	0.0366799	2.51036	up					chr17:072849461-072849402
A_73_P114171	0.0262548	0.0430154	5.59535	up	PCDH8	Bos taurus protocadherin 8 (PCDH8), mRNA [NM_001192348]	NM_001192348	protocadherin 8	chr12:10942448-10942507	NM_001192348
A_73_116284	0.024798	0.0424617	4.74017	up	XKR6	Bos taurus XK, Kell blood group complex subunit-related family, member 6 (XKR6), mRNA [NM_001192331]	NM_001192331	XK, Kell blood group complex subunit-related family, member 6	chr8:7984027-7983968	NM_001192331
A_73_P510978	0.0258878	0.0429069	1.94775	up		GB	XM_001788751		chr19:019712162-019712221	XM_001788751
A_73_P241900	0.0144623	0.0385974	4.07087	up	LOC100847361	PREDICTED: Bos taurus uncharacterized LOC100849944 (LOC100849944), mRNA [XM_003582594]	XM_003582594	uncharacterized LOC100847361	chr9:17596349-17596290	XM_003582594
A_73_P115336	0.0329568	0.0451668	2.08213	up		family with sequence similarity 184, member B [Source:HGNC Symbol;Acc:29235] [ENSBTAT00000007791]	DR114342		chr6:38617019-38614954	XM_003582318
A_73_P417261	0.0112675	0.0374277	2.06293	up	XPOT	Bos taurus exportin, tRNA (nuclear export receptor for tRNAs) (XPOT), mRNA [NM_001206076]	NM_001206076	exportin, tRNA (nuclear export receptor for tRNAs)	chr5:49550276-49550226	NM_001206076
A_73_P325841	0.00152691	0.0227477	2.48389	up	SLC35F3	Bos taurus solute carrier family 35, member F3 (SLC35F3), mRNA [NM_001192935]	NM_001192935	solute carrier family 35, member F3	chr28:7196371-7196430	NM_001192935
A_73_P098781	0.0114507	0.0374277	1.56985	up	SEPP1	Bos taurus selenoprotein P, plasma, 1 (SEPP1), mRNA [NM_174459]	NM_174459	selenoprotein P, plasma, 1	chr20:31792414-31792473	NM_174459
A_73_P352126	0.00706207	0.033759	1.91246	up	DPYD	Bos taurus dihydropyrimidine dehydrogenase (DPYD), mRNA [NM_174041]	NM_174041	dihydropyrimidine dehydrogenase	chr3:46486205-46486264	NM_174041
A_73_P278606	0.0306131	0.0447152	1.89706	up	MORC3	MORC family CW-type zinc finger 3 [Source:HGNC Symbol;Acc:23572] [ENSBTAT00000015758]	BC151785	MORC family CW-type zinc finger 3	chr1:150337975-150341440	XM_002685152
A_73_P494468	0.0130435	0.0385179	2.91783	up					chr8:022773047-022772986
A_73_P113971	0.0276855	0.0434505	2.35769	up	LAMA5	laminin, alpha 5 [Source:HGNC Symbol;Acc:6485] [ENSBTAT00000003981]	XM_002707725	laminin, alpha 5	chr13:55432761-55432820	XM_002707725
A_73_P201822	0.0192829	0.0400367	1.97351	up	REST	Bos taurus RE1-silencing transcription factor (REST), mRNA [NM_001101880]	NM_001101880	RE1-silencing transcription factor	chr6:73846921-73846980	NM_001101880
A_73_P089471	0.0183353	0.0397356	2.32733	up	LOC787500	GB	XM_002687020	olfactory receptor-like protein OLF3-like	chr4:107972175-107972234	XM_002687020
A_73_116626	0.0218664	0.0411482	1.50609	up		Rep: Zinc finger protein 75A - Homo sapiens (Human), partial (86%) [TC432305]	XM_003584009		chr25:2779948-2780007	XM_003584009
A_73_P163882	0.0189454	0.039827	1.90741	up		Rep: Succinate dehydrogenase iron-sulfur protein - Xylella fastidiosa, partial (7%) [TC469925]			chr12:31483859-31483918
A_73_P094921	0.0162288	0.039183	2.30851	up	KLF7	Bos taurus Kruppel-like factor 7 (ubiquitous) (KLF7), mRNA [NM_001192919]	NM_001192919	Kruppel-like factor 7 (ubiquitous)	chr2:95812582-95781784	NM_001192919
A_73_P330751	0.0437691	0.0484757	1.6129	up	ERO1L	Bos taurus ERO1-like (S. cerevisiae) (ERO1L), mRNA [NM_001103348]	NM_001103348	ERO1-like (S. cerevisiae)	chr10:11461599-11469361	NM_001103348
A_73_P491352	0.0439829	0.0484757	2.51581	up		Uncharacterized protein [Source:UniProtKB/TrEMBL;Acc:E1BCC4] [ENSBTAT00000016870]	BC149090		chr2:14444530-14444471	XM_002695279
A_73_116315	0.0364206	0.0465199	1.74919	up	UTP15	Bos taurus UTP15, U3 small nucleolar ribonucleoprotein, homolog (S. cerevisiae) (UTP15), mRNA [NM_001101128]	NM_001101128	UTP15, U3 small nucleolar ribonucleoprotein, homolog (S. cerevisiae)	chr20:7975937-7975878	NM_001101128
A_73_P511458	0.0237261	0.0419443	2.05909	up	RNF7	Hw_loin_58_050825_F12 Bos taurus CF-24-HW loin cDNA library Bos taurus cDNA, mRNA sequence [DV791975]	DV791975	ring finger protein 7
A_73_P338281	0.00214246	0.0243923	2.44328	up	MYO6	Bos taurus myosin VI (MYO6), mRNA [NM_001206072]	NM_001206072	myosin VI	chr9:15743740-15743799	NM_001206072
A_73_107388	0.0469306	0.0491952	1.57081	up					chrX:118111681-118111622
A_73_108734	0.0370814	0.046603	3.18389	up		PREDICTED: Bos taurus NCK-associated protein 1 (NCKAP1), mRNA [XM_003581801]	XM_003581801		chr2:13667923-13667982	XM_003581801
A_73_P166662	0.0225867	0.041365	1.51408	up	RASSF6	Ras association (RalGDS/AF-6) domain family member 6 [Source:HGNC Symbol;Acc:20796] [ENSBTAT00000015836]	XM_598333	Ras association (RalGDS/AF-6) domain family member 6	chr6:90373660-90373601	XM_002688365
A_73_103196	0.0241954	0.042085	1.61896	up	NOD1	Bos taurus nucleotide-binding oligomerization domain containing 1 (NOD1), mRNA [NM_001256563]	NM_001256563	nucleotide-binding oligomerization domain containing 1	chr4:66282092-66282151	NM_001256563
A_73_P127991	0.0231981	0.0418408	1.90206	up	KIAA0408	KIAA0408 [Source:HGNC Symbol;Acc:21636] [ENSBTAT00000005116]	XM_001789720	KIAA0408 ortholog	chr9:24127836-24127895	XM_001789720
A_73_104106	0.0192333	0.0399943	4.39973	up	GBP5	Bos taurus guanylate binding protein 5 (GBP5), mRNA [NM_001075746]	NM_001075746	guanylate binding protein 5	chr3:54269418-54269477	NM_001075746
A_73_P146706	0.00241055	0.0251024	3.0637	up		KECB27-246.g-T7 NVH bovine early embryo cDNA library KECB Bos taurus cDNA 3', mRNA sequence [DN846257]	DN846257		chr4:88354249-88354190
A_73_P049131	0.026035	0.0429809	2.30558	up	IGFBP7	Bos taurus insulin-like growth factor binding protein 7 (IGFBP7), mRNA [NM_001102300]	NM_001102300	insulin-like growth factor binding protein 7	chr6:74071221-74071162	NM_001102300
A_73_P053841	0.0074502	0.0340869	1.53589	up		TBC1 domain family, member 9 (with GRAM domain) [Source:HGNC Symbol;Acc:21710] [ENSBTAT00000029790]	DV882499		chr17:17440280-17442366	XM_002694365
A_73_105656	0.0307435	0.0447776	1.76217	up	SCD5	Bos taurus stearoyl-CoA desaturase 5 (SCD5), mRNA [NM_001076945]	NM_001076945	stearoyl-CoA desaturase 5	chr6:99233280-99233263	NM_001076945
A_73_P104091	0.0237529	0.0419443	2.09374	up		syntaxin 2 [Source:HGNC Symbol;Acc:3403] [ENSBTAT00000061491]	BC118465		chr17:47331031-47339771	XM_003583302
A_73_119822	0.0217044	0.0411136	1.67292	up	C1QTNF7	Bos taurus C1q and tumor necrosis factor related protein 7 (C1QTNF7), mRNA [NM_001076201]	NM_001076201	C1q and tumor necrosis factor related protein 7	chr6:115396206-115396265	NM_001076201
A_73_P094816	0.0399109	0.0474259	1.63984	up	SPATS2L	Bos taurus spermatogenesis associated, serine-rich 2-like (SPATS2L), mRNA [NM_001192987]	NM_001192987	spermatogenesis associated, serine-rich 2-like	chr2:89438714-89438773	NM_001192987
A_73_111658	0.00246017	0.0251183	1.96568	up		HW_Fat_4_E08 Bos taurus CF-24-HW fat cDNA library Bos taurus cDNA, mRNA sequence [DV779792]	DV779792		chr8:1266393-1266334
A_73_117763	0.0412527	0.0477332	2.0579	up		Rep: PREDICTED: sterile alpha motif domain containing 9 isoform 3 - Pan troglodytes, partial (8%) [TC448022]			chr4:10302239-10302180
A_73_117912	0.0224796	0.0413398	1.61512	up	FKBP5	Bos taurus FK506 binding protein 5 (FKBP5), mRNA [NM_001192862]	NM_001192862	FK506 binding protein 5	chr23:9521373-9521314	NM_001192862
A_73_103953	0.0340721	0.0455931	1.81821	up	LOC781710	Bos taurus cDNA clone IMAGE:8014873. [BC114020]	BC114020	uncharacterized LOC781710	chr3:054369349-054369408	XM_591946
A_73_112621	0.042542	0.0480274	1.93578	up	C13H20orf79	Bos taurus chromosome 13 open reading frame, human C20orf79 (C13H20orf79), mRNA [NM_001040507]	NM_001040507	chromosome 13 open reading frame, human C20orf79	chr13:39015759-39015818	NM_001040507
A_73_P071151	0.000836	0.0204135	1.53303	up	MN1	meningioma (disrupted in balanced translocation) 1 [Source:HGNC Symbol;Acc:7180] [ENSBTAT00000052340]	XM_001254017	meningioma (disrupted in balanced translocation) 1	chr17:69473785-69473726	XM_001254017
A_73_P295176	0.00409336	0.0297567	1.71444	up	KIF23	Bos taurus kinesin family member 23 (KIF23), mRNA [NM_001098038]	NM_001098038	kinesin family member 23	chr10:16299582-16299641	NM_001098038
A_73_P100726	0.0233571	0.0418555	1.82867	up	DEFB1	Bos taurus defensin, beta 1 (DEFB1), mRNA [NM_175703]	NM_175703	defensin, beta 1	chr27:5483472-5483413	NM_175703
A_73_110042	0.0197253	0.0402776	2.42705	up		Rep: Acid phosphatase-like protein 2 precursor - Homo sapiens (Human), partial (35%) [TC404971]	XM_003581758		chr1:128686529-128686470	XM_003581758
A_73_110338	0.043526	0.0483917	2.68266	up	VPS13B	Uncharacterized protein [Source:UniProtKB/TrEMBL;Acc:E1BIY8] [ENSBTAT00000037200]	XM_001788158	vacuolar protein sorting 13 homolog B (yeast)	chr14:67390218-67390159	XM_001788158
A_73_P078906	0.0372116	0.046603	4.2562	up	TXNDC16	Bos taurus thioredoxin domain containing 16 (TXNDC16), mRNA [NM_001205394]	NM_001205394	thioredoxin domain containing 16	chr10:11653492-11653551	NM_001205394
A_73_106603	0.0181291	0.0397356	2.07099	up					chr29:39596317-39594560
A_73_P098666	0.00589325	0.0317057	3.70831	up	BOLA-N	Bos taurus MHC class I antigen (BOLA-N), mRNA [NM_001105651]	NM_001105651	MHC class I antigen		NM_001105651
A_73_P081806	0.0328206	0.0451668	1.51391	up	SNX9	Bos taurus sorting nexin 9 (SNX9), mRNA [NM_001199026]	NM_001199026	sorting nexin 9	chr9:95948659-95950830	NM_001199026
A_73_P412431	0.00144797	0.0225707	3.47275	up	KATNAL2	Bos taurus katanin p60 subunit A-like 2 (KATNAL2), mRNA [NM_001205788]	NM_001205788	katanin p60 subunit A-like 2	chr24:47203174-47203442	NM_001205788
A_73_116354	0.00750038	0.0341108	2.42598	up	LAMP5	Bos taurus lysosomal-associated membrane protein family, member 5 (LAMP5), mRNA [NM_001083418]	NM_001083418	lysosomal-associated membrane protein family, member 5	chr13:2460958-2461017	NM_001083418
A_73_113566	0.0462411	0.048938	2.17145	up	ATP2B2	Bos taurus ATPase, Ca++ transporting, plasma membrane 2 (ATP2B2), mRNA [NM_001191245]	NM_001191245	ATPase, Ca++ transporting, plasma membrane 2	chr22:54998247-54998188	NM_001191245
A_73_118346	0.0459295	0.0489114	2.26911	up		Rep: Pulmonary surfactant-associated protein B - Ovis aries (Sheep), partial (34%) [TC436917]	XM_002692364		chr13:48083153-48083094	XM_002692364
A_73_118587	0.00243402	0.0251024	8.95267	up	PEX5	Peroxisomal targeting signal 1 receptor [Source:UniProtKB/Swiss-Prot;Acc:Q1RMV0] [ENSBTAT00000052144]	BT029859	peroxisomal biogenesis factor 5	chr5:103530602-103530546
A_73_P302951	0.0313119	0.04496	1.88259	up	CUBN	Bos taurus cubilin (intrinsic factor-cobalamin receptor) (CUBN), mRNA [NM_001192575]	NM_001192575	cubilin (intrinsic factor-cobalamin receptor)	chr13:31560162-31560103	NM_001192575
A_73_P088458	0.0175414	0.0396658	1.60445	up	PMPCB	Bos taurus peptidase (mitochondrial processing) beta (PMPCB), nuclear gene encoding mitochondrial protein, mRNA [NM_001034613]	NM_001034613	peptidase (mitochondrial processing) beta	chr4:44769302-44769361	NM_001034613
A_73_P317261	0.0299103	0.0443764	1.57701	up	TIPARP	Bos taurus TCDD-inducible poly(ADP-ribose) polymerase (TIPARP), mRNA [NM_001206048]	NM_001206048	TCDD-inducible poly(ADP-ribose) polymerase	chr1:111831385-111831326	NM_001206048
A_73_P168757	0.0288584	0.0439424	2.05288	up	CYB5A	Bos taurus cytochrome b5 type A (microsomal) (CYB5A), mRNA [NM_174033]	NM_174033	cytochrome b5 type A (microsomal)	chr24:4437473-4437532	NM_174033
A_73_113587	0.00532556	0.0314574	2.25054	up	TMCC2	Bos taurus transmembrane and coiled-coil domain family 2 (TMCC2), mRNA [NM_001077135]	NM_001077135	transmembrane and coiled-coil domain family 2	chr16:2875172-2875231	NM_001077135
A_73_P338816	0.0334528	0.0453773	1.58438	up	RMND5A	Bos taurus required for meiotic nuclear division 5 homolog A (S. cerevisiae) (RMND5A), mRNA [NM_001205832]	NM_001205832	required for meiotic nuclear division 5 homolog A (S. cerevisiae)	chr11:48010526-48010467	NM_001205832
A_73_P111231	0.0283999	0.0435953	3.86987	up		KLRC1 protein [Source:UniProtKB/TrEMBL;Acc:A8E4Q0] [ENSBTAT00000031648]	BC151470		chr5:99823449-99823390	XM_003586122
A_73_P127781	0.0483692	0.0495833	1.99999	up	TNFSF10	Uncharacterized protein [Source:UniProtKB/TrEMBL;Acc:E1BE56] [ENSBTAT00000025281]	XM_583785	tumor necrosis factor (ligand) superfamily, member 10	chr1:95767710-95767769	XM_003581727
A_73_102234	0.0129314	0.0384365	1.53765	up	FGF18	Bos taurus fibroblast growth factor 18 (FGF18), mRNA [NM_001076007]	NM_001076007	fibroblast growth factor 18	chr20:3194949-3195008	NM_001076007
A_73_P344866	0.0477062	0.0494527	6.71011	up	STK38L	Bos taurus serine/threonine kinase 38 like (STK38L), mRNA [NM_001101092]	NM_001101092	serine/threonine kinase 38 like	chr5:82973899-82973840	NM_001101092
A_73_P031151	0.0425688	0.0480274	2.06542	up	FBXO18	Bos taurus F-box protein, helicase, 18 (FBXO18), mRNA [NM_001099063]	NM_001099063	F-box protein, helicase, 18	chr13:17651458-17651399	NM_001099063
A_73_114708	0.0262319	0.0430154	2.16153	up	XK	X-linked Kx blood group (McLeod syndrome) [Source:HGNC Symbol;Acc:12811] [ENSBTAT00000016904]	XM_588399	X-linked Kx blood group (McLeod syndrome)	chrX:111157663-111157604	XM_588399
A_73_101063	0.0114811	0.0374277	1.63704	up	F13A1	Bos taurus coagulation factor XIII, A1 polypeptide (F13A1), mRNA [NM_001167894]	NM_001167894	coagulation factor XIII, A1 polypeptide	chr23:48681614-48681673	NM_001167894
A_73_P251796	0.0474313	0.0494409	1.55001	up	UBXN8	Bos taurus UBX domain protein 8 (UBXN8), mRNA [NM_001038672]	NM_001038672	UBX domain protein 8	chr27:26026099-26026158	NM_001038672
A_73_109589	0.0139004	0.0385974	1.5756	up	NUDT7	Bos taurus nudix (nucleoside diphosphate linked moiety X)-type motif 7 (NUDT7), mRNA [NM_001109788]	NM_001109788	nudix (nucleoside diphosphate linked moiety X)-type motif 7	chr18:4999420-4999479	NM_001109788
A_73_100049	0.0277592	0.0434505	2.0286	up	EIF2S3Y	Eif2s3y [Source:UniProtKB/TrEMBL;Acc:C0KTL0] [ENSBTAT00000063725]	FJ627276	eukaryotic translation initiation factor 2, subunit 3, structural gene Y-linked	chrX:144232049-144231899	XM_002700462
A_73_P104651	0.00888427	0.0351263	1.7419	up	C9H6orf70	Bos taurus chromosome 6 open reading frame 70 ortholog, mRNA (cDNA clone IMAGE:8304225), complete cds. [BC133635]	BC133635	chromosome 9 open reading frame, human C6orf70	chr9:105133190-105133249
A_73_111593	0.0466261	0.0490018	4.55471	up	FAM185A	family with sequence similarity 185, member A [Source:HGNC Symbol;Acc:22412] [ENSBTAT00000019809]	EE344713	family with sequence similarity 185, member A	chr4:44348799-44370481	XM_610501
A_73_118810	0.00568081	0.0315179	2.64463	up		Rep: CCNT1 protein - Bos taurus (Bovine), partial (18%) [TC444439]			chr12:30398724-30398783
A_73_P085906	0.0336491	0.0454507	1.58056	up	TOPORS	Bos taurus topoisomerase I binding, arginine/serine-rich, E3 ubiquitin protein ligase (TOPORS), mRNA [NM_001192578]	NM_001192578	topoisomerase I binding, arginine/serine-rich, E3 ubiquitin protein ligase	chr8:11399910-11399969	NM_001192578
A_73_P101146	0.00442434	0.030164	2.79234	up	VL1X	Bos taurus immunoglobin light chain VJ region mRNA, partial cds. [AF109697]	AF109697	immunoglobin light chain VJ region
A_73_P054346	0.00490195	0.0306666	2.78198	up	DEFB1	Bos taurus defensin, beta 1 (DEFB1), mRNA [NM_175703]	NM_175703	defensin, beta 1	chr27:5483468-5483409	NM_175703
A_73_P330281	0.0212197	0.0410334	2.37029	up	XRN1	Bos taurus 5'-3' exoribonuclease 1 (XRN1), mRNA [NM_001206035]	NM_001206035	5'-3' exoribonuclease 1	chr1:127607527-127607586	NM_001206035
A_73_P091362	0.0113711	0.0374277	5.32243	up	KLRC1	Bos taurus NKG2A (NKG2A) mRNA, NKG2A-05 allele, complete cds. [EF081286]	EF081286	killer cell lectin-like receptor subfamily C, member 1	chr5:99682157-99682098	XM_003582266
A_73_P032156	0.00484232	0.0306666	1.80855	up	RG9MTD3	Bos taurus RNA (guanine-9-) methyltransferase domain containing 3 (RG9MTD3), mRNA [NM_001076859]	NM_001076859	RNA (guanine-9-) methyltransferase domain containing 3	chr8:62339498-62339557	NM_001076859
A_73_109821	0.0364253	0.0465199	2.44304	up		Rep: MGC166395 protein - Bos taurus (Bovine), partial (24%) [TC445659]			chr3:94128149-94128090
A_73_P055261	0.0313224	0.04496	1.50681	up		leukocyte immunoglobulin-like receptor, subfamily A (with TM domain), member 4 [Source:RefSeq peptide;Acc:NP_001095827] [ENSBTAT00000025766]	XM_001251735		chr18:63206614-63206673	XM_003587343
A_73_P265401	0.0388051	0.0471667	2.06017	up		WD repeat and FYVE domain containing 3 [Source:HGNC Symbol;Acc:20751] [ENSBTAT00000061443]	XM_617252		chr6:101309043-101308984	XM_617252
A_73_113632	3.12e-05	0.00708497	2.7946	up	ANKHD1	LB03087.CR_A13 GC_BGC-30 Bos taurus cDNA clone IMAGE:8517207, mRNA sequence [EE387616]	EE387616	ankyrin repeat and KH domain containing 1	chr7:53391422-53391481
A_73_P129911	0.0441245	0.0485081	2.61329	up		Rep: Transmembrane and TPR repeat-containing protein 2 - Homo sapiens (Human), partial (22%) [TC398172]	XM_002687180		chr5:12714296-12714355	XM_002687180
A_73_P467413	0.0177167	0.0396684	3.22729	up	GLB1L	Bos taurus galactosidase, beta 1-like (GLB1L), mRNA [NM_001206002]	NM_001206002	galactosidase, beta 1-like	chr2:107910319-107910161	NM_001206002
A_73_P276671	0.00889242	0.0351263	1.50269	up	CTCF	Bos taurus CCCTC-binding factor (zinc finger protein) (CTCF), mRNA [NM_001075748]	NM_001075748	CCCTC-binding factor (zinc finger protein)	chr18:35270823-35270882	NM_001075748
A_73_121036	0.00352297	0.0286611	3.67046	up	FCAR	Bos taurus Fc fragment of IgA, receptor for (FCAR), mRNA [NM_001012685]	NM_001012685	Fc fragment of IgA, receptor for	chr18:62845828-62848824	NM_001012685
A_73_P263706	0.00839059	0.0348469	1.72741	up	AAED1	Bos taurus AhpC/TSA antioxidant enzyme domain containing 1 (AAED1), mRNA [NM_001076436]	NM_001076436	AhpC/TSA antioxidant enzyme domain containing 1	chr8:84801963-84801904	NM_001076436
A_73_P512568	0.0192314	0.0399943	1.86345	up	IGLL1	immunoglobulin lambda-like polypeptide 1 [Source:RefSeq peptide;Acc:NP_001077269] [ENSBTAT00000031209]	AF023842	immunoglobulin lambda-like polypeptide 1	chr17:72969657-72969716
A_73_P205677	0.044099	0.0485081	1.67165	up	PIK3C3	Bos taurus phosphatidylinositol 3-kinase, catalytic subunit type 3 (PIK3C3), mRNA [NM_001099067]	NM_001099067	phosphatidylinositol 3-kinase, catalytic subunit type 3	chr24:14251535-14249987	NM_001099067
A_73_114248	0.000537	0.0181226	2.0057	up	NEXN	nexilin (F actin binding protein) [Source:HGNC Symbol;Acc:29557] [ENSBTAT00000039125]	XM_003581997	nexilin-like	chr3:66999003-66998944	XM_003581997
A_73_P038731	0.0198804	0.0402776	2.31884	up	TGFB2	Bos taurus transforming growth factor, beta 2 (TGFB2), mRNA [NM_001113252]	NM_001113252	transforming growth factor, beta 2	chr16:22587569-22587628	NM_001113252
A_73_P051206	0.00436063	0.0301621	3.8276	up	JAKMIP2	Bos taurus janus kinase and microtubule interacting protein 2 (JAKMIP2), mRNA [NM_001075897]	NM_001075897	janus kinase and microtubule interacting protein 2	chr7:60809133-60809074	NM_001075897
A_73_P041741	0.0137948	0.0385974	4.1271	up	HSD17B3	Bos taurus hydroxysteroid (17-beta) dehydrogenase 3 (HSD17B3), mRNA [NM_001076439]	NM_001076439	hydroxysteroid (17-beta) dehydrogenase 3	chr8:84382569-84382510	NM_001076439
A_73_105462	0.000749	0.0193598	2.36908	up	NELL2	Bos taurus NEL-like 2 (chicken) (NELL2), mRNA [NM_001102084]	NM_001102084	NEL-like 2 (chicken)	chr5:36042000-36042059	NM_001102084
A_73_102336	0.0312831	0.04496	1.88387	up	NKX2-3	Bos taurus NK2 homeobox 3 (NKX2-3), mRNA [NM_001034676]	NM_001034676	NK2 homeobox 3	chr26:20400705-20402246	NM_001034676
A_73_P386451	0.0409626	0.0476613	1.51487	up	C15H11orf57	Bos taurus chromosome 15 open reading frame, human C11orf57 (C15H11orf57), mRNA [NM_001083423]	NM_001083423	chromosome 15 open reading frame, human C11orf57	chr15:22716125-22716184	NM_001083423
A_73_P068292	0.0440364	0.0484757	2.3276	up		PREDICTED: Bos taurus zinc finger protein 160-like (LOC100139984), partial miscRNA [XR_083449]	XR_083449		chr18:59917123-59917182	XM_002695305
A_73_109891	0.00354332	0.0286611	2.54866	up	TAC3	Bos taurus tachykinin 3 (TAC3), mRNA [NM_181017]	NM_181017	tachykinin 3	chr5:56747233-56747783	NM_181017
A_73_108857	0.0180327	0.0397356	1.92301	up		Rep: PP10897 - Homo sapiens (Human), partial (10%) [TC444150]			chr23:44657169-44657110
A_73_P076116	0.0302382	0.04455	1.80006	up	B3GNT6	Bos taurus UDP-GlcNAc:betaGal beta-1,3-N-acetylglucosaminyltransferase 6 (core 3 synthase) (B3GNT6), mRNA [NM_001103307]	NM_001103307	UDP-GlcNAc:betaGal beta-1,3-N-acetylglucosaminyltransferase 6 (core 3 synthase)	chr15:057237383-057237442	NM_001103307
A_73_P079846	0.0397514	0.0474259	1.50191	up	SNAP23	Bos taurus synaptosomal-associated protein, 23kDa (SNAP23), mRNA [NM_001075831]	NM_001075831	synaptosomal-associated protein, 23kDa	chr10:37983965-37984024	NM_001075831
A_73_119710	0.00546761	0.0314574	1.60932	up		Rep: Nucleolar protein 11 - Bos taurus (Bovine), partial (11%) [TC442653]			chr19:49795112-49795053
A_73_P030621	0.0193535	0.0401217	1.58904	up	ACOX1	Bos taurus acyl-CoA oxidase 1, palmitoyl (ACOX1), mRNA [NM_001035289]	NM_001035289	acyl-CoA oxidase 1, palmitoyl	chr19:56320338-56321253	NM_001035289
A_73_P069036	0.000834	0.0204135	6.13019	up		Rep: SH3-containing GRB2-like protein 3 (Endophilin-3) (Endophilin-A3) (SH3 domain protein 2C) (EEN-B2). - Canis familiaris, partial (89%) [TC418312]	XM_002696595		chr21:24978568-24978509	XM_002696595
A_73_114083	0.0397264	0.0474259	1.52979	up		remodeling and spacing factor 1 [Source:HGNC Symbol;Acc:18118] [ENSBTAT00000061202]	XM_864539		chr29:18422736-18422795	XM_864539
A_73_118963	0.0285001	0.0436074	1.66444	up	TRDMT1	Bos taurus tRNA aspartic acid methyltransferase 1 (TRDMT1), mRNA [NM_181812]	NM_181812	tRNA aspartic acid methyltransferase 1	chr13:31865293-31863482	NM_181812
A_73_P071836	0.0478661	0.04949	1.85594	up	KMO	Bos taurus kynurenine 3-monooxygenase (kynurenine 3-hydroxylase) (KMO), mRNA [NM_001243298]	NM_001243298	kynurenine 3-monooxygenase (kynurenine 3-hydroxylase)	chr16:35974616-35974557	NM_001243298
A_73_P097631	0.00972267	0.0357895	1.67453	up	TSPAN32	Bos taurus tetraspanin 32 (TSPAN32), mRNA [NM_001242955]	NM_001242955	tetraspanin 32	chr29:49877488-49877429	NM_001242955
A_73_114330	0.0245508	0.0423419	1.5924	up	HSD17B12	Bos taurus hydroxysteroid (17-beta) dehydrogenase 12 (HSD17B12), mRNA [NM_001101307]	NM_001101307	hydroxysteroid (17-beta) dehydrogenase 12	chr15:74830611-74830670	NM_001101307
A_73_P311751	0.0146232	0.0385974	1.58138	up	NAPB	Bos taurus N-ethylmaleimide-sensitive factor attachment protein, beta (NAPB), mRNA [NM_001046233]	NM_001046233	N-ethylmaleimide-sensitive factor attachment protein, beta	chr13:42417210-42417154	NM_001046233
A_73_102921	0.00162986	0.0230619	2.17554	up	CRISPLD2	Bos taurus cysteine-rich secretory protein LCCL domain containing 2 (CRISPLD2), mRNA [NM_001100299]	NM_001100299	cysteine-rich secretory protein LCCL domain containing 2	chr18:11050831-11050890	NM_001100299
A_73_P253481	2.12e-05	0.00618043	2.1021	up	KRT75	Bos taurus keratin 75 (KRT75), mRNA [NM_001076917]	NM_001076917	keratin 75	chr5:27632863-27633271	NM_001076917
A_73_P085656	0.037705	0.0467478	2.51537	up	POLR3G	Bos taurus polymerase (RNA) III (DNA directed) polypeptide G (32kD) (POLR3G), mRNA [NM_001206143]	NM_001206143	polymerase (RNA) III (DNA directed) polypeptide G (32kD)	chr7:92413818-92416936	NM_001206143
A_73_P492893	0.0167922	0.0393442	2.30485	up	LOC100849682	PREDICTED: Bos taurus major allergen I polypeptide chain 1-like (LOC100849682), mRNA [XM_003585404]	XM_003585404	major allergen I polypeptide chain 1-like	chr18:45411505-45411446	XM_003585404
A_73_106930	0.0261773	0.0430154	3.23858	up	SRPX	Bos taurus sushi-repeat containing protein, X-linked (SRPX), mRNA [NM_001040489]	NM_001040489	sushi-repeat containing protein, X-linked	chrX:110672884-110672943	NM_001040489
A_73_115892	0.00207087	0.0243923	6.27379	up	FRZB	Bos taurus frizzled-related protein (FRZB), mRNA [NM_174059]	NM_174059	frizzled-related protein	chr2:13761700-13761759	NM_174059
A_73_P203407	0.00275335	0.0265204	2.52989	up	CRYZ	Bos taurus crystallin, zeta (quinone reductase) (CRYZ), mRNA [NM_174025]	NM_174025	crystallin, zeta (quinone reductase)	chr3:70273895-70274369	NM_174025
A_73_P070711	0.0148443	0.0386711	2.22936	up		syntaxin 2 [Source:HGNC Symbol;Acc:3403] [ENSBTAT00000061491]	XM_002694458		chr17:47349310-47349369	XM_002694458
A_73_106583	0.0387812	0.0471667	4.14721	up					chr4:86574386-86574445
A_73_120734	0.00155959	0.0227477	1.74059	up		spectrin repeat containing, nuclear envelope 1 [Source:HGNC Symbol;Acc:17089] [ENSBTAT00000012328]	BC149857		chr9:90276859-90276800	XM_001787739
A_73_P420236	0.0205784	0.0406536	1.86208	up	HPS5	Bos taurus Hermansky-Pudlak syndrome 5 (HPS5), mRNA [NM_001206136]	NM_001206136	Hermansky-Pudlak syndrome 5	chr29:26633801-26633860	NM_001206136
A_73_105448	0.000253	0.0174316	4.64454	up					chr3:060449072-060449131
A_73_P088821	0.0323115	0.0451668	1.52552	up	GLI3	GLI family zinc finger 3 [Source:HGNC Symbol;Acc:4319] [ENSBTAT00000033607]	XM_001253425	GLI family zinc finger 3	chr4:79758063-79758122	XM_002686896
A_73_118860	0.00336149	0.0283643	1.71801	up	ENDOD1	Bos taurus endonuclease domain containing 1 (ENDOD1), mRNA [NM_001102519]	NM_001102519	endonuclease domain containing 1	chr15:15585111-15585052	NM_001102519
A_73_P086316	0.0166189	0.0391868	2.72277	up	TRPM6	transient receptor potential cation channel, subfamily M, member 6 [Source:HGNC Symbol;Acc:17995] [ENSBTAT00000046932]	XM_002689663	transient receptor potential cation channel, subfamily M, member 6	chr8:51120200-51120141	XM_002689663
A_73_115935	0.0343772	0.0457019	2.02814	up		LB01615.CR_K23 GC_BGC-16 Bos taurus cDNA clone IMAGE:8083441, mRNA sequence [DT811585]	DT811585		chr5:49809105-49809046
A_73_P289951	0.0401102	0.0474259	1.76363	up	KTN1	Bos taurus kinectin 1 (kinesin receptor) (KTN1), mRNA [NM_001102205]	NM_001102205	kinectin 1 (kinesin receptor)	chr10:68302877-68302936	NM_001102205
A_73_116038	0.0294561	0.0442064	1.91015	up	HCFC2	Bos taurus host cell factor C2 (HCFC2), mRNA [NM_001192948]	NM_001192948	host cell factor C2	chr5:68096792-68096851	NM_001192948
A_73_P296031	0.0406273	0.047441	1.70047	up	DNM1L	Bos taurus dynamin 1-like (DNM1L), mRNA [NM_001046494]	NM_001046494	dynamin 1-like	chr5:77514972-77514913	NM_001046494
A_73_P082411	0.000593	0.0181226	1.58451	up	RHOQ	Bos taurus ras homolog gene family, member Q (RHOQ), mRNA [NM_001205498]	NM_001205498	ras homolog gene family, member Q	chr11:28871670-28871729	NM_001205498
A_73_P148506	0.0275642	0.0434505	1.78792	up		1254545 MARC 7BOV Bos taurus cDNA 5', mRNA sequence [DN516109]	DN516109		chr16:857653-857594
A_73_P068161	0.0170807	0.0395568	1.81338	up		Uncharacterized protein [Source:UniProtKB/TrEMBL;Acc:E1B6Z4] [ENSBTAT00000026429]			chr18:57971486-57971427
A_73_106526	0.039003	0.0473183	2.45702	up	CCDC150	Bos taurus hypothetical LOC509158, mRNA (cDNA clone MGC:155322 IMAGE:8509914), complete cds. [BC126763]	BC126763	coiled-coil domain containing 150	chr2:85726519-85726578	XM_001787516
A_73_P132176	0.0269064	0.0432298	7.9346	up		967152 MARC 3BOV Bos taurus cDNA 3', mRNA sequence [CK776010]	CK776010		chr21:35207729-35207788
A_73_107313	0.00772545	0.0343292	7.26641	up		Rep: Protocadherin gamma A9 precursor - Pan troglodytes (Chimpanzee), partial (23%) [TC480896]			chr7:54169546-54169605
A_73_111008	0.00941108	0.0353204	1.52543	up		LB0172.CR_P04 GC_BGC-17 Bos taurus cDNA clone IMAGE:8121558, mRNA sequence [DT807874]	DT807874		chr10:5551842-5551783
A_73_P110856	0.0351783	0.0460676	2.1062	up	NR3C1	Bos taurus nuclear receptor subfamily 3, group C, member 1 (glucocorticoid receptor) (NR3C1), mRNA [NM_001206634]	NM_001206634	nuclear receptor subfamily 3, group C, member 1 (glucocorticoid receptor)	chr7:56236052-56235993	NM_001206634
A_73_P361996	0.00383641	0.0291957	2.32695	up	SDAD1	Bos taurus SDA1 domain containing 1 (SDAD1), mRNA [NM_001102489]	NM_001102489	SDA1 domain containing 1	chr6:92559262-92559203	NM_001102489
A_73_P407891	0.00659816	0.0328978	2.03472	up	ENDOD1	Bos taurus endonuclease domain containing 1 (ENDOD1), mRNA [NM_001102519]	NM_001102519	endonuclease domain containing 1	chr15:15588422-15588363	NM_001102519
A_73_118330	0.0397457	0.0474259	2.0883	up	ALPK2	Bos taurus alpha-kinase 2 (ALPK2), mRNA [NM_001192248]	NM_001192248	alpha-kinase 2	chr24:58145746-58139236	NM_001192248
A_73_P267316	0.0121625	0.0377945	4.49448	up	LOC407148	Bos taurus ADP-ribosyltransferase 5-like (LOC407148), mRNA [NM_001104964]	NM_001104964	ADP-ribosyltransferase 5-like	chr15:52270586-52270645	NM_001104964
A_73_115929	0.00290753	0.0272148	1.52283	up	AMT	Bos taurus aminomethyltransferase (AMT), nuclear gene encoding mitochondrial protein, mRNA [NM_177485]	NM_177485	aminomethyltransferase	chr22:51257702-51257643	NM_177485
A_73_P276416	0.0452809	0.0486251	1.65416	up	PEX11A	Bos taurus peroxisomal biogenesis factor 11 alpha (PEX11A), mRNA [NM_001075721]	NM_001075721	peroxisomal biogenesis factor 11 alpha	chr21:21525184-21525125	NM_001075721
A_73_P290636	0.0172268	0.0395568	1.55181	up		LB01944.CR_I15 GC_BGC-19 Bos taurus cDNA clone IMAGE:8576537 5', mRNA sequence [EW681554]	EW681554		chr6:101289643-101289583	XM_617252
A_73_112419	0.0417662	0.0479211	1.50551	up	ANO10	Bos taurus anoctamin 10 (ANO10), mRNA [NM_001102169]	NM_001102169	anoctamin 10	chr22:15990741-15935054	NM_001102169
A_73_P077421	0.0183881	0.0397356	1.86684	up	ABCC4	PREDICTED: Bos taurus ATP-binding cassette, sub-family C (CFTR [XM_593336]	XM_593336	ATP-binding cassette, sub-family C (CFTR/MRP), member 4	chr12:70031225-70031166	XM_002691921
A_73_118964	0.0227777	0.0415352	1.9222	up	SYT5	Bos taurus synaptotagmin V (SYT5), mRNA [NM_001083744]	NM_001083744	synaptotagmin V	chr18:62707385-62707444	NM_001083744
A_73_P419056	0.0136475	0.0385974	3.87336	up	PCDHGB4	Bos taurus protocadherin gamma subfamily B, 4 (PCDHGB4), mRNA [NM_001102513]	NM_001102513	protocadherin gamma subfamily B, 4	chr7:54275032-54279973	NM_001102513
A_73_P091586	0.0153604	0.0390737	4.1341	up	VWF	Bos taurus von Willebrand factor (VWF), mRNA [NM_001205308]	NM_001205308	von Willebrand factor	chr5:104688928-104688987	NM_001205308
A_73_P259246	0.0218599	0.0411482	1.84858	up	DBF4	Bos taurus DBF4 homolog (S. cerevisiae) (DBF4), mRNA [NM_001075476]	NM_001075476	DBF4 homolog (S. cerevisiae)	chr4:32440637-32438119	NM_001075476
A_73_P030811	0.0449489	0.0486251	2.00658	up	GPR56	Bos taurus G protein-coupled receptor 56 (GPR56), mRNA [NM_001083656]	NM_001083656	G protein-coupled receptor 56	chr18:025723432-025723491	NM_001083656
A_73_107726	0.0144663	0.0385974	1.64097	up	LOC522540	PREDICTED: Bos taurus myeloid-associated differentiation marker-like (LOC522540), mRNA [XM_600825]	XM_600825	myeloid-associated differentiation marker-like	chr21:20354463-20354404	XM_002696546
A_73_P034831	0.0118225	0.0377945	2.23204	up	SEMA3C	Bos taurus sema domain, immunoglobulin domain (Ig), short basic domain, secreted, (semaphorin) 3C (SEMA3C), mRNA [NM_001101082]	NM_001101082	sema domain, immunoglobulin domain (Ig), short basic domain, secreted, (semaphorin) 3C	chr4:40345529-40345588	NM_001101082
A_73_P356351	0.047627	0.0494527	1.64143	up	RG9MTD3	Bos taurus RNA (guanine-9-) methyltransferase domain containing 3 (RG9MTD3), mRNA [NM_001076859]	NM_001076859	RNA (guanine-9-) methyltransferase domain containing 3	chr8:62334017-62334076	NM_001076859
A_73_100244	0.0114882	0.0374277	1.85749	up		Rep: MGC142963 protein - Bos taurus (Bovine), complete [TC410092]			chr10:58325231-58325290
A_73_P034566	0.0447627	0.0486199	1.75043	up	LILRA4	Bos taurus leukocyte immunoglobulin-like receptor, subfamily A (with TM domain), member 4 (LILRA4), mRNA [NM_001102357]	NM_001102357	leukocyte immunoglobulin-like receptor, subfamily A (with TM domain), member 4	chrUn_GJ059960:000011798-000011857	NM_001102357
A_73_P083356	0.0147047	0.0385974	2.0612	up	FNBP1	Bos taurus formin binding protein 1 (FNBP1), mRNA [NM_001206712]	NM_001206712	formin binding protein 1	chr11:100293191-100289321	NM_001206712
A_73_P034801	0.0251411	0.0427077	1.67323	up	SSX2IP	Bos taurus synovial sarcoma, X breakpoint 2 interacting protein (SSX2IP), mRNA [NM_001076036]	NM_001076036	synovial sarcoma, X breakpoint 2 interacting protein	chr3:59648417-59648476	NM_001076036
A_73_P068351	0.0380169	0.0467603	1.77429	up	LOC100849279	PREDICTED: Bos taurus zinc finger protein 91-like (LOC100849279), mRNA [XM_003583492]	XM_003583492	zinc finger protein 91-like	chr18:060866181-060866122	XM_003583492
A_73_120566	0.0335526	0.0454339	8.32532	up	GZMH	Rep: Granzyme H precursor - Homo sapiens (Human), partial (54%) [TC446621]	XM_869546	granzyme H (cathepsin G-like 2, protein h-CCPX)	chr21:35206596-35206158	XM_869546
A_73_P451301	0.00425766	0.0301621	3.0059	up	FRY	Bos taurus furry homolog (Drosophila) (FRY), mRNA [NM_001205616]	NM_001205616	furry homolog (Drosophila)	chr12:28801839-28801780	NM_001205616
A_73_119667	0.0398012	0.0474259	1.6183	up	LOC521269	Uncharacterized protein [Source:UniProtKB/TrEMBL;Acc:F1MFB3] [ENSBTAT00000017264]	XM_003582771	uncharacterized LOC521269	chr11:21132014-21132073	XM_003582771
A_73_P295461	0.0339535	0.0455931	2.06732	up	PPIG	Bos taurus peptidylprolyl isomerase G (cyclophilin G) (PPIG), mRNA [NM_001109807]	NM_001109807	peptidylprolyl isomerase G (cyclophilin G)	chr2:26709591-26701021	NM_001109807
A_73_116534	0.0121499	0.0377945	2.84353	up	ZNF175	zinc finger protein 175 [Source:HGNC Symbol;Acc:12964] [ENSBTAT00000052898]	DV909586	zinc finger protein 175	chr18:57910669-57910728	XM_002695231
A_73_P032436	0.0435538	0.0483917	1.93551	up	ADM	Bos taurus adrenomedullin (ADM), mRNA [NM_173888]	NM_173888	adrenomedullin	chr15:42911144-42911085	NM_173888
A_73_104150	0.0129264	0.0384365	3.81187	up	IDO2	PREDICTED: Bos taurus indoleamine 2,3-dioxygenase 2-like (IDO2), miscRNA [XR_084098]	XR_084098	indoleamine 2,3-dioxygenase 2-like	chr27:34774739-34774798	XR_083196
A_73_P042726	0.0309884	0.04496	1.65519	up	MAOA	Bos taurus monoamine oxidase A (MAOA), nuclear gene encoding mitochondrial protein, mRNA [NM_181014]	NM_181014	monoamine oxidase A	chrX:105380415-105380356	NM_181014
A_73_P166102	0.0425515	0.0480274	1.50947	up	CBL	Cbl proto-oncogene, E3 ubiquitin protein ligase [Source:HGNC Symbol;Acc:1541] [ENSBTAT00000008961]	DV777788	Cas-Br-M (murine) ecotropic retroviral transforming sequence	chr15:30393689-30393748	XM_002693082
A_73_P114541	0.0273766	0.0434343	1.68552	up		myosin VA (heavy chain 12, myoxin) [Source:HGNC Symbol;Acc:7602] [ENSBTAT00000008516]	XM_615219		chr10:58152504-58152563	XM_002690962
A_73_106225	0.0477993	0.0494668	1.51049	up					chr9:089612892-089612951
A_73_109871	0.0442402	0.0485429	1.68771	up					chr7:5799619-5799678
A_73_104690	0.00816829	0.0346051	1.93809	up	FCGR3A	Bos taurus Fc fragment of IgG, low affinity IIIa, receptor (CD16a) (FCGR3A), transcript variant 1, mRNA [NM_001077402]	NM_001077402	Fc fragment of IgG, low affinity IIIa, receptor (CD16a)	chr3:8005119-8005178	NM_001077402
A_73_100345	0.0306448	0.0447295	7.59189	up	ADAMDEC1	Bos taurus ADAM-like, decysin 1 (ADAMDEC1), mRNA [NM_001206371]	NM_001206371	ADAM-like, decysin 1	chr8:72523434-72523493	NM_001206371
A_73_P086081	0.000623	0.0181226	2.38968	up	CNTLN	Bos taurus centlein, centrosomal protein (CNTLN), mRNA [NM_001192721]	NM_001192721	centlein, centrosomal protein	chr8:26953633-26939492	NM_001192721
A_73_118967	0.0481898	0.0495833	1.94458	up		Rep: Chromosome undetermined scaffold_22, whole genome shotgun sequence - Paramecium tetraurelia, partial (8%) [TC401583]			chr3:25476134-25476193
A_73_P060031	0.0353907	0.0460676	1.56062	up	IFIT2	interferon-induced protein with tetratricopeptide repeats 2 [Source:HGNC Symbol;Acc:5409] [ENSBTAT00000049389]	BT025389	interferon-induced protein with tetratricopeptide repeats 2	chr26:11071063-11071122	XM_001787823
A_73_P114516	0.0306892	0.0447498	3.49063	up	EPB42	Bos taurus erythrocyte membrane protein band 4.2 (EPB42), mRNA [NM_174312]	NM_174312	erythrocyte membrane protein band 4.2	chr10:38519762-38519703	NM_174312
A_73_P344236	0.0394794	0.0474259	1.85707	up	C21H14orf129	Bos taurus chromosome 21 open reading frame, human C14orf129 (C21H14orf129), mRNA [NM_001078056]	NM_001078056	chromosome 21 open reading frame, human C14orf129	chr21:62885896-62885955	NM_001078056
A_73_P058211	0.0178589	0.0397356	2.5841	up		Sperm protamine P1 [Source:UniProtKB/Swiss-Prot;Acc:P02318] [ENSBTAT00000046692]	M14559		chr25:9998917-9998858	XM_002703065
A_73_P331661	0.0317053	0.0450857	1.67968	up	TUBD1	Bos taurus tubulin, delta 1 (TUBD1), mRNA [NM_001075470]	NM_001075470	tubulin, delta 1	chr19:11064615-11064556	NM_001075470
A_73_117043	0.031287	0.04496	1.90319	up		Rep: Low-density lipoprotein receptor-related protein 6 precursor - Homo sapiens (Human), partial (19%) [TC416355]	XM_002687783		chr5:98171642-98171701	XM_002687783
A_73_121317	0.026769	0.0431091	1.65745	up					chr2:94576538-94576597
A_73_P382201	0.0155631	0.0391379	1.87108	up	ZMYND8	Bos taurus zinc finger, MYND-type containing 8 (ZMYND8), mRNA [NM_001191171]	NM_001191171	zinc finger, MYND-type containing 8	chr13:76528811-76528752	NM_001191171
A_73_P354561	0.0118387	0.0377945	1.5144	up	OSTF1	Bos taurus osteoclast stimulating factor 1 (OSTF1), mRNA [NM_174409]	NM_174409	osteoclast stimulating factor 1	chr8:51500911-51500970	NM_174409
A_73_120941	0.0279401	0.0435098	3.93529	up	EFEMP1	Bos taurus EGF containing fibulin-like extracellular matrix protein 1 (EFEMP1), mRNA [NM_001081717]	NM_001081717	EGF containing fibulin-like extracellular matrix protein 1	chr11:38338871-38338812	NM_001081717
A_73_P490128	0.0344988	0.0457742	2.03067	up		Bos taurus cDNA clone IMAGE:8067199. [BC110239]	BC110239		chr10:000773889-000773948	XM_003588179
A_73_P153266	0.0399471	0.0474259	2.09969	up					chr2:036816888-036816829
A_73_P030051	0.0173017	0.0395801	2.36988	up	LOC100125916	Bos taurus uncharacterized protein 100125016 (LOC100125916), mRNA [NM_001105487]	NM_001105487	uncharacterized protein 100125016	chr23:028331833-028331776	NM_001105487
A_73_P272576	0.0387831	0.0471667	2.25399	up	CFI	Bos taurus complement factor I (CFI), mRNA [NM_001038096]	NM_001038096	complement factor I	chr6:16815142-16815201	NM_001038096
A_73_P119121	0.0175876	0.0396658	2.35145	up	TANC1	PREDICTED: Bos taurus tetratricopeptide repeat, ankyrin repeat and coiled-coil containing 1 (TANC1), partial mRNA [XM_584693]	XM_584693	tetratricopeptide repeat, ankyrin repeat and coiled-coil containing 1	chr2:37237525-37237466	XM_002685349
A_73_P253716	0.0349189	0.045914	1.53474	up	RAB1A	Bos taurus RAB1A, member RAS oncogene family (RAB1A), mRNA [NM_001033628]	NM_001033628	RAB1A, member RAS oncogene family	chr11:63430393-63430334	NM_001033628
A_73_P283206	0.0151398	0.0389517	1.95912	up	CD36	Bos taurus CD36 molecule (thrombospondin receptor) (CD36), mRNA [NM_174010]	NM_174010	CD36 molecule (thrombospondin receptor)	chr4:40598260-40598201	NM_174010
A_73_P451601	0.0452186	0.0486251	1.59325	up		PTPRF interacting protein, binding protein 2 (liprin beta 2) [Source:HGNC Symbol;Acc:9250] [ENSBTAT00000021483]	XM_002693138		chr15:45744896-45744837	XM_002693138
A_73_P426276	0.0285092	0.0436074	1.52374	up	GIMAP7	Bos taurus GTPase, IMAP family member 7 (GIMAP7), mRNA [NM_001046308]	NM_001046308	GTPase, IMAP family member 7	chr4:113781611-113781552	NM_001046308
A_73_P036501	0.0012887	0.0215699	1.83916	up	ILDR1	Bos taurus immunoglobulin-like domain containing receptor 1 (ILDR1), mRNA [NM_001102214]	NM_001102214	immunoglobulin-like domain containing receptor 1	chr1:67082294-67082235	NM_001102214
A_73_P097391	0.000191	0.0162196	2.32076	up	LOC782714	Bos taurus cDNA clone IMAGE:8562090, containing frame-shift errors. [BC149860]	BC149860	40S ribosomal protein S15a-like	chr9:96792344-96792403	XR_083763
A_73_121284	0.049437	0.0498481	2.52058	up		Rep: PAOX protein - Bos taurus (Bovine), partial (11%) [TC474755]			chr7:85219511-85219452
A_73_108469	0.0400052	0.0474259	2.00084	up	KIAA1407	KIAA1407 [Source:HGNC Symbol;Acc:29272] [ENSBTAT00000006550]	XM_612027	KIAA1407 ortholog	chr1:59165977-59162665	XM_612027
A_73_P045646	0.010001	0.0360812	2.55241	up	NRIP3	Bos taurus nuclear receptor interacting protein 3 (NRIP3), mRNA [NM_001102218]	NM_001102218	nuclear receptor interacting protein 3	chr15:44203055-44203114	NM_001102218
A_73_102217	0.0273964	0.0434343	1.50336	up		Rep: Flagellar basal-body P-ring formation protein FlgA - Rhodobacter sphaeroides (strain ATCC 17023 / 2.4.1 / NCIB 8253 / DSM158), partial (10%) [TC416351]			chr13:54252732-54252673
A_73_P403466	0.028697	0.0437961	1.62749	up	ARL4A	Bos taurus ADP-ribosylation factor-like 4A (ARL4A), mRNA [NM_001076985]	NM_001076985	ADP-ribosylation factor-like 4A	chr4:20297140-20297199	NM_001076985
A_73_112350	0.0324087	0.0451668	9.91305	up	DOCK4	dedicator of cytokinesis 4 [Source:HGNC Symbol;Acc:19192] [ENSBTAT00000033728]	CB425205	dedicator of cytokinesis 4	chr4:56877247-56877306	XM_613918
A_73_P209832	0.00112418	0.0206809	2.72249	up	ZNF208	LB004123.CR_F21 GC_BGC-04 Bos taurus cDNA 5', mRNA sequence [EH125053]	EH125053	zinc finger protein 208	chr18:47315526-47318604	XM_003587245
A_73_108441	0.0373051	0.046603	1.65145	up	HRSP12	Bos taurus heat-responsive protein 12 (HRSP12), mRNA [NM_001034208]	NM_001034208	heat-responsive protein 12	chr14:68420580-68420639	NM_001034208
A_73_P073941	0.0119001	0.0377945	4.8116	up	LOC782922	Bos taurus prostaglandin F synthetase II-like (LOC782922), mRNA [NM_001166224]	NM_001166224	prostaglandin F synthetase II-like	chr13:44064826-44064767	NM_001166224
A_73_118080	0.005725	0.0315179	1.89597	up	CEP57	Bos taurus centrosomal protein 57kDa (CEP57), mRNA [NM_181450]	NM_181450	centrosomal protein 57kDa	chr15:14717541-14717482	NM_181450
A_73_106543	0.00085	0.0204135	2.28568	up					chr14:8299969-8300034
A_73_P037556	0.0133549	0.0385179	1.84901	up	SLC12A2	Bos taurus solute carrier family 12 (sodium/potassium/chloride transporters), member 2 (SLC12A2), mRNA [NM_174782]	NM_174782	solute carrier family 12 (sodium/potassium/chloride transporters), member 2	chr7:26973521-26973462	NM_174782
A_73_P478048	0.0380205	0.0467603	1.77035	up	C2H2orf69	chromosome 2 open reading frame 69 [Source:HGNC Symbol;Acc:26799] [ENSBTAT00000053405]	XM_615845	chromosome 2 open reading frame, human C2orf69	chr2:88908362-88908421	XM_002685499
A_73_P342601	0.0472944	0.0493486	1.52894	up	C7H5orf30	Bos taurus UNC119-binding protein C5orf30 homolog (C7H5orf30), mRNA [NM_001076128]	NM_001076128	UNC119-binding protein C5orf30 homolog	chr7:104705294-104705353	NM_001076128
A_73_109788	0.00886259	0.0351263	7.04006	up	GPR119	G protein-coupled receptor 119 [Source:HGNC Symbol;Acc:19060] [ENSBTAT00000019647]	XM_602553	G protein-coupled receptor 119	chrX:14260444-14260385	XM_602553
A_73_P167712	0.0237567	0.0419443	1.72696	up	CYP51A1	Bos taurus cytochrome P450, family 51, subfamily A, polypeptide 1 (CYP51A1), mRNA [NM_001025319]	NM_001025319	cytochrome P450, family 51, subfamily A, polypeptide 1	chr4:9306488-9306429	NM_001025319
A_73_P181767	0.0444528	0.0486199	2.51043	up					chr20:8585820-8585761
A_73_103861	0.00990721	0.0359974	1.85511	up		Rep: PAOX protein - Bos taurus (Bovine), partial (9%) [TC441202]			chrX:140148746-140148687
A_73_P196162	0.0250765	0.0426897	4.52212	up		Rep: Nesprin-1 (Nuclear envelope spectrin repeat protein 1) (Synaptic nuclear envelope protein 1) (Syne-1) (Myocyte nuclear envelope protein 1) (Myne-1) (Enaptin). - Canis familiaris, partial (13%) [TC484344]			chr9:90588937-90588910
A_73_P113991	0.0323988	0.0451668	2.34114	up		Cas scaffolding protein family member 4 [Source:HGNC Symbol;Acc:15878] [ENSBTAT00000019348]	XM_002692272		chr13:60037428-60037369	XM_002692272
A_73_115883	0.0479579	0.0495346	1.65075	up	DNAJC9	Bos taurus DnaJ (Hsp40) homolog, subfamily C, member 9 (DNAJC9), mRNA [NM_001205686]	NM_001205686	DnaJ (Hsp40) homolog, subfamily C, member 9	chr28:29452571-29452512	NM_001205686
A_73_P415681	0.00929398	0.0351493	2.00362	up	MYOF	Bos taurus myoferlin (MYOF), mRNA [NM_001193212]	NM_001193212	myoferlin	chr26:14667660-14667601	NM_001193212
A_73_P036311	0.0439865	0.0484757	3.01961	up	HOMER1	Bos taurus homer homolog 1 (Drosophila) (HOMER1), mRNA [NM_001076052]	NM_001076052	homer homolog 1 (Drosophila)	chr10:10350838-10350779	NM_001076052
A_73_105998	0.00665368	0.0328978	1.99707	up		Rep: solute carrier family 12 (sodium/potassium/chloride transporters), member 2 - Bos Taurus, partial (29%) [TC447478]			chr7:26973291-26973232
A_73_119364	0.0301024	0.0444784	2.64646	up	ALDH1A1	Bos taurus aldehyde dehydrogenase 1 family, member A1 (ALDH1A1), mRNA [NM_174239]	NM_174239	aldehyde dehydrogenase 1 family, member A1	chr8:49354293-49354234	NM_174239
A_73_112305	0.0357208	0.0462865	1.75731	up		Rep: Plexin-C1 precursor - Homo sapiens (Human), partial (9%) [TC423898]			chr5:24225204-24225263
A_73_104115	0.0273192	0.0433792	2.56456	up	MTX3	metaxin 3 [Source:HGNC Symbol;Acc:24812] [ENSBTAT00000017457]	XM_868998	metaxin 3	chr10:10895935-10895876	XM_868998
A_73_P335251	0.000342	0.0178726	20.7104	up	GNG4	Bos taurus guanine nucleotide binding protein (G protein), gamma 4 (GNG4), mRNA [NM_001103324]	NM_001103324	guanine nucleotide binding protein (G protein), gamma 4	chr28:8340356-8340297	NM_001103324
A_73_P086776	0.0453535	0.0486251	1.79858	up	CDC14B	Bos taurus CDC14 cell division cycle 14 homolog B (S. cerevisiae) (CDC14B), mRNA [NM_001193238]	NM_001193238	CDC14 cell division cycle 14 homolog B (S. cerevisiae)	chr8:84634159-84629343	NM_001193238
A_73_117296	0.0468519	0.0491379	1.74661	up	NAE1	Bos taurus NEDD8 activating enzyme E1 subunit 1 (NAE1), mRNA [NM_001193033]	NM_001193033	NEDD8 activating enzyme E1 subunit 1	chr18:34651449-34649995	NM_001193033
A_73_100492	0.0429552	0.0482213	4.16673	up	FABP2	Bos taurus fatty acid binding protein 2, intestinal (FABP2), mRNA [NM_001025332]	NM_001025332	fatty acid binding protein 2, intestinal	chr6:7105225-7105166	NM_001025332
A_73_P069701	0.0314131	0.04496	1.81552	up	EFCAB9	EF-hand calcium binding domain 9 [Source:HGNC Symbol;Acc:34530] [ENSBTAT00000011687]	XM_002696269	EF-hand calcium binding domain 9	chr20:3897229-3897286	XM_002696269
A_73_P075206	0.00173002	0.0233022	2.14662	up	TBCEL	Bos taurus tubulin folding cofactor E-like (TBCEL), mRNA [NM_001205453]	NM_001205453	tubulin folding cofactor E-like	chr15:32249011-32249070	NM_001205453
A_73_108267	0.00880652	0.0351263	4.5793	up	LOC616942	Bos taurus major histocompatibility complex, class I, A-like (LOC616942), mRNA [NM_001206459]	NM_001206459	major histocompatibility complex, class I, A-like	chr23:27846367-27846427	NM_001206459
A_73_100085	0.0253631	0.0427676	1.68247	up		HW_Fat_7_G02 Bos taurus CF-24-HW fat cDNA library Bos taurus cDNA, mRNA sequence [DV776940]	DV776940		chr28:3868776-3868836
A_73_P055916	0.0354503	0.046108	2.1933	up		PREDICTED: Bos taurus interferon-induced very large GTPase 1-like (LOC508070), miscRNA [XR_083859]	XR_083859		chr15:46858463-46858522	XR_083455
A_73_101958	0.0492202	0.0498302	1.66416	up	EOGT	Bos taurus chromosome 22 open reading frame, human C3orf64 (EOGT), mRNA [NM_001077882]	NM_001077882	chromosome 22 open reading frame, human C3orf64	chr22:32655275-32655938	NM_001077882
A_73_P049201	0.0347242	0.0457847	1.91791	up	LOC618367	Bos taurus uncharacterized LOC618367 (LOC618367), mRNA [NM_001105009]	NM_001105009	uncharacterized LOC618367	chr29:42495238-42495297	NM_001105009
A_73_103956	0.0144592	0.0385974	1.59079	up		Rep: Sperm-associated antigen 1 (Infertility-related sperm protein Spag-1) (HSD-3.8). - Bos Taurus, partial (28%) [TC400063]	XM_002692798		chr14:66319397-66319338	XM_002692798
A_73_114416	0.0257488	0.0429069	2.15361	up	GRB14	Bos taurus growth factor receptor-bound protein 14 (GRB14), mRNA [NM_001011681]	NM_001011681	growth factor receptor-bound protein 14	chr2:31911396-31911455	NM_001011681
A_73_111966	0.000425	0.0181226	2.20534	up	SPATS2L	Bos taurus spermatogenesis associated, serine-rich 2-like (SPATS2L), mRNA [NM_001192987]	NM_001192987	spermatogenesis associated, serine-rich 2-like	chr2:89439470-89439529	NM_001192987
A_73_P169247	0.0481698	0.0495833	1.86788	up	MLL5	Bos taurus myeloid/lymphoid or mixed-lineage leukemia 5 (trithorax homolog, Drosophila) (MLL5), mRNA [NM_001082451]	NM_001082451	myeloid/lymphoid or mixed-lineage leukemia 5 (trithorax homolog, Drosophila)	chr4:46497086-46497145	NM_001082451
A_73_105770	0.00272463	0.0264938	1.95464	up		Rep: Butyrophilin, subfamily 3, member A1 - Homo sapiens (Human), partial (40%) [TC446835]			chr23:31384174-31384115
A_73_P390626	0.00438695	0.0301621	5.08022	up	CYB5R2	cytochrome b5 reductase 2 [Source:HGNC Symbol;Acc:24376] [ENSBTAT00000021485]	XM_002693123	cytochrome b5 reductase 2	chr15:45653965-45654024	XM_002693123
A_73_P048541	0.0330754	0.0451668	1.75169	up	SP140L	Bos taurus SP140 nuclear body protein-like (SP140L), mRNA [NM_001130765]	NM_001130765	SP140 nuclear body protein-like	chr2:119206098-119206157	NM_001130765
A_73_119855	0.0322532	0.0451668	3.79468	up		Rep: MGC139378 protein - Bos taurus (Bovine), partial (6%) [TC455458]			chr4:25090748-25090689
A_73_P114026	0.0172206	0.0395568	1.68852	up	CUL5	Uncharacterized protein [Source:UniProtKB/TrEMBL;Acc:F1N7B5] [ENSBTAT00000061240]	XM_002692966	cullin 5	chr15:17983703-17983762	XM_002692966
A_73_P494569	0.00204384	0.0242646	2.36932	up					chr14:021890540-021890481
A_73_P038726	0.0203646	0.0405028	1.61149	up	UBE2Q2	Bos taurus ubiquitin-conjugating enzyme E2Q family member 2 (UBE2Q2), mRNA [NM_001075530]	NM_001075530	ubiquitin-conjugating enzyme E2Q family member 2	chr21:31708668-31710821	NM_001075530
A_73_111277	0.00202616	0.0242646	1.59221	up	FAM114A2	Bos taurus family with sequence similarity 114, member A2 (FAM114A2), mRNA [NM_001038077]	NM_001038077	family with sequence similarity 114, member A2	chr7:67287343-67287284	NM_001038077
A_73_P109557	0.0483332	0.0495833	4.09781	up		Rep: Multidrug resistance protein 4 - Rattus norvegicus, partial (28%) [TC452906]	XM_606835			XM_606835
A_73_103946	0.01148	0.0374277	6.40645	up	LAP	Bos taurus lingual antimicrobial peptide (LAP), mRNA [NM_203435]	NM_203435	lingual antimicrobial peptide	chr27:5125882-5125941	NM_203435
A_73_P110176	0.0330981	0.0451668	1.74167	up	VNN1	Bos taurus vanin 1 (VNN1), mRNA [NM_001024556]	NM_001024556	vanin 1	chr9:71833431-71833372	NM_001024556
A_73_113919	0.0225309	0.0413398	2.47885	up		Rep: IKAROS family zinc finger 2 - Bos taurus (Bovine), partial (11%) [TC436096]	XM_002685287		chr2:20769709-20769650	XM_002685287
A_73_P086621	0.000975	0.0204442	6.05933	up	ADAMDEC1	Bos taurus ADAM-like, decysin 1 (ADAMDEC1), mRNA [NM_001206371]	NM_001206371	ADAM-like, decysin 1	chr8:72516211-72516270	NM_001206371
A_73_P115856	0.0124183	0.0378883	7.20177	up	GSTM3	Bos taurus glutathione S-transferase mu 3 (brain) (GSTM3), mRNA [NM_001046560]	NM_001046560	glutathione S-transferase mu 3 (brain)	chr3:33770633-33770692	NM_001046560
A_73_P190882	0.025614	0.0429069	3.01916	up	HGF	Bos taurus hepatocyte growth factor (hepapoietin A; scatter factor) (HGF), mRNA [NM_001031751]	NM_001031751	hepatocyte growth factor (hepapoietin A; scatter factor)	chr4:39123536-39129062	NM_001031751
A_73_P318291	0.00972732	0.0357895	2.26553	up	ODF2L	Bos taurus outer dense fiber of sperm tails 2-like (ODF2L), mRNA [NM_001075993]	NM_001075993	outer dense fiber of sperm tails 2-like	chr3:57838220-57838279	NM_001075993
A_73_114759	0.0215253	0.0410334	1.77313	up	ERAP1	Bos taurus endoplasmic reticulum aminopeptidase 1 (ERAP1), mRNA [NM_001102003]	NM_001102003	endoplasmic reticulum aminopeptidase 1	chr7:98582949-98582890	NM_001102003
A_73_116549	0.000648	0.0181226	3.10551	up					chr13:044205064-044205005
A_73_P042571	0.046123	0.0489114	1.86263	up	LOC508153	Bos taurus myeloid-associated differentiation marker-like (LOC508153), mRNA [NM_001100322]	NM_001100322	myeloid-associated differentiation marker-like	chr21:20429413-20429472	NM_001100322
A_73_P254651	0.00237675	0.0251024	1.79102	up	FAM151B	Bos taurus family with sequence similarity 151, member B (FAM151B), mRNA [NM_001099713]	NM_001099713	family with sequence similarity 151, member B	chr7:82950831-82955967	NM_001099713
A_73_111396	0.00878019	0.0351263	1.96074	up	PCBD1	Bos taurus pterin-4 alpha-carbinolamine dehydratase/dimerization cofactor of hepatocyte nuclear factor 1 alpha (PCBD1), mRNA [NM_001206474]	NM_001206474	pterin-4 alpha-carbinolamine dehydratase/dimerization cofactor of hepatocyte nuclear factor 1 alpha	chr28:27226885-27226826	NM_001206474
A_73_P036481	0.0162303	0.039183	1.58562	up	PMPCB	Bos taurus peptidase (mitochondrial processing) beta (PMPCB), nuclear gene encoding mitochondrial protein, mRNA [NM_001034613]	NM_001034613	peptidase (mitochondrial processing) beta	chr4:44769333-44769392	NM_001034613
A_73_P307601	0.0402926	0.0474259	1.60041	up	ADAM17	ADAM metallopeptidase domain 17 [Source:HGNC Symbol;Acc:195] [ENSBTAT00000065783]	XM_002691486	ADAM metallopeptidase domain 17	chr11:87923716-87923773	XM_002691486
A_73_115215	0.0141535	0.0385974	2.06322	up	FPGT	Bos taurus fucose-1-phosphate guanylyltransferase (FPGT), mRNA [NM_001191283]	NM_001191283	fucose-1-phosphate guanylyltransferase	chr3:70880725-70880666	NM_001191283
A_73_P040826	2.49e-05	0.00635788	2.83024	up	C11H2orf43	Bos taurus chromosome 11 open reading frame, human C2orf43 (C11H2orf43), mRNA [NM_001079608]	NM_001079608	chromosome 11 open reading frame, human C2orf43	chr11:78189375-78189434	NM_001079608
A_73_P096576	0.0438528	0.0484757	1.7063	up	FNDC3B	Bos taurus fibronectin type III domain containing 3B (FNDC3B), mRNA [NM_001206211]	NM_001206211	fibronectin type III domain containing 3B	chr1:95891073-95891014	NM_001206211
A_73_113783	0.00785149	0.0343292	4.67299	up		LB02932.CR_A16 GC_BGC-29 Bos taurus cDNA clone IMAGE:8240922, mRNA sequence [DV923705]	DV923705		chr1:148299271-148299213	XM_865548
A_73_P079906	0.0363061	0.0465199	1.8989	up	MAP4K5	Bos taurus mitogen-activated protein kinase kinase kinase kinase 5 (MAP4K5), mRNA [NM_001191128]	NM_001191128	mitogen-activated protein kinase kinase kinase kinase 5	chr10:43357940-43357881	NM_001191128
A_73_P465813	0.0270859	0.0432443	1.81174	up		Rep: LOC512905 protein - Bos taurus (Bovine), partial (32%) [TC473295]	XM_003582241		chr5:74652008-74652067	XM_003582241
A_73_120760	0.0394825	0.0474259	1.77084	up	CLU	Bos taurus clusterin (CLU), mRNA [NM_173902]	NM_173902	clusterin	chr8:11061213-11061272	NM_173902
A_73_P438036	0.0187331	0.039827	1.59791	up	ARHGAP26	Bos taurus Rho GTPase activating protein 26 (ARHGAP26), mRNA [NM_001205522]	NM_001205522	Rho GTPase activating protein 26	chr7:55853249-55853308	NM_001205522
A_73_P293111	0.0467577	0.0490644	2.21247	up	AHCTF1	Bos taurus AT hook containing transcription factor 1 (AHCTF1), mRNA [NM_001192036]	NM_001192036	AT hook containing transcription factor 1	chr16:31245240-31245299	NM_001192036
A_73_P142236	0.0116352	0.0376985	2.56506	up	MYOM1	Bos taurus myomesin 1, 185kDa (MYOM1), mRNA [NM_001191466]	NM_001191466	myomesin 1, 185kDa	chr24:37673685-37673626	NM_001191466
A_73_P084766	0.0174878	0.0396658	2.67486	up	ZFP62		XM_583727	zinc finger protein 62 homolog (mouse)	chr7:41404532-41404473	XM_002689031
A_73_114213	0.0130946	0.0385179	2.55963	up		Rep: Enoyl-CoA-hydratase-like - Oryza sativa subsp. japonica (Rice), partial (13%) [TC420287]	XM_001255634		chr21:22726265-22726206	XM_001255634
A_73_P087456	0.021355	0.0410334	1.64291	up		Hw_Fat_41_050806_H08 Bos taurus CF-24-HW fat cDNA library Bos taurus cDNA, mRNA sequence [DV776311]	DV776311		chr6:59798252-59798311	XM_002688202
A_73_P081141	0.00735626	0.0339853	1.62154	up	DSE	Bos taurus dermatan sulfate epimerase (DSE), mRNA [NM_001113232]	NM_001113232	dermatan sulfate epimerase	chr9:34719072-34719013	NM_001113232
A_73_P115431	0.00389181	0.029325	2.0299	up	C4H7orf72	chromosome 7 open reading frame 72 [Source:HGNC Symbol;Acc:22564] [ENSBTAT00000061416]	XM_002704036	chromosome 4 open reading frame, human C7orf72	chr4:5661134-5661075	XM_002686634
A_73_P136721	0.0123667	0.0378604	1.74984	up	MSRB3	PREDICTED: Bos taurus methionine sulfoxide reductase B3, transcript variant 3 (MSRB3), mRNA [XM_001250168]	XM_001250168	methionine sulfoxide reductase B3	chr5:48560949-48560890	XM_001250168
A_73_P147861	0.0465727	0.0490018	2.6593	up	GALNT14	Bos taurus UDP-N-acetyl-alpha-D-galactosamine:polypeptide N-acetylgalactosaminyltransferase 14 (GalNAc-T14) (GALNT14), mRNA [NM_001192732]	NM_001192732	UDP-N-acetyl-alpha-D-galactosamine:polypeptide N-acetylgalactosaminyltransferase 14 (GalNAc-T14)	chr11:68963520-68963579	NM_001192732
A_73_105814	0.0485663	0.0496855	2.26346	up	NPPA	Bos taurus natriuretic peptide A (NPPA), mRNA [NM_174124]	NM_174124	natriuretic peptide A	chr16:042712628-042712680	NM_174124
A_73_118748	0.0162176	0.039183	2.39739	up					chr16:46466466-46466407
A_73_P031326	0.00509783	0.0311376	1.63169	up	TUBA4A	Bos taurus tubulin, alpha 4a (TUBA4A), mRNA [NM_001078158]	NM_001078158	tubulin, alpha 4a	chr2:107921789-107921730	NM_001078158
A_73_P061777	0.0413434	0.0477332	1.79408	up	NUP54	Bos taurus nucleoporin 54kDa (NUP54), mRNA [NM_001075285]	NM_001075285	nucleoporin 54kDa	chr6:92758862-92758803	NM_001075285
A_73_105356	0.00103122	0.0204442	1.57684	up	PLCD4	Bos taurus phospholipase C, delta 4 (PLCD4), mRNA [NM_001046489]	NM_001046489	phospholipase C, delta 4	chr2:107320663-107320722	NM_001046489
A_73_P389326	0.025518	0.042887	1.5114	up	ANO6	anoctamin 6 [Source:HGNC Symbol;Acc:25240] [ENSBTAT00000003770]	XM_600052	anoctamin 6	chr5:35150409-35150350	XM_002687355
A_73_P091241	0.0494278	0.0498481	1.84109	up	KRAS	Bos taurus v-Ki-ras2 Kirsten rat sarcoma viral oncogene homolog (KRAS), mRNA [NM_001110001]	NM_001110001	v-Ki-ras2 Kirsten rat sarcoma viral oncogene homolog	chr5:85192757-85192816	NM_001110001
A_73_P067476	0.0125629	0.0378883	2.46972	up	ZNF569	zinc finger protein 569 [Source:HGNC Symbol;Acc:24737] [ENSBTAT00000031518]	XM_864866	zinc finger protein 569	chr18:47619495-47619436	XM_001252643
A_73_P290081	0.04382	0.0484757	2.09457	up		discs, large homolog 1 (Drosophila) [Source:HGNC Symbol;Acc:2900] [ENSBTAT00000027161]	XM_001787491		chr1:72159711-72159652	XM_001787491
A_73_P087656	0.00894883	0.0351263	2.6036	up	CEP135	CEP135 proteinUncharacterized protein [Source:UniProtKB/TrEMBL;Acc:Q32KW4] [ENSBTAT00000046289]	BC109893	centrosomal protein 135kDa	chr6:73030027-73030086
A_73_P494223	0.0318089	0.0450857	1.71293	up		Rep: MGC152498 protein - Bos taurus (Bovine), complete [TC392245]	XM_003582237		chr5:74734645-74734703	XM_003582237
A_73_110764	0.0022337	0.0246552	6.98517	up		60010 MARC 4BOV Bos taurus cDNA 5', mRNA sequence [AW426264]	AW426264		chr16:60746913-60746854
A_73_119395	0.0346137	0.0457847	4.34793	up		Rep: Girdin - Homo sapiens (Human), partial (8%) [TC434982]			chr11:37877104-37877045
A_73_120465	0.0180483	0.0397356	1.7819	up	ZNF582	zinc finger protein 582 [Source:RefSeq peptide;Acc:NP_001098496] [ENSBTAT00000063919]	XR_139134	zinc finger protein 582	chr18:63987362-63987421	XM_002695473
A_73_114120	0.0391208	0.0473442	1.98072	up	MAP2	Bos taurus microtubule-associated protein 2 (MAP2), mRNA [NM_001205807]	NM_001205807	microtubule-associated protein 2	chr2:97987691-97987971	NM_001205807
A_73_118245	0.00143507	0.0225417	1.57606	up	PKIB	Bos taurus protein kinase (cAMP-dependent, catalytic) inhibitor beta (PKIB), mRNA [NM_001114518]	NM_001114518	protein kinase (cAMP-dependent, catalytic) inhibitor beta	chr9:28880186-28880127	NM_001114518
A_73_P358016	0.00694359	0.0335991	3.11994	up		LB0298.CR_D03 GC_BGC-29 Bos taurus cDNA clone IMAGE:8232917, mRNA sequence [DV925383]	DV925383		chr8:96885326-96885385	XM_002689908
A_73_P069131	0.00168278	0.0230619	1.81951	up	LOC786652	Uncharacterized protein [Source:UniProtKB/TrEMBL;Acc:E1B8H0] [ENSBTAT00000006782]	XM_003583743	pseudopodium-enriched atypical kinase 1-like	chr21:32773808-32773749	XM_003583743
A_73_P040606	0.043945	0.0484757	1.64425	up	C28H1orf198	Bos taurus chromosome 28 open reading frame, human C1orf198 (C28H1orf198), mRNA [NM_001040592]	NM_001040592	chromosome 28 open reading frame, human C1orf198	chr28:3865915-3865974	NM_001040592
A_73_P031716	0.000551	0.0181226	2.5856	up	FIBIN	Bos taurus fin bud initiation factor homolog (zebrafish) (FIBIN), mRNA [NM_001015541]	NM_001015541	fin bud initiation factor homolog (zebrafish)	chr15:58481025-58481084	NM_001015541
A_73_P114211	0.000742	0.0193598	2.63557	up	FRY	Bos taurus furry homolog (Drosophila) (FRY), mRNA [NM_001205616]	NM_001205616	furry homolog (Drosophila)	chr12:28769550-28769491	NM_001205616
A_73_P421041	0.0349664	0.0459469	1.56651	up	CAST	Bos taurus calpastatin (CAST), transcript variant 1, mRNA [NM_001030318]	NM_001030318	calpastatin	chr7:98544986-98545522	NM_001030318
A_73_114983	0.042324	0.0480274	1.95899	up	TPPP	Bos taurus tubulin polymerization promoting protein (TPPP), mRNA [NM_173976]	NM_173976	tubulin polymerization promoting protein	chr20:71562039-71561980	NM_173976
A_73_P104636	0.0368595	0.046603	1.83697	up		Bos taurus cDNA clone IMAGE:8204118. [BC133536]	BC133536		chr17:18711844-18711903
A_73_P080356	0.0373262	0.046603	2.27729	up	MGC148318	Bos taurus uncharacterized LOC782788 (MGC148318), non-coding RNA [NR_038117]	NR_038117	uncharacterized LOC782788	chr10:74530188-74530247	NR_038117
A_73_P287811	0.00711034	0.033759	4.50464	up	GNG4	Bos taurus guanine nucleotide binding protein (G protein), gamma 4 (GNG4), mRNA [NM_001103324]	NM_001103324	guanine nucleotide binding protein (G protein), gamma 4	chr28:8341912-8341853	NM_001103324
A_73_P091161	0.0182692	0.0397356	3.34538	up	CARD10	CR852642 Normalized and Subtracted bovine endometrium tissues (bcbp) Bos taurus cDNA clone bcbp0007.h.24 5', mRNA sequence [CR852642]	CR852642	caspase recruitment domain family, member 10	chr5:76287217-76287158	XM_615197
A_73_P317311	0.021622	0.0410335	1.6658	up	STAU2	Bos taurus staufen, RNA binding protein, homolog 2 (Drosophila) (STAU2), mRNA [NM_001103313]	NM_001103313	staufen, RNA binding protein, homolog 2 (Drosophila)	chr14:38986280-38986221	NM_001103313
A_73_P112946	0.0466614	0.0490137	1.75186	up	CLTC	Bos taurus clathrin, heavy chain (Hc) (CLTC), mRNA [NM_174023]	NM_174023	clathrin, heavy chain (Hc)	chr19:10886987-10889128	NM_174023
A_73_120378	0.0184819	0.0397356	3.79793	up		Rep: Tyrosine-protein phosphatase non-receptor type 21 (EC 3.1.3.48) (Protein-tyrosine phosphatase D1). - Canis familiaris, partial (30%) [TC410115]			chr10:101234982-101234923
A_73_P093356	0.0342865	0.0456773	1.60448	up		Rep: Blr0369 protein - Bradyrhizobium japonicum, partial (6%) [TC410225]			chr3:91868342-91868401
A_73_111882	0.048326	0.0495833	3.34906	up	ABCA4	Bos taurus ATP-binding cassette, sub-family A (ABC1), member 4 (ABCA4), mRNA [NM_174221]	NM_174221	ATP-binding cassette, sub-family A (ABC1), member 4	chr3:49686283-49686342	NM_174221
A_73_103163	0.0105446	0.0367046	6.20746	up	CRABP2	cellular retinoic acid-binding protein 2 [Source:RefSeq peptide;Acc:NP_001008670] [ENSBTAT00000007515]	BC142037	cellular retinoic acid binding protein 2	chr3:14178509-14178568
A_73_P424791	0.0317556	0.0450857	1.54363	up	IQGAP1	IQ motif containing GTPase activating protein 1 [Source:HGNC Symbol;Acc:6110] [ENSBTAT00000017366]	EE355059	IQ motif containing GTPase activating protein 1	chr21:22556484-22555354	XM_002696571
A_73_P435601	0.0156139	0.039183	2.02146	up	PRDM4	PR domain zinc finger protein 4 [Source:UniProtKB/TrEMBL;Acc:E1BDK1] [ENSBTAT00000017284]	EE385006	PR domain containing 4	chr5:71338232-71333959	XM_002687670
A_73_P170332	0.00026	0.0174316	3.16364	up		PREDICTED: Bos taurus family with sequence similarity 185, member A (FAM185A), mRNA [XM_002686772]	XM_002686772		chr4:44371417-44371476	XM_002686772
A_73_116640	0.0123037	0.0378336	4.06414	up	MYBPH	Bos taurus myosin binding protein H (MYBPH), mRNA [NM_001075435]	NM_001075435	myosin binding protein H	chr16:761344-761285	NM_001075435
A_73_P071766	0.016764	0.0393442	2.77036	up	C16H1orf95	Bos taurus chromosome 16 open reading frame, human C1orf95 (C16H1orf95), mRNA [NM_001083770]	NM_001083770	chromosome 16 open reading frame, human C1orf95	chr16:30352476-30359147	NM_001083770
A_73_P103696	0.00591571	0.0317057	2.40705	up	SPATS2L	Bos taurus spermatogenesis associated, serine-rich 2-like (SPATS2L), mRNA [NM_001192987]	NM_001192987	spermatogenesis associated, serine-rich 2-like	chr2:89367745-89372532	NM_001192987
A_73_111917	0.0370823	0.046603	3.68783	up	GPLD1	Bos taurus glycosylphosphatidylinositol specific phospholipase D1 (GPLD1), mRNA [NM_174816]	NM_174816	glycosylphosphatidylinositol specific phospholipase D1	chr23:33035976-33036035	NM_174816
A_73_P426897	0.00673202	0.0330085	1.84312	up	HMGCS1	Bos taurus HMGCS1 protein-like (HMGCS1), mRNA [NM_001206578]	NM_001206578	HMGCS1 protein-like	chr20:31475481-31475540	NM_001206578
A_73_P084791	0.0179015	0.0397356	1.75711	up	TRIM7	Bos taurus tripartite motif containing 7 (TRIM7), mRNA [NM_001205446]	NM_001205446	tripartite motif containing 7	chr7:41721434-41720893	NM_001205446
A_73_107081	0.00408696	0.0297567	1.5843	up	PLD2	Bos taurus phospholipase D2 (PLD2), mRNA [NM_001075827]	NM_001075827	phospholipase D2	chr19:27177040-27176981	NM_001075827
A_73_P341066	0.000461	0.0181226	1.74823	up	ZNF567	Bos taurus zinc finger protein 567 (ZNF567), mRNA [NM_001081599]	NM_001081599	zinc finger protein 567	chr18:47091007-47090948	NM_001081599
A_73_102355	0.00185343	0.0236639	3.2379	up	ACTA2	Bos taurus actin, alpha 2, smooth muscle, aorta (ACTA2), mRNA [NM_001034502]	NM_001034502	actin, alpha 2, smooth muscle, aorta	chr26:10662505-10662446	NM_001034502
A_73_P043011	0.014387	0.0385974	1.62907	up	CYP51A1	Bos taurus cytochrome P450, family 51, subfamily A, polypeptide 1 (CYP51A1), mRNA [NM_001025319]	NM_001025319	cytochrome P450, family 51, subfamily A, polypeptide 1	chr4:9306973-9306914	NM_001025319
A_73_110527	0.0272404	0.0433284	1.93808	up	ERCC8	Bos taurus excision repair cross-complementing rodent repair deficiency, complementation group 8 (ERCC8), mRNA [NM_001110181]	NM_001110181	excision repair cross-complementing rodent repair deficiency, complementation group 8	chr20:18394450-18396362	NM_001110181
A_73_P086851	0.00114655	0.020719	2.83123	up	ZNF169	zinc finger protein 169 [Source:HGNC Symbol;Acc:12957] [ENSBTAT00000006604]	XM_609847	zinc finger protein 169	chr8:86974665-86974724	XM_002689853
A_73_P138521	0.0112993	0.0374277	2.28557	up	VWF	Bos taurus von Willebrand factor (VWF), mRNA [NM_001205308]	NM_001205308	von Willebrand factor	chr5:104722779-104722838	NM_001205308
A_73_110433	0.0102396	0.0362378	3.55551	up	PTPN4	Bos taurus protein tyrosine phosphatase, non-receptor type 4 (megakaryocyte) (PTPN4), mRNA [NM_001192946]	NM_001192946	protein tyrosine phosphatase, non-receptor type 4 (megakaryocyte)	chr2:72124844-72125768	NM_001192946
A_73_113599	0.0121714	0.0377945	1.80734	up	ZNF583	Bos taurus zinc finger protein 583 (ZNF583), mRNA [NM_001083534]	NM_001083534	zinc finger protein 583	chr18:63903805-63903746	NM_001083534
A_73_P038156	0.00913451	0.0351493	2.02362	up	FAM70A	Bos taurus family with sequence similarity 70, member A (FAM70A), mRNA [NM_001083721]	NM_001083721	family with sequence similarity 70, member A	chrX:5043004-5043063	NM_001083721
A_73_114844	0.0145034	0.0385974	3.63981	up	ADTRP	Bos taurus androgen-dependent TFPI-regulating protein (ADTRP), mRNA [NM_001037621]	NM_001037621	androgen-dependent TFPI-regulating protein	chr23:44536780-44536839	NM_001037621
A_73_P271198	0.0313708	0.04496	1.59358	up	CRYZ	Bos taurus crystallin, zeta (quinone reductase) (CRYZ), mRNA [NM_174025]	NM_174025	crystallin, zeta (quinone reductase)	chr3:70264150-70269976	NM_174025
A_73_111026	0.047686	0.0494527	1.75521	up	ASUN	Bos taurus asunder, spermatogenesis regulator homolog (Drosphila) (ASUN), mRNA [NM_001046499]	NM_001046499	asunder, spermatogenesis regulator homolog (Drosphila)	chr5:83303614-83303673	NM_001046499
A_73_119820	0.00220665	0.024489	1.55652	up	RNF214	Bos taurus ring finger protein 214 (RNF214), mRNA [NM_001206820]	NM_001206820	ring finger protein 214	chr15:28396689-28396748	NM_001206820
A_73_P247611	0.0330242	0.0451668	2.61714	up	IGFBP7	Bos taurus insulin-like growth factor binding protein 7 (IGFBP7), mRNA [NM_001102300]	NM_001102300	insulin-like growth factor binding protein 7	chr6:74071233-74071174	NM_001102300
A_73_P093016	0.0241168	0.042085	2.31651	up		Uncharacterized protein [Source:UniProtKB/TrEMBL;Acc:F1N1I1] [ENSBTAT00000054825]	XM_003581986		chr3:54848212-54848271	XM_003581986
A_73_116965	0.0244118	0.0422448	1.59322	up	FSTL4	follistatin-like 4 [Source:HGNC Symbol;Acc:21389] [ENSBTAT00000022743]	XM_613235	follistatin-like 4	chr7:46454513-46454454	XM_613235
A_73_P103871	0.0058632	0.0317057	2.24043	up	AGPAT4	Bos taurus cDNA clone IMAGE:8166104. [BC114144]	BC114144	1-acylglycerol-3-phosphate O-acyltransferase 4 (lysophosphatidic acid acyltransferase, delta)	chr9:98268280-98268221
A_73_105191	0.0198738	0.0402776	2.40445	up		Rep: AHI1 - Homo sapiens (Human), partial (7%) [TC418016]			chr9:74374237-74374178
A_73_P191402	0.021941	0.0411482	2.33135	up	GEM	Bos taurus GTP binding protein overexpressed in skeletal muscle (GEM), mRNA [NM_001083732]	NM_001083732	GTP binding protein overexpressed in skeletal muscle	chr14:72395208-72395267	NM_001083732
A_73_P282541	0.000584	0.0181226	6.48099	up	LOC512440	Bos taurus myeloid-associated differentiation marker-like (LOC512440), mRNA [NM_001101956]	NM_001101956	myeloid-associated differentiation marker-like	chr21:20128758-20128699	NM_001101956
A_73_P344521	0.0477332	0.0494527	2.68308	up	PNPT1	Bos taurus polyribonucleotide nucleotidyltransferase 1 (PNPT1), mRNA [NM_001192197]	NM_001192197	polyribonucleotide nucleotidyltransferase 1	chr11:38161172-38161134	NM_001192197
A_73_P129491	0.0394072	0.0474259	1.72604	up	MAP2	Bos taurus microtubule-associated protein 2 (MAP2), mRNA [NM_001205807]	NM_001205807	microtubule-associated protein 2	chr2:97991658-97991717	NM_001205807
A_73_P144656	0.049756	0.0499046	1.78975	up		1391940 MARC 7BOV Bos taurus cDNA 5', mRNA sequence [DN543129]	DN543129		chr21:33081162-33081103
A_73_113043	0.0230413	0.0417112	1.60085	up		Rep: Beta-2-microglobulin precursor - Bos taurus (Bovine), partial (31%) [TC455884]			chr2:094556084-094556143
A_73_P034856	0.0114789	0.0374277	5.04175	up	ART5	Bos taurus ADP-ribosyltransferase 5 (ART5), mRNA [NM_001076515]	NM_001076515	ADP-ribosyltransferase 5	chr15:52259480-52259539	NM_001076515
A_73_115314	0.0475542	0.0494429	2.34149	up	AVIL	Bos taurus advillin (AVIL), mRNA [NM_001192529]	NM_001192529	advillin	chr5:56001898-56001957	NM_001192529
A_73_P092661	0.0417322	0.0479211	2.46804	up	MAN1A2	Bos taurus mannosidase, alpha, class 1A, member 2 (MAN1A2), mRNA [NM_001206877]	NM_001206877	mannosidase, alpha, class 1A, member 2	chr3:25821183-25821124	NM_001206877
A_73_P360291	0.0347713	0.0457847	1.95363	up	NBN	Bos taurus nibrin (NBN), mRNA [NM_001075837]	NM_001075837	nibrin	chr14:76120775-76120834	NM_001075837
A_73_108356	0.0055183	0.0314574	2.87731	up		1250279 MARC 7BOV Bos taurus cDNA 5', mRNA sequence [DN513343]	DN513343		chr28:13617547-13617606
A_73_113899	0.00478682	0.0306666	1.99544	up	RG9MTD2	Bos taurus RNA (guanine-9-) methyltransferase domain containing 2 (RG9MTD2), mRNA [NM_001035477]	NM_001035477	RNA (guanine-9-) methyltransferase domain containing 2	chr6:26468835-26468894	NM_001035477
A_73_118403	0.00575989	0.0316175	2.21346	up	VWF	Bos taurus von Willebrand factor (VWF), mRNA [NM_001205308]	NM_001205308	von Willebrand factor	chr5:104727114-104727173	NM_001205308
A_73_120060	0.0290616	0.0440236	3.78089	up	PROS1	Bos taurus protein S (alpha) (PROS1), mRNA [NM_174438]	NM_174438	protein S (alpha)	chr1:37803469-37803410	NM_174438
A_73_120448	0.0203902	0.0405028	2.75177	up	MYOF	Bos taurus myoferlin (MYOF), mRNA [NM_001193212]	NM_001193212	myoferlin	chr26:14817508-14796541	NM_001193212
A_73_117396	0.0270504	0.0432443	1.51437	up	ZNF445	Bos taurus zinc finger protein 445 (ZNF445), mRNA [NM_001205819]	NM_001205819	zinc finger protein 445	chr22:16369868-16369809	NM_001205819
A_73_P095291	0.0111308	0.0374277	1.8628	up	SERINC2	Bos taurus serine incorporator 2 (SERINC2), mRNA [NM_001035285]	NM_001035285	serine incorporator 2	chr2:122817674-122817730	NM_001035285
A_73_P252621	0.04523	0.0486251	1.54992	up	SCP2	Bos taurus sterol carrier protein 2 (SCP2), mRNA [NM_001033990]	NM_001033990	sterol carrier protein 2	chr3:93849863-93847468	NM_001033990
A_73_105902	0.0188438	0.039827	1.86714	up	IFIH1	interferon induced with helicase C domain 1 [Source:HGNC Symbol;Acc:18873] [ENSBTAT00000010703]	XM_615590	interferon induced with helicase C domain 1	chr2:34261197-34261811	XM_615590
A_73_104605	0.00360698	0.0286777	1.96157	up	SLC7A14	Bos taurus solute carrier family 7 (orphan transporter), member 14 (SLC7A14), mRNA [NM_001077992]	NM_001077992	solute carrier family 7 (orphan transporter), member 14	chr1:97762795-97762854	NM_001077992
A_73_P046991	0.0322858	0.0451668	1.51016	up	PLXDC2	Bos taurus plexin domain containing 2 (PLXDC2), mRNA [NM_001077928]	NM_001077928	plexin domain containing 2	chr13:22015203-22015262	NM_001077928
A_73_P068511	0.0264943	0.0430401	1.68546	up		Uncharacterized protein [Source:UniProtKB/TrEMBL;Acc:F1MID6] [ENSBTAT00000026050]	XM_003585344		chr18:63282067-63282008	XM_002683989
A_73_P047356	0.0153806	0.0390737	1.59953	up	EPS15	Bos taurus epidermal growth factor receptor pathway substrate 15 (EPS15), mRNA [NM_001098087]	NM_001098087	epidermal growth factor receptor pathway substrate 15	chr3:95528401-95528460	NM_001098087
A_73_P103311	0.01065	0.0368352	1.62527	up	NNAT	Bos taurus neuronatin (NNAT), transcript variant 1, mRNA [NM_001201324]	NM_001201324	neuronatin	chr13:67119632-67119916	NM_001201324
A_73_101374	0.0248283	0.0424617	2.19769	up					chr13:77971497-77971438
A_73_P082491	0.00807626	0.0345035	1.51064	up	CCDC88A	Bos taurus coiled-coil domain containing 88A (CCDC88A), mRNA [NM_001206209]	NM_001206209	coiled-coil domain containing 88A	chr11:37867106-37867047	NM_001206209
A_73_P324536	0.0412527	0.0477332	1.57069	up	TLR3	Bos taurus toll-like receptor 3 (TLR3), mRNA [NM_001008664]	NM_001008664	toll-like receptor 3	chr27:15237064-15237123	NM_001008664
A_73_P300151	0.0450176	0.0486251	1.8883	up		polybromo 1 [Source:HGNC Symbol;Acc:30064] [ENSBTAT00000019672]	XM_583018		chr22:48753845-48753904	XM_003587634
A_73_P126006	0.0213612	0.0410334	1.80318	up		LB02338.CR_B20 GC_BGC-23 Bos taurus cDNA clone IMAGE:8604022 5', mRNA sequence [EV633405]	EV633405		chr19:49609936-49609995	XM_003587466
A_73_P494578	0.0489413	0.0497944	2.56163	up	LOC785429	PREDICTED: Bos taurus transcriptional adapter 2-alpha-like (LOC785429), miscRNA [XR_083998]	XR_083998	transcriptional adapter 2-alpha-like	chr20:28835846-28835787	XR_083087
A_73_103604	0.0233841	0.0418555	6.97184	up	IFNG	Bos taurus interferon, gamma (IFNG), mRNA [NM_174086]	NM_174086	interferon, gamma	chr5:45834860-45834919	NM_174086
A_73_P054621	0.0441994	0.0485243	2.93162	up		Rep: DNA repair protein RAD50 (EC 3.6.-.-) (hRAD50). - Canis familiaris, partial (86%) [TC429520]			chr7:23088740-23088681
A_73_P046171	0.000592	0.0181226	1.69213	up	FDFT1	Bos taurus farnesyl-diphosphate farnesyltransferase 1 (FDFT1), mRNA [NM_001013004]	NM_001013004	farnesyl-diphosphate farnesyltransferase 1	chr8:7427849-7427790	NM_001013004
A_73_P263451	0.00959399	0.0355726	2.00642	up	ARSB	Bos taurus arylsulfatase B (ARSB), mRNA [NM_001101175]	NM_001101175	arylsulfatase B	chr10:9789578-9789519	NM_001101175
A_73_P340851	0.0404731	0.0474259	2.15013	up	NBR1	Bos taurus neighbor of BRCA1 gene 1 (NBR1), mRNA [NM_001100367]	NM_001100367	neighbor of BRCA1 gene 1	chr19:43798444-43798994	NM_001100367
A_73_116186	0.0451273	0.0486251	2.2182	up		Rep: Carboxypeptidase A1 precursor (EC 3.4.17.1). - Bos Taurus, partial (51%) [TC442293]			chr4:094884776-094884834
A_73_101764	0.000158	0.0162196	1.99829	up		1254557 MARC 7BOV Bos taurus cDNA 5', mRNA sequence [DN516121]	DN516121		chr18:56816940-56816999
A_73_102565	0.0433378	0.0483848	4.99932	up		centrosomal protein 152kDa [Source:HGNC Symbol;Acc:29298] [ENSBTAT00000015487]	XM_003582726		chr10:61750901-61750960	XM_003582726
A_73_116778	0.0183288	0.0397356	7.79719	up	RPRML	reprimo-like [Source:HGNC Symbol;Acc:32422] [ENSBTAT00000034754]	XM_868807	reprimo-like	chr19:45889494-45889553	XM_868807
A_73_P044128	1.21e-05	0.00504479	41.0327	up	OAS1X	Bos taurus 2',5'-oligoadenylate synthetase 1, 40/46kDa (OAS1X), mRNA [NM_178108]	NM_178108	2',5'-oligoadenylate synthetase 1, 40/46kDa	chr17:63654792-63654733	NM_178108
A_73_P055071	0.00354767	0.0286611	1.5324	up	RNF168	Bos taurus ring finger protein 168, E3 ubiquitin protein ligase (RNF168), mRNA [NM_001076289]	NM_001076289	ring finger protein 168, E3 ubiquitin protein ligase	chr1:71647430-71647371	NM_001076289
A_73_P262346	0.0011948	0.0210327	1.56087	up	NT5DC1	Bos taurus 5'-nucleotidase domain containing 1 (NT5DC1), mRNA [NM_001105485]	NM_001105485	5'-nucleotidase domain containing 1	chr9:34913581-34913522	NM_001105485
A_73_119432	0.00631403	0.0322331	2.024	up		Rep: Binding-protein-dependent transport systems inner membrane component precursor - Geobacter sp. FRC-32, partial (5%) [TC460914]	XM_592833		chr5:46322778-46322719	XM_592833
A_73_P115376	0.00094	0.0204442	1.61625	up	LOC530553	PREDICTED: Bos taurus uDP-glucuronosyltransferase 2C1-like (LOC530553), mRNA [XM_609027]	XM_609027	uDP-glucuronosyltransferase 2C1-like	chr6:86474004-86473945	XM_002688334
A_73_P327001	0.0163842	0.039183	2.34675	up	MYOF	Bos taurus myoferlin (MYOF), mRNA [NM_001193212]	NM_001193212	myoferlin	chr26:14731480-14731421	NM_001193212
A_73_108916	0.0132805	0.0385179	2.08846	up	ENPP4	Bos taurus ectonucleotide pyrophosphatase/phosphodiesterase 4 (putative) (ENPP4), mRNA [NM_001081535]	NM_001081535	ectonucleotide pyrophosphatase/phosphodiesterase 4 (putative)	chr23:19382755-19382814	NM_001081535
A_73_P378592	0.0364504	0.0465199	3.28212	up	LOC100124497	Bos taurus zinc finger protein LOC100124497 (LOC100124497), mRNA [NM_001102541]	NM_001102541	zinc finger protein LOC100124497	chr18:65134965-65134906	NM_001102541
A_73_P275256	0.029146	0.0440243	1.78391	up	ITGB1	Bos taurus integrin, beta 1 (fibronectin receptor, beta polypeptide, antigen CD29 includes MDF2, MSK12) (ITGB1), mRNA [NM_174368]	NM_174368	integrin, beta 1 (fibronectin receptor, beta polypeptide, antigen CD29 includes MDF2, MSK12)	chr13:20281285-20281558	NM_174368
A_73_P213237	0.0104878	0.0366799	6.15865	up					chr2:130365208-130365267
A_73_P041891	0.00254836	0.0256342	1.7693	up	MTRR	Bos taurus 5-methyltetrahydrofolate-homocysteine methyltransferase reductase (MTRR), mRNA [NM_001030299]	NM_001030299	5-methyltetrahydrofolate-homocysteine methyltransferase reductase	chr20:65427891-65427832	NM_001030299
A_73_112330	0.000186	0.0162196	4.66272	up		Rep: Isoform EP3D of P34979 - Bos taurus (Bovine), partial (7%) [TC421676]			chr10:19315598-19315657
A_73_117986	0.0358336	0.0463862	1.90784	up		Rep: Predicted protein - Coccidioides immitis, partial (10%) [TC421904]			chr7:93238681-93238622
A_73_P078076	0.000265	0.0174316	4.32048	up	SYTL4	Bos taurus synaptotagmin-like 4 (SYTL4), mRNA [NM_001192433]	NM_001192433	synaptotagmin-like 4	chrX:54540315-54540256	NM_001192433
A_73_P460516	0.0140029	0.0385974	4.26075	up	RAPGEF2	Bos taurus Rap guanine nucleotide exchange factor (GEF) 2 (RAPGEF2), mRNA [NM_001191326]	NM_001191326	Rap guanine nucleotide exchange factor (GEF) 2	chr17:40485951-40485892	NM_001191326
A_73_P093051	0.0483352	0.0495833	3.12718	up	CLCA2	chloride channel accessory 2 [Source:HGNC Symbol;Acc:2016] [ENSBTAT00000033512]	XM_002686307	chloride channel accessory 2	chr3:57751089-57751030	XM_002686307
A_73_106180	0.00433302	0.0301621	1.52047	up	TPM4	Bos taurus tropomyosin 4 (TPM4), mRNA [NM_001101162]	NM_001101162	tropomyosin 4	chr7:7923284-7923225	NM_001101162
A_73_106762	0.0208994	0.0408446	3.78028	up	GPR143	G protein-coupled receptor 143 [Source:HGNC Symbol;Acc:20145] [ENSBTAT00000008485]	XM_864344	G protein-coupled receptor 143	chrX:143891251-143891310	XM_864344
A_73_105005	1.89e-05	0.00618043	4.15802	up	ADIG	Bos taurus adipogenin (ADIG), mRNA [NM_001113720]	NM_001113720	adipogenin	chr13:68126264-68128843	NM_001113720
A_73_P203127	0.0182244	0.0397356	3.11449	up		Rep: 5-hydroxytryptamine receptor 3 subunit E - Canis familiaris, partial (93%) [TC432096]			chr1:83642067-83642008
A_73_P085341	0.0147197	0.0385974	1.9467	up	FGF1	Bos taurus fibroblast growth factor 1 (acidic) (FGF1), mRNA [NM_174055]	NM_174055	fibroblast growth factor 1 (acidic)	chr7:55508241-55508182	NM_174055
A_73_111313	0.000474	0.0181226	1.61335	up		Rep: Erythrocyte membrane protein 1-like - Oryza sativa subsp. japonica (Rice), partial (12%) [TC462997]			chr14:1528445-1528386
A_73_P277441	0.0332913	0.0453508	2.45915	up	TMEM2	Bos taurus transmembrane protein 2 (TMEM2), mRNA [NM_001192415]	NM_001192415	transmembrane protein 2	chr8:48278703-48278644	NM_001192415
A_73_101803	0.0229314	0.0416035	1.98377	up	MSH3	Bos taurus mutS homolog 3 (E. coli) (MSH3), mRNA [NM_001102305]	NM_001102305	mutS homolog 3 (E. coli)	chr7:83152509-83152568	NM_001102305
A_73_P106351	0.0406338	0.047441	1.61268	up	CEP135	Bos taurus centrosomal protein 135kDa (CEP135), mRNA [NM_001075406]	NM_001075406	centrosomal protein 135kDa	chr6:73078015-73078913	NM_001075406
A_73_P332796	0.0424197	0.0480274	3.67987	up	HAUS5	Bos taurus HAUS augmin-like complex, subunit 5 (HAUS5), mRNA [NM_001101931]	NM_001101931	HAUS augmin-like complex, subunit 5	chr18:46530297-46531463	NM_001101931
A_73_P078601	0.0373391	0.046603	2.12404	up	MAGEB18	melanoma antigen family B, 18 [Source:HGNC Symbol;Acc:28515] [ENSBTAT00000054725]	XM_002700321	melanoma antigen family B, 18	chrX:124336790-124336731	XM_002700321
A_73_119644	0.00398818	0.0295085	6.90285	up	SCTR	Bos taurus secretin receptor (SCTR), mRNA [NM_001099021]	NM_001099021	secretin receptor	chr2:71623428-71617734	NM_001099021
A_73_P488823	0.0212366	0.0410334	1.6641	up	SEC24A	Bos taurus SEC24 family, member A (S. cerevisiae) (SEC24A), mRNA [NM_001101849]	NM_001101849	SEC24 family, member A (S. cerevisiae)	chr7:47795525-47795584	NM_001101849
A_73_P109961	0.0078678	0.0343292	2.60345	up	BLZF1	Bos taurus basic leucine zipper nuclear factor 1 (BLZF1), mRNA [NM_001045899]	NM_001045899	basic leucine zipper nuclear factor 1	chr16:37860832-37860891	NM_001045899
A_73_105393	0.0279158	0.0435098	4.08776	up		Rep: Tes13-L - Mus musculus (Mouse), partial (6%) [TC458959]	XM_003582497		chr7:112060748-112060689	XM_003582497
A_73_P490388	0.0110031	0.0373381	1.94983	up					chr14:079767483-079767424
A_73_120561	0.00564947	0.0315179	1.50657	up	KLHDC5	Bos taurus kelch domain containing 5 (KLHDC5), mRNA [NM_001205415]	NM_001205415	kelch domain containing 5	chr5:82452524-82452465	NM_001205415
A_73_P283961	0.00929259	0.0351493	3.23316	up	C5	Bos taurus complement component 5 (C5), mRNA [NM_001166616]	NM_001166616	complement component 5	chr8:112272979-112272920	NM_001166616
A_73_P212547	0.0200204	0.0402776	1.55851	up	LOC514257	Bos taurus uncharacterized LOC514257 (LOC514257), mRNA [NM_001075657]	NM_001075657	uncharacterized LOC514257	chr4:99787329-99787270	NM_001075657
A_73_121042	0.0319318	0.0451668	3.04151	up	GJA8	PREDICTED: Bos taurus gap junction protein, alpha 8, 50kDa, transcript variant 1 (GJA8), mRNA [XM_602360]	XM_602360	gap junction protein, alpha 8, 50kDa	chr3:21859109-21859050	XM_602360
A_73_P093041	0.0337426	0.0454689	3.01905	up	LOC784768	Bos taurus calcium-activated chloride channel (LOC784768), mRNA [NM_001242583]	NM_001242583	calcium-activated chloride channel	chr3:57499509-57499450	NM_001242583
A_73_P074746	0.0413246	0.0477332	2.63562	up	CDH22	Bos taurus cadherin 22, type 2 (CDH22), mRNA [NM_001205776]	NM_001205776	cadherin 22, type 2	chr13:75630437-75630378	NM_001205776
A_73_107915	0.0293595	0.0441149	1.59454	up	MOGAT2	Bos taurus monoacylglycerol O-acyltransferase 2 (MOGAT2), mRNA [NM_001001154]	NM_001001154	monoacylglycerol O-acyltransferase 2	chr15:55810282-55810223	NM_001001154
A_73_P292131	0.0399501	0.0474259	1.69759	up	BAZ1A	Bos taurus bromodomain adjacent to zinc finger domain, 1A (BAZ1A), mRNA [NM_001192940]	NM_001192940	bromodomain adjacent to zinc finger domain, 1A	chr21:45552095-45552036	NM_001192940
A_73_P103631	0.00760379	0.0342567	2.1053	up	G2E3	Bos taurus G2/M-phase specific E3 ubiquitin ligase, mRNA (cDNA clone MGC:133923 IMAGE:8055575), complete cds. [BC110160]	BC110160	G2/M-phase specific E3 ubiquitin protein ligase	chr21:41664143-41664202
A_73_P511268	0.0380173	0.0467603	2.41894	up					chr15:048938928-048938869
A_73_P422991	0.0496931	0.0498971	1.5537	up	ZBTB33	Bos taurus zinc finger and BTB domain containing 33 (ZBTB33), mRNA [NM_001098157]	NM_001098157	zinc finger and BTB domain containing 33	chrX:5044300-5044241	NM_001098157
A_73_113583	0.0185365	0.0397356	4.03751	up	RAPGEF4	Bos taurus Rap guanine nucleotide exchange factor (GEF) 4 (RAPGEF4), mRNA [NM_001192902]	NM_001192902	Rap guanine nucleotide exchange factor (GEF) 4	chr2:23645820-23645761	NM_001192902
A_73_P047156	0.00716929	0.033759	3.30817	up	LOC407148	Bos taurus ADP-ribosyltransferase 5-like (LOC407148), mRNA [NM_001104964]	NM_001104964	ADP-ribosyltransferase 5-like	chr15:052224935-052224994	NM_001104964
A_73_P069856	0.025606	0.0429069	2.18403	up	HTR1A	5-hydroxytryptamine 1A receptorUncharacterized protein [Source:UniProtKB/TrEMBL;Acc:Q8MI15] [ENSBTAT00000054712]	AJ491858	5-hydroxytryptamine (serotonin) receptor 1A	chr20:15558684-15558743	XM_002696304
A_73_P383091	0.0342827	0.0456773	2.63181	up	SCG2	Bos taurus secretogranin II (SCG2), mRNA [NM_174176]	NM_174176	secretogranin II	chr2:112550705-112550646	NM_174176
A_73_P276851	0.010977	0.0373381	2.2657	up	CCDC88A	Bos taurus coiled-coil domain containing 88A (CCDC88A), mRNA [NM_001206209]	NM_001206209	coiled-coil domain containing 88A	chr11:37906136-37906077	NM_001206209
A_73_P282091	0.0201703	0.0403441	1.92007	up	UCHL1	Bos taurus ubiquitin carboxyl-terminal esterase L1 (ubiquitin thiolesterase) (UCHL1), mRNA [NM_001046172]	NM_001046172	ubiquitin carboxyl-terminal esterase L1 (ubiquitin thiolesterase)	chr6:61807667-61807726	NM_001046172
A_73_104473	0.0425708	0.0480274	2.88346	up		Rep: Transcription factor Dlx6 - Mus musculus (Mouse), partial (70%) [TC400047]	XM_002686666		chr4:14281569-14281628	XM_002686666
A_73_P459931	0.00963923	0.0356582	2.87528	up	TTR	Bos taurus transthyretin (TTR), mRNA [NM_173967]	NM_173967	transthyretin	chr24:25854783-25854724	NM_173967
A_73_P368191	0.0430753	0.0482236	1.80859	up		Alstrom syndrome 1 [Source:HGNC Symbol;Acc:428] [ENSBTAT00000047267]	XM_612325		chr11:10886162-10886103	XM_002691212
A_73_P459756	0.0228789	0.0416035	3.17369	up	PPP1R15B	protein phosphatase 1, regulatory subunit 15B [Source:HGNC Symbol;Acc:14951] [ENSBTAT00000017382]	XM_002693904	protein phosphatase 1, regulatory subunit 15B	chr16:1971921-1971862	XM_002693904
A_73_119637	0.00402438	0.0296671	1.67067	up		010126BEMN058500HT BEMN Bos taurus cDNA, mRNA sequence [DY082358]	DY082358		chrX:92836990-92837049
A_73_P076196	0.0214445	0.0410334	1.70377	up	QSER1	Bos taurus glutamine and serine rich 1 (QSER1), mRNA [NM_001256881]	NM_001256881	glutamine and serine rich 1	chr15:64393631-64393690	NM_001256881
A_73_P254141	0.0370886	0.046603	2.13732	up	GPC3	Bos taurus glypican 3 (GPC3), mRNA [NM_001035463]	NM_001035463	glypican 3	chrX:17305709-17305650	NM_001035463
A_73_114628	0.00280698	0.0267843	1.50845	up	FRY	Bos taurus furry homolog (Drosophila) (FRY), mRNA [NM_001205616]	NM_001205616	furry homolog (Drosophila)	chr12:28768316-28768257	NM_001205616
A_73_115374	0.000184	0.0162196	1.73182	up		Rep: Protein FAM19A1 precursor (Chemokine-like protein TAFA-1). - Takifugu rubripes, partial (11%) [TC435271]			chr17:70274213-70274154
A_73_P366311	0.0463335	0.048938	2.00236	up	PLXDC2	Bos taurus plexin domain containing 2 (PLXDC2), mRNA [NM_001077928]	NM_001077928	plexin domain containing 2	chr13:21892906-21898503	NM_001077928
A_73_P120701	0.0263018	0.0430154	4.18028	up		Rep: Outer mitochondrial membrane protein porin - Dictyostelium discoideum (Slime mold), partial (7%) [TC406587]			chr24:45145426-45145485
A_73_P061731	0.0327613	0.0451668	1.72307	up		Rep: Isoform E of Q9UPX8 - Homo sapiens (Human), partial (97%) [TC419486]	XM_002684570		chr29:48665893-48665834	XM_002684570
A_73_P275261	0.0405228	0.0474259	2.51153	up		Uncharacterized protein [Source:UniProtKB/TrEMBL;Acc:F1N1Y5] [ENSBTAT00000057049]	XM_003582703		chr10:38107388-38107447	XM_003582703
A_73_P095046	0.00332317	0.0282559	1.63411	up	USP37	Ubiquitin carboxyl-terminal hydrolase 37 [Source:UniProtKB/Swiss-Prot;Acc:F1N5V1] [ENSBTAT00000038243]	Z86040	ubiquitin specific peptidase 37	chr2:107175180-107175121	XM_002685571
A_73_P064951	0.0377732	0.0467603	1.68003	up		Rep: Carboxypeptidase D precursor (EC 3.4.17.22) (Metallocarboxypeptidase D) (gp180). - Canis familiaris, partial (14%) [TC405375]	XM_003583547		chr19:22099273-22099214	XM_003583547
A_73_P078745	0.0128741	0.038378	2.20431	up		Uncharacterized protein [Source:UniProtKB/TrEMBL;Acc:E1BCR4] [ENSBTAT00000053697]	XR_139192		chrX:137216486-137216427	XM_003584352
A_73_101438	0.00181996	0.0235268	3.9214	up					chr20:057145705-057145764
A_73_P041131	0.0160612	0.039183	2.05031	up	LOC768323	Bos taurus uncharacterized LOC768323 (LOC768323), mRNA [NM_001078135]	NM_001078135	uncharacterized LOC768323	chr7:29459601-29459660	NM_001078135
A_73_P038406	0.0175109	0.0396658	3.14893	up	ACTN2	Bos taurus actinin, alpha 2 (ACTN2), mRNA [NM_001034635]	NM_001034635	actinin, alpha 2	chr28:9450858-9450917	NM_001034635
A_73_P096566	0.0375267	0.0466116	2.74624	up	ECT2	Bos taurus epithelial cell transforming sequence 2 oncogene (ECT2), mRNA [NM_001097573]	NM_001097573	epithelial cell transforming sequence 2 oncogene	chr1:95477027-95476968	NM_001097573
A_73_P034781	0.00409483	0.0297567	1.92922	up	P2RY12	Bos taurus purinergic receptor P2Y, G-protein coupled, 12 (P2RY12), mRNA [NM_001001174]	NM_001001174	purinergic receptor P2Y, G-protein coupled, 12	chr1:117640615-117640674	NM_001001174
A_73_103508	0.00853419	0.0351263	1.71892	up		Rep: EhbB-like protein - Methanococcus voltae A3, partial (13%) [TC410836]			chr6:7074393-7074452
A_73_P114766	0.0150392	0.0389227	1.62494	up		SH2 domain containing 6 [Source:HGNC Symbol;Acc:30439] [ENSBTAT00000033051]			chr11:49390309-49390250
A_73_111052	0.0325931	0.0451668	1.73876	up					chr5:1400817-1400876
A_73_P063921	0.0341009	0.0456019	3.20125	up	LOC515578	Bos taurus glyoxylate reductase-like (LOC515578), mRNA [NM_001075719]	NM_001075719	glyoxylate reductase-like	chr24:744670-744611	NM_001075719
A_73_P031846	0.0231127	0.0418035	2.62177	up	ANKRD22	Bos taurus ankyrin repeat domain 22 (ANKRD22), mRNA [NM_001081579]	NM_001081579	ankyrin repeat domain 22	chr26:10542575-10542516	NM_001081579
A_73_P464636	0.00112162	0.0206809	2.96294	up	LOC617702	PREDICTED: Bos taurus leukocyte immunoglobulin-like receptor, subfamily B, member 5-like (LOC782062), mRNA [XM_003585344]	XM_003585344	leukocyte immunoglobulin-like receptor, subfamily B (with TM and ITIM domains), member 3-like	chr18:63355644-63355702	XM_003585344
A_73_P106766	0.0133344	0.0385179	1.74585	up	LOC613389	Bos taurus mRNA for T-cell receptor beta chain, variable, diversity, and joining regions. [D90133]	D90133	T-cell receptor beta chain V region	chr4:106555454-106555513	XM_003582148
A_73_P057186	0.0278773	0.0434877	1.5501	up	SUV420H1	Bos taurus suppressor of variegation 4-20 homolog 1 (Drosophila) (SUV420H1), mRNA [NM_001076551]	NM_001076551	suppressor of variegation 4-20 homolog 1 (Drosophila)	chr29:46322853-46322794	NM_001076551
A_73_P108011	0.0238298	0.0419486	2.29982	up	DBT	Bos taurus dihydrolipoamide branched chain transacylase E2 (DBT), nuclear gene encoding mitochondrial protein, mRNA [NM_173905]	NM_173905	dihydrolipoamide branched chain transacylase E2	chr3:43214044-43214103	NM_173905
A_73_109957	0.0142511	0.0385974	2.08682	up		Rep: Cation transport ATPase, E1-E2 family protein - Pseudoalteromonas tunicata D2, partial (3%) [TC436527]			chr17:44595565-44595506
A_73_107101	0.0139141	0.0385974	1.57258	up	DPYD	Bos taurus dihydropyrimidine dehydrogenase (DPYD), mRNA [NM_174041]	NM_174041	dihydropyrimidine dehydrogenase	chr3:46487010-46487069	NM_174041
A_73_P337156	0.0105512	0.0367046	1.63824	up	CX3CR1	Bos taurus chemokine (C-X3-C motif) receptor 1 (CX3CR1), mRNA [NM_001102558]	NM_001102558	chemokine (C-X3-C motif) receptor 1	chr22:12613975-12613916	NM_001102558
A_73_100290	0.0164331	0.039183	1.54879	up	CIDEA	Bos taurus cell death-inducing DFFA-like effector a (CIDEA), mRNA [NM_001083449]	NM_001083449	cell death-inducing DFFA-like effector a	chr24:43231467-43231408	NM_001083449
A_73_109432	0.00167231	0.0230619	7.11742	up	CYB5R2	cytochrome b5 reductase 2 [Source:HGNC Symbol;Acc:24376] [ENSBTAT00000021485]	XM_617111	cytochrome b5 reductase 2	chr15:45656930-45656989	XM_617111
A_73_P073616	0.0237862	0.0419443	2.34956	up	NRP1	Bos taurus neuropilin 1 (NRP1), mRNA [NM_001205660]	NM_001205660	neuropilin 1	chr13:20056918-20056977	NM_001205660
A_73_P108416	0.00638797	0.0325293	2.79073	up		Bos taurus B11 cell-line anti-idiotype Ig lambda chain V region (IgL) mRNA, partial cds. [U11633]	U11633
A_73_P049236	0.0347757	0.0457847	2.411	up	CLIC2	Bos taurus chloride intracellular channel 2 (CLIC2), mRNA [NM_001081727]	NM_001081727	chloride intracellular channel 2	chrX:038523368-038523427	NM_001081727
A_73_P109601	0.00885181	0.0351263	1.75459	up	GGPS1	Bos taurus geranylgeranyl diphosphate synthase 1 (GGPS1), mRNA [NM_001079801]	NM_001079801	geranylgeranyl diphosphate synthase 1	chr28:8123190-8123249	NM_001079801
A_73_P203192	0.0176087	0.0396658	1.69949	up		Rep: Non-imprinted in Prader-Willi/Angelman syndrome region protein 1 - Homo sapiens (Human), partial (98%) [TC398341]	XM_002685192		chr2:964389-964448	XM_002685192
A_73_P091356	0.0197805	0.0402776	6.86117	up	LOC100140174	Uncharacterized protein [Source:UniProtKB/TrEMBL;Acc:F1MMA5] [ENSBTAT00000006472]	XM_003582265	NKG2A-like	chr5:99599999-99599940	XM_003582265
A_73_118307	0.0304491	0.0445714	2.51109	up	PPP2R2B	Bos taurus protein phosphatase 2, regulatory subunit B, beta (PPP2R2B), mRNA [NM_001014879]	NM_001014879	protein phosphatase 2, regulatory subunit B, beta	chr7:59782936-59782877	NM_001014879
A_73_P036111	0.0171873	0.0395568	1.9289	up	SLMO2	Bos taurus slowmo homolog 2 (Drosophila) (SLMO2), mRNA [NM_001035476]	NM_001035476	slowmo homolog 2 (Drosophila)	chr13:57864294-57864353	NM_001035476
A_73_101071	0.0160539	0.039183	2.15071	up	NAP1L5	Bos taurus nucleosome assembly protein 1-like 5 (NAP1L5), mRNA [NM_001077878]	NM_001077878	nucleosome assembly protein 1-like 5	chr6:37511016-37511076	NM_001077878
A_73_P134671	0.037793	0.0467603	2.045	up	LOC100851369	PREDICTED: Bos taurus uncharacterized LOC100851369 (LOC100851369), miscRNA [XR_138605]	XR_138605	uncharacterized LOC100851369	chr1:6465595-6465536	XR_138605
A_73_106192	0.0215354	0.0410334	2.1528	up	ITPR2	Bos taurus inositol 1,4,5-trisphosphate receptor, type 2 (ITPR2), mRNA [NM_174369]	NM_174369	inositol 1,4,5-trisphosphate receptor, type 2	chr5:83986079-83986138	NM_174369
A_73_P206162	0.0282532	0.0435953	1.96715	up		Uncharacterized protein [Source:UniProtKB/TrEMBL;Acc:E1B6Z4] [ENSBTAT00000026429]			chr18:57971858-57971799
A_73_118680	0.0198764	0.0402776	2.69836	up	IDO1	Bos taurus indoleamine 2,3-dioxygenase 1 (IDO1), mRNA [NM_001101866]	NM_001101866	indoleamine 2,3-dioxygenase 1	chr27:34698977-34699034	NM_001101866
A_73_117909	0.0465275	0.048999	2.34715	up	LOC508070	PREDICTED: Bos taurus interferon-induced very large GTPase 1-like (LOC508070), miscRNA [XR_083859]	XR_083859	interferon-induced very large GTPase 1-like	chr15:46858568-46858627	XR_083455
A_73_P041156	0.00599353	0.0318718	2.80674	up	DEFB7	Bos taurus defensin beta 7 (DEFB7), mRNA [NM_001102362]	NM_001102362	defensin beta 7	chr27:5223672-5223731	NM_001102362
A_73_P292176	0.0231835	0.0418408	1.53186	up	FAM204A	Bos taurus family with sequence similarity 204, member A (FAM204A), mRNA [NM_001035052]	NM_001035052	family with sequence similarity 204, member A	chr26:38945691-38945113	NM_001035052
A_73_P316391	0.0407613	0.047554	1.73419	up	PIK3CB	Bos taurus phosphoinositide-3-kinase, catalytic, beta polypeptide (PIK3CB), mRNA [NM_001206047]	NM_001206047	phosphoinositide-3-kinase, catalytic, beta polypeptide	chr1:131521854-131528820	NM_001206047
A_73_P045591	0.0200785	0.0402776	2.12382	up	ANGPT1	Bos taurus angiopoietin 1 (ANGPT1), mRNA [NM_001076797]	NM_001076797	angiopoietin 1	chr14:059436224-059436283	NM_001076797
A_73_P304616	0.00259306	0.025704	1.61052	up	FDFT1	Bos taurus farnesyl-diphosphate farnesyltransferase 1 (FDFT1), mRNA [NM_001013004]	NM_001013004	farnesyl-diphosphate farnesyltransferase 1	chr8:7428070-7428011	NM_001013004
A_73_116075	0.0251839	0.0427077	1.5454	up	LOC514257	Bos taurus uncharacterized LOC514257 (LOC514257), mRNA [NM_001075657]	NM_001075657	uncharacterized LOC514257	chr4:99787308-99787249	NM_001075657
A_73_P126461	0.0210448	0.0410053	2.46583	up	MGC148318	Bos taurus uncharacterized LOC782788 (MGC148318), non-coding RNA [NR_038117]	NR_038117	uncharacterized LOC782788	chr10:74530143-74530202	NR_038117
A_73_101517	0.0463006	0.048938	2.03962	up		Rep: At1g02405 - Arabidopsis thaliana (Mouse-ear cress), partial (9%) [TC419967]			chr24:40369938-40369997
A_73_P093011	0.0219048	0.0411482	2.08715	up		Uncharacterized protein [Source:UniProtKB/TrEMBL;Acc:F1N1I1] [ENSBTAT00000054825]	XM_003581986		chr3:54848200-54848259	XM_003581986
A_73_113459	0.0405552	0.0474259	2.38418	up	FMO2	Bos taurus flavin containing monooxygenase 2 (non-functional) (FMO2), transcript variant 1, mRNA [NM_001163274]	NM_001163274	flavin containing monooxygenase 2 (non-functional)	chr16:39653566-39653625	NM_001163274
A_73_110052	0.0453148	0.0486251	1.81241	up	USP46	Bos taurus ubiquitin specific peptidase 46 (USP46), mRNA [NM_001192444]	NM_001192444	ubiquitin specific peptidase 46	chr6:69955990-69955931	NM_001192444
A_73_P158772	0.00114503	0.020719	1.92482	up	LOC100138791	LB004101.CR_O21 GC_BGC-04 Bos taurus cDNA clone IMAGE:8066255, mRNA sequence [DT844152]	DT844152	uncharacterized LOC100138791	chr18:13396144-13396203	XM_001790567
A_73_P058406	0.0200988	0.0402776	2.37336	up	IGSF6	immunoglobulin superfamily, member 6 [Source:HGNC Symbol;Acc:5953] [ENSBTAT00000025119]	FE013775	immunoglobulin superfamily, member 6	chr25:20345873-20344649	XM_001787744
A_73_117356	0.0111129	0.0374277	2.78979	up		Rep: leukocyte immunoglobulin-like receptor, subfamily B, member 3 isoform 1 - Homo sapiens, partial (46%) [TC463881]	XM_002695426		chr18:063219949-063220008	XM_002695426
A_73_P103601	0.035391	0.0460676	2.17943	up	CALD1	Bos taurus caldesmon 1 (CALD1), mRNA [NM_174258]	NM_174258	caldesmon 1	chr4:99544661-99544718	NM_174258
A_73_120969	0.0369566	0.046603	2.66484	up	CTNNA3	Bos taurus catenin (cadherin-associated protein), alpha 3 (CTNNA3), mRNA [NM_001079638]	NM_001079638	catenin (cadherin-associated protein), alpha 3	chr28:22419325-22419266	NM_001079638
A_73_P409056	0.0403082	0.0474259	2.87982	up	DOC2A	Bos taurus double C2-like domains, alpha (DOC2A), mRNA [NM_001083709]	NM_001083709	double C2-like domains, alpha	chr25:26518007-26518066	NM_001083709
A_73_P052791	0.0427873	0.0481252	2.0551	up		syntaxin 2 [Source:HGNC Symbol;Acc:3403] [ENSBTAT00000061491]	DV777375		chr17:47344187-47344246	XM_003583302
A_73_P332156	0.0145671	0.0385974	1.62862	up	OAT	Bos taurus ornithine aminotransferase (OAT), nuclear gene encoding mitochondrial protein, mRNA [NM_001034240]	NM_001034240	ornithine aminotransferase	chr26:44381925-44381866	NM_001034240
A_73_P415146	0.0258884	0.0429069	2.49912	up	TRPM6	transient receptor potential cation channel, subfamily M, member 6 [Source:HGNC Symbol;Acc:17995] [ENSBTAT00000046932]	XM_002689663	transient receptor potential cation channel, subfamily M, member 6	chr8:51149656-51149454	XM_002689663
A_73_P054196	0.0263249	0.0430154	1.76118	up	LOC617702	Uncharacterized protein [Source:UniProtKB/TrEMBL;Acc:F1MID6] [ENSBTAT00000026050]	XR_138959	leukocyte immunoglobulin-like receptor, subfamily B (with TM and ITIM domains), member 3-like	chr18:63351413-63351472	XM_002707893
A_73_P497818	0.024821	0.0424617	2.49649	up	CLIC2	Bos taurus chloride intracellular channel 2 (CLIC2), mRNA [NM_001081727]	NM_001081727	chloride intracellular channel 2	chrX:38522145-38522204	NM_001081727
A_73_120882	0.0171134	0.0395568	2.07807	up	F11R	Bos taurus F11 receptor (F11R), mRNA [NM_174095]	NM_174095	F11 receptor	chr3:8508003-8508062	NM_174095
A_73_114075	0.0180009	0.0397356	1.53665	up		C39550A FLM Bos taurus cDNA clone C3955 5', mRNA sequence [EE926014]	EE926014		chr5:74652901-74652960
A_73_P255031	0.0327344	0.0451668	1.83676	up	TPR	Bos taurus translocated promoter region (to activated MET oncogene) (TPR), mRNA [NM_001205623]	NM_001205623	translocated promoter region (to activated MET oncogene)	chr16:68939333-68939194	NM_001205623
A_73_116014	0.0434584	0.0483917	3.43438	up	TUFT1	Bos taurus tuftelin 1 (TUFT1), mRNA [NM_174479]	NM_174479	tuftelin 1	chr3:19238339-19238280	NM_174479
A_73_P150306	0.0161946	0.039183	1.62885	up		BS320038000D9 Subtracted Lewin Cattle Spleen Bos taurus cDNA clone BS320038000D9 5', mRNA sequence [BM361940]	BM361940		chr18:63380440-63380499	XM_002695438
A_73_P307631	0.00768318	0.0342567	3.20104	up	RUFY2	Bos taurus RUN and FYVE domain containing 2 (RUFY2), mRNA [NM_001206707]	NM_001206707	RUN and FYVE domain containing 2	chr28:24955285-24955226	NM_001206707
A_73_P309086	0.0251641	0.0427077	2.36337	up	ARHGAP21	Rho GTPase activating protein 21 [Source:HGNC Symbol;Acc:23725] [ENSBTAT00000029139]	XM_002692070	Rho GTPase activating protein 21	chr13:25735934-25735875	XM_002692070
A_73_P183627	0.0419447	0.0479211	1.77681	up		LB00553.CR_H10 GC_BGC-05 Bos taurus cDNA clone IMAGE:8027676, mRNA sequence [DT861807]	DT861807		chr12:73159013-73158954
A_73_P115166	0.0223186	0.0412486	1.55555	up	SMC5	structural maintenance of chromosomes 5 [Source:HGNC Symbol;Acc:20465] [ENSBTAT00000061396]	XM_585794	structural maintenance of chromosomes 5	chr8:46802727-46805259	XM_585794
A_73_P043281	0.00451852	0.0301699	2.18483	up	MPHOSPH9	M-phase phosphoprotein 9 [Source:RefSeq peptide;Acc:NP_001092518] [ENSBTAT00000029674]	BC146226	M-phase phosphoprotein 9	chr17:54604863-54604922
A_73_P260601	0.00812912	0.0345107	1.67207	up	TUBA3E	Bos taurus tubulin, alpha 3e (TUBA3E), mRNA [NM_001038163]	NM_001038163	tubulin, alpha 3e	chr17:74338287-74338228	NM_001038163
A_73_P047336	0.00747842	0.0340869	1.80756	up	CX3CR1	Bos taurus chemokine (C-X3-C motif) receptor 1 (CX3CR1), mRNA [NM_001102558]	NM_001102558	chemokine (C-X3-C motif) receptor 1	chr22:12613505-12613446	NM_001102558
